# Supplementary material
Source: publisher figshare collection journal article supplement (https://acs.figshare.com/ndownloader/files/3601923)

Supplementary Information for

**Alkoxyboration: Ring-Closing Addition of B–O  $\sigma$  Bonds Across Alkynes**

Joshua J. Hirner, Darius J. Faizi and Suzanne A. Blum\*

*Department of Chemistry, University of California, Irvine, California 92697-2025*

Email: blums@uci.edu

|                                                                                                |    |
|------------------------------------------------------------------------------------------------|----|
| I. General Methods .....                                                                       | 2  |
| II. Synthetic Procedures .....                                                                 | 3  |
| A. Preparation of 2-alkynyl phenol substrates <b>1a–1j</b> .....                               | 3  |
| B. Screen of potential alkoxyboration catalysts .....                                          | 14 |
| C. Synthesis and isolation of benzofuran alkoxyboration products <b>4a–4j</b> .....            | 15 |
| D. General procedure NMR conversions using ERETIC .....                                        | 26 |
| E. Gram-scale preparation of <b>4i</b> .....                                                   | 27 |
| F. Downstream functionalization reactions to produce <b>6</b> , <b>8</b> , and <b>10</b> ..... | 28 |
| G. Synthesis of dihydrofuran product <b>12</b> .....                                           | 30 |
| III. References .....                                                                          | 31 |
| IV. NMR Spectra .....                                                                          | 32 |

## I. General Methods

All chemicals were used as received from commercial sources unless otherwise noted. Sodium trifluoroacetate was dried at 130 °C at 10 mTorr for 18 h before use. Toluene and dichloromethane were purified by passage through an alumina column under argon pressure on a push-still solvent system. Anhydrous dimethylsulfoxide was obtained by stirring over activity I alumina 18 h under N<sub>2</sub> atmosphere, decanting the liquid, and distilling the liquid at 10 Torr over CaH<sub>2</sub>. Acetone was dried by distillation over anhydrous CaSO<sub>4</sub> under N<sub>2</sub> atmosphere. Toluene-*d*<sub>8</sub> was dried over CaH<sub>2</sub>, degassed using three freeze-pump-thaw cycles, and vacuum transferred prior to use. All manipulations were conducted in a glovebox under nitrogen atmosphere or using standard Schlenk techniques unless otherwise specified. Analytical thin layer chromatography (TLC) was performed using Merck F<sub>250</sub> plates. Plates were visualized under UV irradiation (254 nm) and/or using a basic aqueous solution of potassium permanganate. Flash chromatography was conducted using a Teledyne Isco Combiflash® Rf 200 Automated Flash Chromatography System, and Teledyne Isco Redisep® 35–70 µm silica gel. All proton and carbon nuclear magnetic resonance (<sup>1</sup>H and <sup>13</sup>C NMR) spectra were recorded on a Bruker DRX-400 spectrometer, Bruker DRX-500 spectrometer outfitted with a cryoprobe, or a Bruker AVANCE-600 spectrometer. All boron nuclear magnetic resonance (<sup>11</sup>B NMR) spectra were recorded on a Bruker AVANCE-600 spectrometer. All fluorine nuclear magnetic resonance (<sup>19</sup>F NMR) spectra were recorded on a Bruker DRX-400. All chemical shifts (δ) are reported in parts per million (ppm) downfield of tetramethylsilane, and referenced to the residual protiated solvent peak (δ = 7.26 ppm for CDCl<sub>3</sub>, δ = 2.50 ppm for *d*<sub>6</sub>-DMSO, or δ = 1.94 ppm for CD<sub>3</sub>CN in <sup>1</sup>H NMR spectroscopy experiments; δ = 77.16 ppm for CDCl<sub>3</sub>, δ = 39.52 ppm for *d*<sub>6</sub>-DMSO, or δ = 1.34 ppm for CD<sub>3</sub>CN in <sup>13</sup>C NMR spectroscopy experiments). <sup>11</sup>B and <sup>19</sup>F NMR spectroscopy experiments are referenced to the absolute frequency of 0 ppm in the <sup>1</sup>H dimension according to the Xi scale. Low- and high-resolution mass spectrometry data were obtained at the University of California, Irvine.

## II. Synthetic Procedures

### A. Preparation of 2-alkynyl phenol substrates 1a–2j

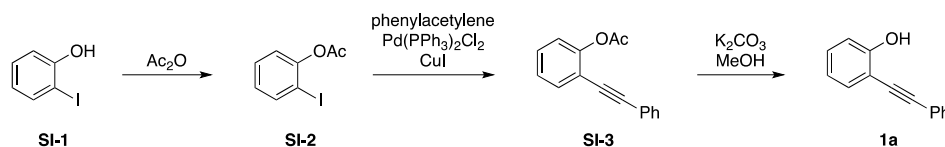

**2-Iodophenyl acetate (SI-2).** A solution of **SI-1** (6.72 g, 30.5 mmol, 1.00 equiv) and 4-dimethylaminopyridine (DMAP, 190 mg, 1.5 mmol, 5.0 mol %) was prepared in Et<sub>3</sub>N (6.4 mL, 46 mmol, 1.5 equiv) and DCM (60 mL). Acetic anhydride (3.46 mL, 36.6 mmol, 1.20 equiv) was added dropwise. [Note: slight exotherm.] The reaction mixture stirred at 25 °C vented to air with a needle for 3 h. At this time, analysis by TLC (10% EtOAc/hexanes) indicated full conversion to a single new product. To the reaction mixture was added 50 mL water, and the resulting biphasic mixture was separated. The aqueous layer was extracted with DCM (3 × 25 mL), and then the combined organic layers were washed with brine (1 × 50 mL). The organic layer was then dried over Na<sub>2</sub>SO<sub>4</sub>, filtered, and concentrated in vacuo to a colorless oil, which solidified to a white solid upon standing. The resulting solid was crushed to a powder, and volatiles were removed at c.a. 10 mTorr for 2.5 h to afford **SI-2** as a white powder (7.27 g, 91% yield). <sup>1</sup>H NMR (CDCl<sub>3</sub>, 600 MHz): δ 7.84 (dd, *J* = 7.9, 1.4 Hz, 1H), 7.38 (td, *J* = 7.2, 1.3 Hz, 1H), 7.11 (dd, *J* = 8.0, 1.4 Hz, 1H), 6.99 (td, *J* = 7.6, 1.3 Hz, 1H), 2.38 (s, 3H). This spectrum is in agreement with previously reported spectral data.<sup>1</sup>

**2-(Phenylethynyl)phenyl acetate (SI-3).** A 100-mL Schlenk tube was charged with Et<sub>3</sub>N (20 mL) and sparged with N<sub>2</sub> for 20 min. Compound **SI-2** (2.62 g, 10.0 mmol, 1.00 equiv), Pd(PPh<sub>3</sub>)<sub>2</sub>Cl<sub>2</sub> (120 mg, 0.20 mmol, 2.0 mol %), and CuI (95 mg, 0.50 mmol, 5.0 mol %) were added under positive N<sub>2</sub> pressure, then neat phenylacetylene (1.20 mL, 11.0 mmol, 1.10 equiv) was added. The reaction mixture was heated at 45 °C for 19 h, at which time analysis by TLC (5% EtOAc/hexanes) indicated complete consumption of the aryl iodide. The reaction mixture was cooled to 25 °C and diluted with 75 mL Et<sub>2</sub>O. The resulting mixture was washed with saturated aqueous NH<sub>4</sub>Cl (4 × 25 mL) and brine (2 × 25 mL). The organic layer was dried over Na<sub>2</sub>SO<sub>4</sub>, filtered, and concentrated in vacuo to a dark brown oil. The oily residue was purified by column chromatography using an elution gradient from 5% EtOAc/hexanes to 10% EtOAc/hexanes. Volatiles were removed at c.a. 10 mTorr and 25 °C for 18 h to afford **SI-3** as a brown oil (2.50 g, quant.). <sup>1</sup>H NMR (CDCl<sub>3</sub>, 500 MHz): δ 7.59 (dd, *J* = 7.9, 1.4 Hz, 1H), 7.52–7.50 (m, 2H), 7.39–7.35 (m, 4), 7.25 (td, *J* = 7.6, 1.3 Hz, 1H), 7.14 (dd, *J* = 8.0, 1.4 Hz, 1H), 2.38 (s, 3H). This spectrum is in agreement with previously reported spectral data.<sup>1</sup>

**2-(Phenylethynyl)phenol (1a).** A suspension of K<sub>2</sub>CO<sub>3</sub> (2.00 g, 14.5 mmol, 2.05 equiv) in MeOH (100 mL) and THF (90 mL) was cooled to 0 °C in an ice bath. A solution of **SI-3** (1.69 g, 7.16 mmol, 1.00 equiv) in THF (10 mL) was added dropwise over 2 min. The resulting heterogeneous mixture was stirred vigorously at 0 °C vented to air with a needle for 1.5 h, at which time analysis by TLC (20% EtOAc/hexanes) revealed complete consumption of **SI-3**. The cold reaction mixture was decanted into 200 mL DCM and washed with saturated aqueous

NH<sub>4</sub>Cl (1 × 100 mL). The organic layer was then dried over Na<sub>2</sub>SO<sub>4</sub>, filtered, and concentrated in vacuo to a brown solid residue, which was purified by silica gel chromatography using an elution gradient from 100% hexanes to 10% EtOAc/hexanes. Removal of volatiles at c.a. 10 mTorr and 50 °C for 18 h to afford **1a** as a golden solid (970 mg, 70% yield). <sup>1</sup>H NMR (CDCl<sub>3</sub>, 600 MHz): δ 7.57–7.55 (m, 2H), 7.44 (dd, *J* = 7.6, 1.6 Hz, 1H), 7.40–7.39 (m, 3H), 7.30–7.27 (m, 1H), 7.00 (dd, *J* = 8.3, 0.8 Hz, 1H), 6.93 (td, *J* = 7.5, 1.0 Hz, 1H), 5.83 (s, 1H). This spectrum is in agreement with previously reported spectral data.<sup>2</sup>

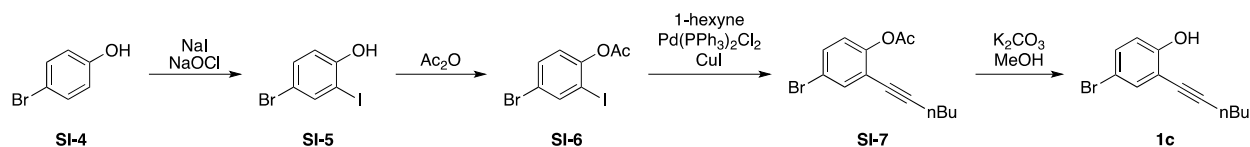

**4-Bromo-2-iodophenol (SI-5)** was prepared according to a literature procedure<sup>3</sup> in 66% yield. <sup>1</sup>H NMR (CDCl<sub>3</sub>, 600 MHz): δ 7.78 (d, *J* = 2.3 Hz, 1H), 7.35 (dd, *J* = 8.6, 2.3 Hz, 1H), 6.89 (d, *J* = 8.2 Hz, 1H), 5.25 (br s, 1H). This spectrum is in agreement with previously reported spectral data.

**4-Bromo-2-iodophenyl acetate (SI-6).** A solution of **SI-5** (1.79 g, 6.00 mmol, 1.00 equiv) and 4-dimethylaminopyridine (DMAP, 40. mg, 0.30 mmol, 5.0 mol %) in Et<sub>3</sub>N (1.0 mL, 7.2 mmol, 1.2 equiv) and DCM (12 mL) was cooled to 0 °C in an ice bath. Acetic anhydride (680 μL, 7.2 mmol, 1.2 equiv) was added dropwise over c.a. 1 min, and then the cooling bath was removed. The reaction mixture was stirred at 25 °C while vented to air with a needle for 1 h. At this time, analysis by TLC (10% EtOAc/hexanes) indicated full conversion to a single new product. The reaction mixture was washed with water (3 × 3 mL) and brine (3 × 3 mL), dried over Na<sub>2</sub>SO<sub>4</sub>, filtered, and concentrated in vacuo to a colorless oil, which solidified to a white solid upon standing. The resulting solid was crushed to a powder, and volatiles were removed at c.a. 10 mTorr for 2.5 h to afford **SI-6** as a white powder (1.90 g, 93% yield).

TLC (10% EtOAc/hexanes): *R*<sub>f</sub> = 0.52, visualized by UV absorbance and KMnO<sub>4</sub> stain.

<sup>1</sup>H NMR (CDCl<sub>3</sub>, 500 MHz): δ 7.97 (d, *J* = 2.3 Hz, 1H), 7.49 (dd, *J* = 8.6, 2.3 Hz, 1H), 6.98 (d, *J* = 8.6 Hz, 1H), 2.37 (s, 3H).

<sup>13</sup>C NMR (CDCl<sub>3</sub>, 125 MHz): 168.5, 150.6, 141.5, 132.6, 124.5, 119.9, 91.6, 21.3.

HRMS (GC/ESI): Calculated for C<sub>8</sub>H<sub>10</sub>BrINO<sub>2</sub> ([M+NH<sub>4</sub>]<sup>+</sup>), 357.8940; found 357.8942.

**4-Bromo-2-(hex-1-yn-1-yl)phenyl acetate (SI-7).** A 100-mL Schlenk tube was charged with 25 mL THF, Et<sub>3</sub>N (3.9 mL, 28 mmol, 4.1 equiv), and a stirbar. The combined solvents were sparged with N<sub>2</sub> for 25 min. Compound **SI-6** (2.34 g, 6.86 mmol, 1.00 equiv), Pd(PPh<sub>3</sub>)<sub>2</sub>Cl<sub>2</sub> (96 mg, 0.14 mmol, 2.0 mol %), and CuI (65 mg, 0.34 mmol, 5.0 mol %) were added under positive N<sub>2</sub> flow, followed by 1-hexyne (2.4 mL, 21 mmol, 3.0 equiv). The resulting dark brown solution was stirred at 25 °C for 15 h, at which time analysis by TLC (10% EtOAc/hexanes) suggested full consumption of the starting aryl iodide. [Note: The aryl iodide starting material overlaps the desired Sonogashira product in this solvent system, but the reaction progress can be judged through differential staining by KMnO<sub>4</sub> solution.] The reaction mixture was diluted with 75 mL



EtOAc and washed with saturated aqueous  $\text{NH}_4\text{Cl}$  ( $3 \times 20$  mL), water ( $1 \times 20$  mL), and brine ( $3 \times 20$  mL). The organic layer was dried over  $\text{Na}_2\text{SO}_4$ , filtered, and concentrated in vacuo to a brown oil. Purification by column chromatography using an elution gradient (100% hexanes to 20% EtOAc/hexanes) followed by removal of volatiles at c.a. 10 Torr for 1 h afforded the desired product as a yellow-brown oil (1.91 g, 95% yield).

TLC (10% EtOAc/hexanes):  $R_f = 0.52$ , visualized by UV absorbance and  $\text{KMnO}_4$  stain.

$^1\text{H}$  NMR ( $\text{CDCl}_3$ , 500 MHz):  $\delta$  7.58 (d,  $J = 2.3$  Hz, 1H), 7.40 (dd,  $J = 8.6$  Hz, 2.3 Hz, 1H), 6.94 (d,  $J = 8.6$  Hz, 1H), 2.43 (t,  $J = 7.0$  Hz, 2H), 2.32 (s, 3H), 1.58 (m, 2H), 1.47 (app sextet,  $J = 7.3$  Hz, 2H), 0.95 (t,  $J = 7.4$  Hz, 3H).

$^{13}\text{C}$  NMR ( $\text{CDCl}_3$ , 125 MHz):  $\delta$  168.8, 150.7, 135.8, 131.7, 123.8, 120.3, 118.8, 97.2, 74.5, 30.7, 22.0, 20.9, 19.3, 13.7.

HRMS (GC/ESI): Calculated for  $\text{C}_{14}\text{H}_{19}\text{BrO}_2\text{N}$  ( $[\text{M}+\text{NH}_4]^+$ ), 312.0599; found 312.0600.

**4-Bromo-2-(hex-1-yn-1-yl)phenol (1c).** A stirring suspension of  $\text{K}_2\text{CO}_3$  (1.78 g, 12.9 mmol, 2.00 equiv) in 45 mL MeOH and 35 mL THF was cooled to 0 °C in an ice bath. To the vigorously stirring cold suspension was added solution of acetate **SI-7** (1.90 g, 6.44 mmol, 1.00 equiv) in 10 mL THF dropwise over c.a. 2 min. The reaction mixture was stirred at 0 °C for 30 min, at which time analysis by TLC (10% EtOAc/hexanes) revealed full consumption of the acetate starting material. The reaction mixture was diluted with 100 mL EtOAc, then washed with saturated aqueous  $\text{NH}_4\text{Cl}$  ( $1 \times 30$  mL) and brine ( $3 \times 10$  mL). The organic layer was dried over  $\text{Na}_2\text{SO}_4$ , filtered, and concentrated in vacuo. The resulting oily residue was purified by column chromatography using an elution gradient from 100% hexanes to 10% EtOAc/hexanes. Volatiles were removed at c.a. 10 mTorr overnight with stirring to afford **1c** as a clear yellow oil (1.45 g, 89% yield).

TLC (10% EtOAc/hexanes):  $R_f = 0.40$ , visualized by UV absorbance.

$^1\text{H}$  NMR ( $\text{CDCl}_3$ , 600 MHz):  $\delta$  7.41 (d,  $J = 2.4$  Hz, 1H), 7.29 (dd,  $J = 8.7$  Hz, 2.5 Hz, 1H), 6.82 (d,  $J = 8.7$  Hz, 1H), 5.76 (s, 1H), 2.49 (t,  $J = 7.0$  Hz, 2H), 1.65–1.50 (m, 2H), 1.45 – 1.52 (m, 2H), 0.97 (t,  $J = 7.4$  Hz, 3H).

$^{13}\text{C}$  NMR ( $\text{CDCl}_3$ , 125 MHz):  $\delta$  155.8, 133.8, 132.6, 116.2, 112.5, 111.9, 99.5, 73.5, 30.8, 22.2, 19.4, 13.7.

HRMS (GC/CI): Calculated for  $\text{C}_{12}\text{H}_{13}\text{BrO}$  ( $\text{M}^+$ ), 252.0150; found 252.0148.

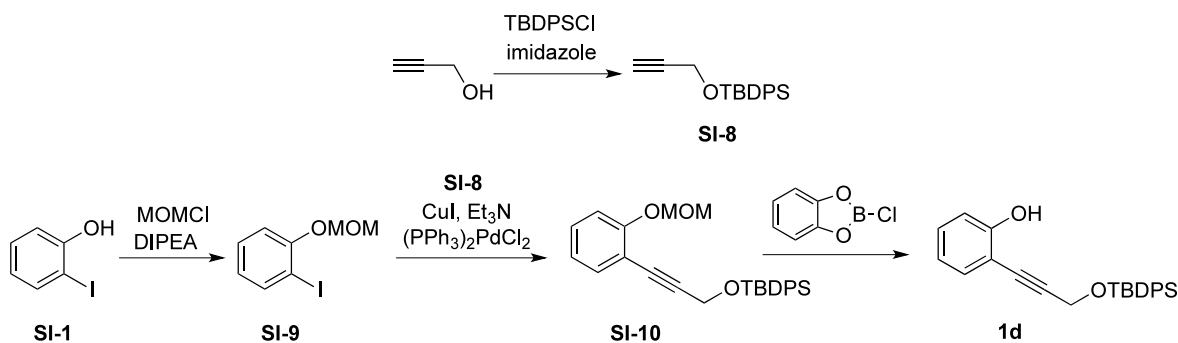

**tert-Butyldiphenyl(prop-2-yn-1-yloxy)silane (SI-8)** was prepared according to a literature procedure<sup>4</sup> in 77% yield. <sup>1</sup>H NMR (CDCl<sub>3</sub>, 500 MHz): δ 7.72 (d, *J* = 6.6 Hz, 4H), 7.33–7.49 (m, 6H), 4.32 (d, *J* = 2.3 Hz, 2H), 2.39 (t, *J* = 2.3 Hz, 1H), 1.07 (s, 9H). This spectrum is in agreement with previously reported spectral data.

**1-Iodo-2-(methoxymethoxy)benzene (SI-9)** was prepared according to a literature procedure<sup>5</sup> in 97% yield. <sup>1</sup>H NMR (CDCl<sub>3</sub>, 600 MHz) δ 7.78 (dd, *J* = 7.8, 1.5 Hz, 1H), 7.26–7.30 (m, 1H), 7.07 (dd, *J* = 8.3, 1.1 Hz, 1H), 6.76 (td, *J* = 7.6, 1.3 Hz, 1H), 5.24 (s, 2H), 3.52 (s, 3H). This spectrum is in agreement with previously reported spectral data.

**tert-Butyl((3-(2-(methoxymethoxy)phenyl)prop-2-yn-1-yl)oxy)diphenylsilane (SI-10).** A flask was charged with compound **SI-9** (1.50 g, 5.67 mmol, 1.00 equiv), (PPh<sub>3</sub>)<sub>2</sub>PdCl<sub>2</sub> (0.20 g, 0.28 mmol, 0.050 equiv), and CuI (0.11 g, 0.57 mmol, 0.10 equiv). The flask was then evacuated and refilled with N<sub>2</sub> three times before Et<sub>3</sub>N (6.3 mL, 45 mmol, 8.0 equiv) was added and stirred for 30 min. A separate flask was charged with compound **SI-8** (2.14 g, 7.28 mmol, 1.30 equiv), and then evacuated and refilled with N<sub>2</sub> three times before adding 11 mL MeCN. The resulting solution was then added dropwise over c.a. 4 min to the stirring reaction mixture, which stirred for 18 h under dynamic N<sub>2</sub>. At this time, analysis by TLC (20% EtOAc/hexanes) indicated full consumption of starting material. The reaction mixture was diluted with 50 mL EtOAc and washed with NH<sub>4</sub>Cl (1 × 15 mL), water (1 × 10 mL), brine (1 × 10 mL), dried over Na<sub>2</sub>SO<sub>4</sub>, filtered, and concentrated in vacuo. The resulting oily residue was purified by column chromatography using an elution gradient from 100% hexanes to 10% EtOAc/hexanes. Product-containing fractions were combined and concentrated in vacuo, and volatiles were removed at c.a. 10 mTorr for 18 h to afford **SI-10** as a light yellow oil (2.18 g, 90% yield).

TLC (10% EtOAc/hexanes): R<sub>f</sub> = 0.38, visualized by UV absorbance and KMnO<sub>4</sub> stain.

<sup>1</sup>H NMR (CDCl<sub>3</sub>, 500 MHz): δ 7.76 (d, *J* = 6.7 Hz, 4H), 7.46–7.35 (m, 6H), 7.32 (d, *J* = 7.6 Hz, 1H), 7.28–7.21 (m, 1H), 7.10 (d, *J* = 8.3 Hz, 1H), 6.95 (t, *J* = 7.5 Hz, 1H), 5.21 (s, 2H), 4.59 (s, 2H), 3.49 (s, 3H), 1.09 (s, 9H).

<sup>13</sup>C NMR (CDCl<sub>3</sub>, 125 MHz): δ 157.9, 135.8, 133.8, 133.4, 129.9, 129.7, 127.8, 121.9, 115.4, 113.8, 95.1, 91.7, 81.5, 56.4, 53.6, 26.9, 19.4.

HRMS (ESI<sup>+</sup>): Calculated for C<sub>27</sub>H<sub>30</sub>O<sub>3</sub>SiNa ([M+Na]<sup>+</sup>), 453.1862; found 453.1844.

**2-(3-((*tert*-Butyldiphenylsilyl)oxy)prop-1-yn-1-yl)phenol (1d).** To a stirring solution of *B*-chlorocatecholborane (0.34 g, 2.2 mmol, 1.2 equiv) in 15 mL DCM was added **SI-10** (0.80 g, 1.9 mmol, 1.0 equiv) in 4 mL DCM. The reaction mixture was stirred for 4.5 h under dynamic N<sub>2</sub>. At this time, analysis by TLC (10% EtOAc/hexanes) indicated full consumption of starting material. The reaction mixture was diluted with 50 mL DCM, and the organic layer was washed with NH<sub>4</sub>Cl (1 × 10 mL), brine (1 × 10 mL), dried over Na<sub>2</sub>SO<sub>4</sub>, filtered, and concentrated in vacuo. The resulting oily residue was purified by column chromatography using an elution gradient from 100% hexanes to 10% EtOAc/hexanes. Product-containing fractions were combined and concentrated in vacuo, and volatiles were removed at c.a. 10 mTorr for 18 h to afford **1d** as a light yellow oil (320 mg, 45% yield).

TLC (10% EtOAc/hexanes): R<sub>f</sub> = 0.32, visualized by UV absorbance and KMnO<sub>4</sub> stain.

<sup>1</sup>H NMR (CDCl<sub>3</sub>, 500 MHz): δ 7.74 (d, *J* = 6.7 Hz, 4H), 7.47–7.44 (m, 2H), 7.42–7.40 (m, 4H), 7.24 (t, *J* = 7.8 Hz, 2H), 6.91 (d, *J* = 7.9 Hz, 1H), 6.84 (t, *J* = 7.5 Hz, 1H), 5.55 (s, 1H), 4.60 (s, 2H), 1.08 (s, 9H).

<sup>13</sup>C NMR (CDCl<sub>3</sub>, 125 MHz): δ 156.9, 135.8, 133.1, 132.0, 130.6, 130.1, 128.0, 120.3, 114.8, 109.2, 95.0, 79.3, 53.3, 26.8, 19.3.

HRMS (ESI<sup>+</sup>): Calculated for C<sub>25</sub>H<sub>26</sub>O<sub>2</sub>SiNa ([M+Na]<sup>+</sup>), 409.1600; found 409.1584.

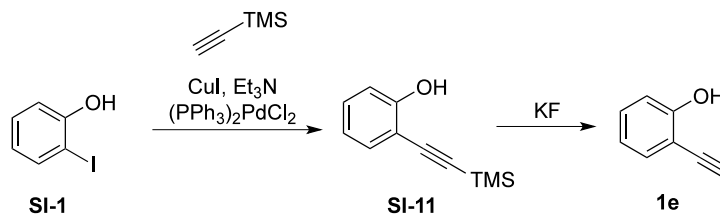

**2-((Trimethylsilyl)ethynyl)phenol (SI-11)** was prepared according to a literature procedure<sup>6</sup> in 71% yield. <sup>1</sup>H NMR (CDCl<sub>3</sub>, 600MHz) δ 7.34 (dd, *J* = 7.6, 1.5 Hz, 1H), 7.26–7.22 (m, 1H), 6.94 (d, *J* = 8.2 Hz, 1H), 6.85 (t, *J* = 6.0 Hz, 1H), 5.82 (s, 1H), 0.28 (s, 9H). This spectrum is in agreement with previously reported spectral data.

**2-Ethynylphenol (1e)** was prepared according to a literature procedure<sup>6</sup> in 82% yield. <sup>1</sup>H NMR (CDCl<sub>3</sub>, 600MHz) δ 7.38 (dd, *J* = 7.7, 1.4 Hz, 1H), 7.30–7.26 (dt, *J* = 7.8, 1.2 Hz, 1H), 6.96 (d, *J* = 8.2 Hz, 1H), 6.88 (dt, *J* = 7.5, 0.8 Hz, 1H), 5.77 (s, 1H), 3.47 (s, 1H). This spectrum is in agreement with previously reported spectral data.

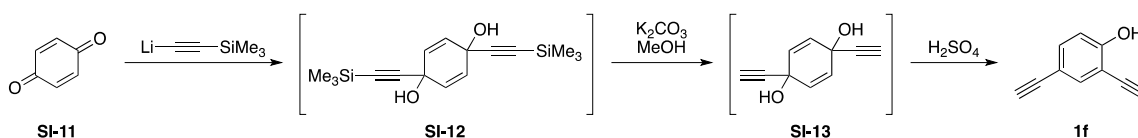

**1,4-Bis((trimethylsilyl)ethynyl)cyclohexa-2,5-diene-1,4-diol (SI-12).** Anhydrous THF (60 mL) was cooled to  $-78\text{ }^{\circ}\text{C}$  in a dry ice/isopropanol bath under a dynamic  $\text{N}_2$  atmosphere. A solution of  $n\text{BuLi}$  (1.0 M in hexanes, 50. mL, 50. mmol, 2.2 equiv) was cannulated slowly into the reaction vessel. To the resulting stirring solution was then added trimethylsilyl acetylene (7.1 mL, 50. mmol, 2.2 equiv) dropwise over 30 min. After stirring an additional 30 min to affect complete deprotonation of the terminal alkyne, a solution of 1,4-benzoquinone (2.45 g, 22.7 mmol, 1.00 equiv) in 20. mL anhydrous THF was added dropwise over 30 min. During this addition, the reaction mixture turned from a clear, pale yellow solution to a dark, teal solution. The reaction mixture was stirred for 18 h as the cooling bath warmed gradually to  $25\text{ }^{\circ}\text{C}$ . After this time, the resulting red-brown semisolid reaction mixture was cooled to  $0\text{ }^{\circ}\text{C}$ , and 100 mL EtOAc was added with vigorous agitation to break up the solid aggregate. Saturated aqueous  $\text{NH}_4\text{Cl}$  (50 mL) was added to quench the reaction mixture, and then the pH was further adjusted to  $\text{pH} = 5$  with c.a. 1 mL 2 N aqueous HCl. The resulting biphasic mixture was separated, and the organic layer was extracted with EtOAc ( $2 \times 50\text{ mL}$ ). The combined organic phases were dried over  $\text{Na}_2\text{SO}_4$ , filtered, and concentrated in vacuo to afford a tan solid. Volatiles were removed at  $25\text{ }^{\circ}\text{C}$  and c.a. 10 mTorr for 2 h to afford crude **SI-12** as a tan solid (6.08 g) in 70% purity. Crude **SI-12** was used without further purification or characterization.

**1,4-Diethynylcyclohexa-2,5-diene-1,4-diol (SI-13).** A suspension of  $\text{K}_2\text{CO}_3$  (5.5 g, 40. mmol, 4.0 equiv) in MeOH (50 mL) was cooled to  $0\text{ }^{\circ}\text{C}$  in an ice bath open to air. Solid **SI-12** (3.0 g, 9.9 mmol, 1.0 equiv) was added portionwise over c.a. 1 min, and the resulting mixture was stirred vigorously at  $0\text{ }^{\circ}\text{C}$  for 1.5 h, at which time analysis by TLC (30% EtOAc/hexanes) indicated full consumption of **SI-12**. The reaction mixture was warmed to  $25\text{ }^{\circ}\text{C}$  and was decanted away from excess  $\text{K}_2\text{CO}_3$ . The resulting solution was diluted with 50 mL EtOAc and was then washed with saturated aqueous  $\text{NH}_4\text{Cl}$  ( $3 \times 10\text{ mL}$ ). The organic phase was dried over  $\text{Na}_2\text{SO}_4$ , filtered, and concentrated in vacuo to a tan solid containing crude **SI-13**, which was used directly in the next step without purification or characterization.

**2,4-Diethynylphenol (1f)** was prepared using a method adapted from Ried and Schmidt.<sup>7</sup> Crude **SI-13** was dissolved in 10 mL benzene, and to the resulting solution were added  $\text{H}_2\text{O}$  (10 mL) and 1 mL 1 N aqueous  $\text{H}_2\text{SO}_4$  (1 mmol, 10 mol %). The resulting biphasic mixture was refluxed under air with vigorous stirring for 20 min. After cooling to  $25\text{ }^{\circ}\text{C}$ , the biphasic mixture was separated, and the aqueous layer was extracted with benzene ( $3 \times 5\text{ mL}$ ). The combined organic layers were dried over  $\text{Na}_2\text{SO}_4$ , filtered, and concentrated in vacuo to a brown oil, which was purified by column chromatography using an elution gradient from 100% hexanes to 20%. The purified product was dried at  $25\text{ }^{\circ}\text{C}$  and c.a. 10 mTorr for 18 h to afford **1f** as a cream-colored solid (160 mg, 12% yield over 2 steps).

TLC (20% EtOAc/hexanes):  $R_f = 0.43$ , visualized by  $\text{KMnO}_4$  stain.

$^1\text{H}$  NMR ( $\text{CDCl}_3$ , 600 MHz):  $\delta$  7.33 (d,  $J$  = 7.9 Hz, 1H), 7.09 (d,  $J$  = 1.1 Hz, 1H), 7.02 (dd,  $J$  = 8.0, 1.3 Hz, 1H), 5.79 (s, 1H), 3.55 (s, 1H), 3.16 (s, 1H).

$^{13}\text{C}$  NMR ( $\text{CDCl}_3$ , 125 MHz):  $\delta$  157.1, 132.0, 124.7, 124.4, 118.5, 109.2, 86.0, 82.9, 79.2, 77.8.

HRMS (GC/ESI $^+$ ): Calculated for  $\text{C}_{10}\text{H}_{10}\text{NO}$  ( $[\text{M}+\text{NH}_4]^+$ ), 160.0762; found 160.0764.

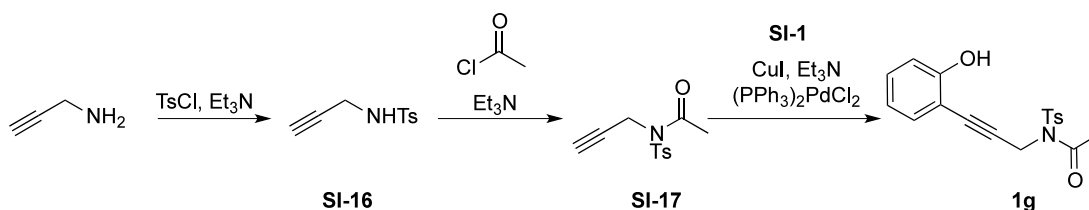

**4-Ethyl-*N*-(prop-2-yn-1-yl)benzenesulfonamide (SI-16)** was prepared according to a literature procedure<sup>8</sup> in 91% yield.  $^1\text{H}$  NMR ( $\text{CDCl}_3$ , 600 MHz)  $\delta$  7.77 (d,  $J$  = 8.2 Hz, 2H), 7.31 (d,  $J$  = 7.9 Hz, 2H), 4.66 (br s, 1H), 3.83 (dd,  $J$  = 6.0, 2.5 Hz, 2H), 2.43 (s, 3H), 2.10 (t,  $J$  = 2.4 Hz, 1H). This spectrum is in agreement with previously reported spectral data.

***N*-(Prop-2-yn-1-yl)-*N*-tosylacetamide (SI-17).** A flask was charged with **SI-16** (1.29 g, 6.16 mmol, 1.00 equiv),  $\text{Et}_3\text{N}$  (2.6 mL, 19 mmol, 3.0 equiv), and 13 mL DCM before it was cooled to 0 °C in an ice bath. At this time, acetyl chloride (0.88 mL, 12 mmol, 2.0 equiv) was syringed into the stirring reaction vessel over 3 min. The ice bath was removed, and the reaction mixture was stirred for 18 h before TLC (30% EtOAc/hexanes) revealed complete consumption of starting material. The reaction was quenched with 10 mL  $\text{H}_2\text{O}$ , and the aqueous layer was extracted with DCM ( $2 \times 10$  mL). The combined organic layers were washed with brine ( $1 \times 10$  mL), and then dried over  $\text{Na}_2\text{SO}_4$ , filtered, and concentrated in vacuo. The resulting oily residue was purified by column chromatography using an elution gradient from 100% hexanes to 35% EtOAc/hexanes. Product-containing fractions were combined and concentrated in vacuo, and volatiles were removed at c.a. 10 mTorr for 18 h to afford **SI-17** as a light yellow solid (1.1 g, 72% yield).  $^1\text{H}$  NMR ( $\text{CDCl}_3$ , 600MHz)  $\delta$  7.91 (d,  $J$  = 8.4 Hz, 2H), 7.35 (d,  $J$  = 8.2 Hz, 2H), 4.67 (d,  $J$  = 2.3 Hz, 2H), 2.45 (s, 3H), 2.33 (s, 3H), 2.28 (t,  $J$  = 2.4 Hz, 1H). This spectrum is in agreement with previously reported spectral data.<sup>9</sup>

***N*-(3-(2-Hydroxyphenyl)prop-2-yn-1-yl)-*N*-tosylacetamide (1g).** A Schlenk tube was charged with **SI-1** (0.71 g, 3.2 mmol, 1.0 equiv),  $(\text{PPh}_3)_2\text{PdCl}_2$  (23 mg, 0.032 mmol, 1.0 mol %),  $\text{CuI}$  (13 mg, 0.064 mmol, 2.0 mol %), and a stir bar. The tube was then evacuated and refilled with  $\text{N}_2$  three times before the addition of  $\text{Et}_3\text{N}$  (1.8 mL, 13 mmol, 4.0 equiv) and 4 mL dioxane, and then stirred for 5 min. Compound **SI-17** (1.05 g, 4.18 mmol, 1.30 equiv) was added over positive  $\text{N}_2$  pressure. The Schlenk tube was heated to 45 °C under dynamic  $\text{N}_2$ . After 4 h, analysis by TLC (30% EtOAc/hexanes) revealed complete consumption of starting material. To the flask was added 10 mL water, and the aqueous phase was extracted with EtOAc ( $2 \times 30$  mL). The combined organic layers were washed with brine ( $1 \times 10$  mL), dried over  $\text{Na}_2\text{SO}_4$ , filtered, and concentrated in vacuo. The resulting oily residue was purified by column chromatography using an elution gradient from 100% hexanes to 30% EtOAc/hexanes. Product-containing fractions

were combined and concentrated in vacuo, and volatiles were removed at c.a. 10 mTorr for 18 h to afford **1g** as a light yellow solid (0.15 g, 14% yield).

TLC (30% EtOAc/hexanes)  $R_f$  = 0.31, visualized by UV absorbance.

$^1\text{H}$  NMR ( $\text{CDCl}_3$ , 600 MHz):  $\delta$  7.88 (d,  $J$  = 8.2 Hz, 2H), 7.33 (d,  $J$  = 8.1 Hz, 2H), 7.23 (td,  $J$  = 6.7, 1.5 Hz, 2H), 6.92 (d,  $J$  = 8.1 Hz, 1H), 6.84 (t,  $J$  = 7.5 Hz, 1H), 5.92 (br. s, 1H), 4.88 (s, 2H), 2.42 (s, 3H), 2.41 (s, 3H).

$^{13}\text{C}$  NMR ( $d_8$ -toluene, 125 MHz):  $\delta$  169.2, 158.9, 144.8, 137.1, 131.7, 131.0, 129.9, 125.4, 120.1, 115.4, 109.0, 91.9, 79.2, 36.2, 24.4, 21.0.

HRMS (ESI $^+$ ): Calculated for  $\text{C}_{18}\text{H}_{17}\text{NO}_4\text{SNa}$  ( $[\text{M}+\text{Na}]^+$ ), 366.0776; found 366.0768.

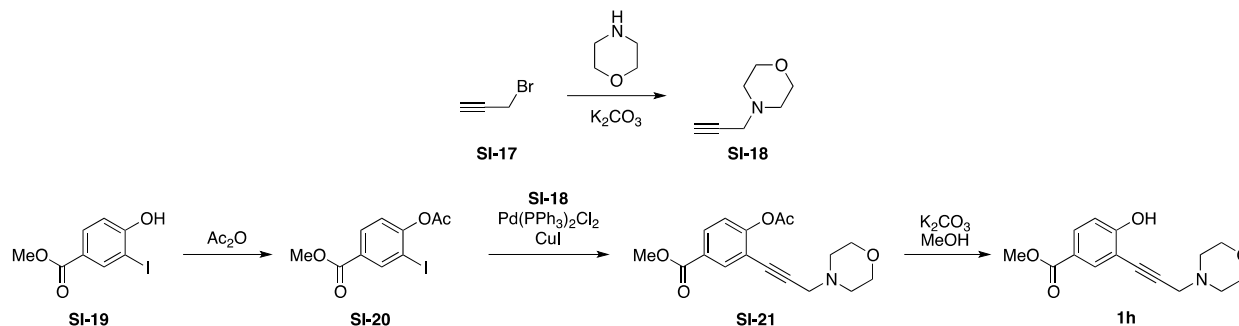

**4-(Prop-2-yn-1-yl)morpholine (SI-18)** was prepared by adding propargyl bromide (80 wt % in toluene, 15 g solution, 100 mmol, 1.0 equiv) dropwise over 20 min to a stirring suspension of morpholine (22 mL, 250 mmol, 2.5 equiv) and  $\text{K}_2\text{CO}_3$  (35 g, 250 mmol, 2.5 equiv) in THF (100 mL) at 25 °C. The resulting mixture was stirred vigorously for 18 h, at which point the reaction mixture was diluted with 200 mL EtOAc. The mixture was washed with water (1  $\times$  60 mL) and brine (3  $\times$  20 mL), then the combined aqueous layers were back extracted with DCM (1  $\times$  20 mL). The combined organic layers were dried over  $\text{Na}_2\text{SO}_4$ , filtered, and concentrated in vacuo to a yellow-orange oil. Purification by Kugelrohr distillation, (250 Torr, 150 °C) afforded **SI-18** as a clear, colorless oil (9.85 g, 79% yield).  $^1\text{H}$  NMR ( $\text{CDCl}_3$ , 500 MHz):  $\delta$  3.74 (app t,  $J$  = 4.8 Hz, 4H), 3.29 (d,  $J$  = 2.5 Hz, 2H), 2.57 (app t,  $J$  = 4.7 Hz, 4H), 2.27 (t,  $J$  = 2.5 Hz, 1H). This spectrum is in agreement with previously reported spectral data.<sup>10</sup>

**Methyl 4-acetoxy-3-iodobenzoate (SI-20).** A solution of iodophenol **SI-19** (5.00 g, 18.0 mmol, 1.00 equiv) and 4-dimethylaminopyridine (DMAP, 110 mg, 0.90 mmol, 5.0 mol %) in  $\text{Et}_3\text{N}$  (3.0 mL, 22 mmol, 1.2 equiv) and DCM (20 mL) was cooled to 0 °C in an ice bath. Neat acetic anhydride (2.0 mL, 22 mmol, 1.2 equiv) was added dropwise over c.a. 1 min, and then the cooling bath was removed. The reaction mixture was stirred at 25 °C while vented to air with a needle for 2 h. At this time, analysis by TLC (20% EtOAc/hexanes) indicated full conversion to a single new product. The reaction mixture was washed with water (1  $\times$  40 mL), and then the aqueous layer was back extracted with DCM (3  $\times$  15 mL). The combined organic layers were washed with brine (3  $\times$  3 mL), dried over  $\text{Na}_2\text{SO}_4$ , filtered, and concentrated in vacuo to a colorless oil, which was purified by silica gel chromatography using an elution gradient from

100% hexanes to 10% EtOAc/hexanes. Volatiles were removed from the purified product at c.a. 10 mTorr for 2.5 h to afford **SI-20** as a white powder (5.41 g, 94% yield). <sup>1</sup>H NMR (CDCl<sub>3</sub>, 600 MHz): δ 8.52 (d, *J* = 1.8 Hz, 1H), 8.05 (dd, *J* = 8.4, 1.9 Hz, 1H), 7.18 (d, *J* = 8.4 Hz, 1H), 3.93 (s, 3H), 2.40 (s, 3H). This spectrum is in agreement with previously reported spectral data.<sup>11</sup>

**Methyl 4-acetoxy-3-(3-morpholinoprop-1-yn-1-yl)benzoate (SI-21).** A solution of **SI-20** (480. mg, 1.50 mmol, 1.00 equiv) in Et<sub>3</sub>N (4 mL) was sparged with N<sub>2</sub> for 25 min. PdCl<sub>2</sub>(PPh<sub>3</sub>)<sub>2</sub> (18 mg, 0.026 mmol, 2.0 mol %) and CuI (12 mg, 0.065 mmol, 5.0 mol %) were added under positive N<sub>2</sub> flow, and to the resulting mixture was then added neat terminal alkyne **SI-18** (197 mg, 1.58 mmol, 1.05 equiv). The reaction mixture was then heated at 45 °C for 16 h. At this time, analysis by TLC (20% EtOAc/hexanes) indicated complete consumption of the starting aryl iodide. The reaction mixture was diluted with 10 mL DCM, then washed with water (1 × 15 mL) and brine (1 × 15 mL), and then the combined aqueous layers were back extracted with DCM (1 × 5 mL). The combined organic layers were dried over Na<sub>2</sub>SO<sub>4</sub>, filtered, and concentrated in vacuo. The resulting brown oil was purified by silica gel chromatography using an elution gradient from 100% hexanes to 100% EtOAc. Volatiles were removed from the purified product at c.a. 10 mTorr for 18 h to afford **SI-21** as a viscous, yellow-brown oil (223 mg, 55% yield) containing trace residual EtOAc.

<sup>1</sup>H NMR (CDCl<sub>3</sub>, 500 MHz): δ 8.17 (d, *J* = 2.5 Hz, 1H), 8.00 (dd, *J* = 10.2, 2.5 Hz, 1H), 7.18 (d, *J* = 10.1 Hz, 1H), 3.92 (s, 3H), 3.77 (app t, *J* = 5.5 Hz, 4H), 3.56 (s, 2H), 2.64 (app t, *J* = 5.5 Hz, 4H), 2.37 (s, 3H).

<sup>13</sup>C NMR (CDCl<sub>3</sub>, 125 MHz): δ 168.5, 165.8, 155.0, 135.0, 130.8, 128.1, 122.6, 117.6, 90.1, 80.0, 67.0, 52.5, 52.3, 48.1, 21.1.

HRMS (ESI<sup>+</sup>): Calculated for C<sub>17</sub>H<sub>19</sub>NO<sub>5</sub>Na ([M+Na]<sup>+</sup>), 340.1161; found 340.1167.

**Methyl 4-hydroxy-3-(3-morpholinoprop-1-yn-1-yl)benzoate (1h).** A solution of **SI-21** (1.27 g, 4.00 mmol, 1.00 equiv) in THF (30 mL) was cooled to 0 °C in an ice bath. Solid K<sub>2</sub>CO<sub>3</sub> (1.1 g, 8.0 mmol, 2.0 equiv) was added followed by slow addition of MeOH (30 mL). After completion of the addition, the reaction mixture was warmed slowly to 25 °C and was stirred vigorously for 2 h. At this time, analysis by TLC (5% MeOH/CHCl<sub>3</sub>) indicated complete consumption of the starting acetate. The reaction mixture was diluted with 150 mL DCM and washed with water (1 × 30 mL) and brine (1 × 30 mL). The combined aqueous layers were back-extracted with DCM (1 × 30 mL), and then the combined organic layers were dried over Na<sub>2</sub>SO<sub>4</sub>, filtered, and concentrated in vacuo to a pale yellow oil. The oil was purified by silica gel chromatography using an elution gradient from 100% CHCl<sub>3</sub> to 5 % MeOH/CHCl<sub>3</sub>. Volatiles were removed from the purified product at c.a. 10 mTorr for 18 h to afford **1h** as a cream-colored solid (175 mg, 16% yield).

<sup>1</sup>H NMR (CDCl<sub>3</sub>, 600 MHz): δ 8.07 (d, *J* = 2.1 Hz, 1H), 7.94 (d, *J* = 8.6, 2.1 Hz, 1H), 6.98 (d, *J* = 8.6 Hz, 1H), 6.27 (br s, 1H), 3.90 (s, 3H), 3.78 (app t, *J* = 4.6 Hz, 4H), 3.60 (s, 2H), 2.65 (app t, *J* = 4.5 Hz, 4H).

<sup>13</sup>C NMR (CDCl<sub>3</sub>, 125 MHz): δ 166.3, 160.5, 134.2, 132.2, 122.8, 114.9, 109.6, 92.2, 79.0, 66.9, 52.6, 52.2, 48.3.

HRMS (ESI<sup>+</sup>): Calculated for C<sub>15</sub>H<sub>17</sub>NO<sub>4</sub>Na ([M+Na]<sup>+</sup>), 298.1055; found 298.1055.

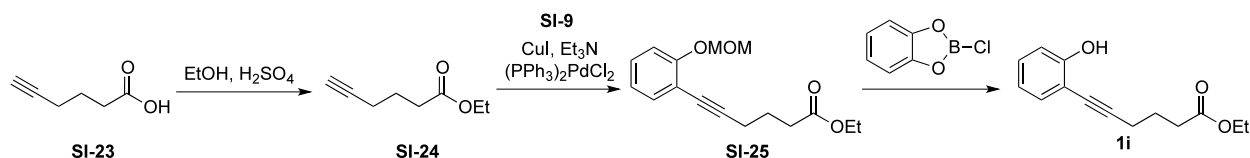

**Ethyl hex-5-ynoate (SI-24)** was prepared according to a literature procedure<sup>12</sup> in 87% yield. <sup>1</sup>H NMR (CDCl<sub>3</sub>, 600MHz) δ 4.14 (q, *J* = 7.1 Hz, 2H), 2.44 (t, *J* = 7.4 Hz, 2H), 2.27 (dt, *J* = 7.0, 2.6 Hz, 2H), 1.97 (t, *J* = 2.6 Hz, 1H), 1.85 (quin, *J* = 7.2 Hz, 1H), 1.26 (t, *J* = 7.2 Hz, 3H). This spectrum is in agreement with previously reported spectral data.

**Ethyl 6-(2-(methoxymethoxy)phenyl)hex-5-ynoate (SI-25).** A flask was charged with **SI-9** (1.05 g, 3.98 mmol, 1.00 equiv), (PPh<sub>3</sub>)<sub>2</sub>PdCl<sub>2</sub> (0.14 g, 0.20 mmol, 0.050 equiv), and CuI (76 mg, 0.40 mmol, 0.10 equiv). The flask was then evacuated and refilled with N<sub>2</sub> three times before Et<sub>3</sub>N (4.4 mL, 32 mmol, 8.0 equiv) and 5 mL MeCN were added, and this mixture was stirred for 30 min. Compound **SI-24** (0.98 g, 5.2 mmol, 1.30 equiv) was added dropwise by syringe over 2 min. The reaction mixture was stirred for 18 h under dynamic N<sub>2</sub>. At this time, analysis by TLC (30% EtOAc/hexanes) indicated full consumption of starting material. The reaction mixture was diluted with 50 mL DCM, and the organic layer was washed with NH<sub>4</sub>Cl (1 × 15 mL), water (1 × 10 mL), brine (1 × 10 mL), dried over Na<sub>2</sub>SO<sub>4</sub>, filtered, and concentrated in vacuo. The resulting oily residue was purified by column chromatography using an elution gradient from 100% hexanes to 40% EtOAc/hexanes. Product-containing fractions were combined and concentrated in vacuo, and volatiles were removed at c.a. 10 mTorr for 18 h to afford **SI-25** as a light yellow oil (0.97 g, 88% yield).

TLC (30% EtOAc/hexanes) R<sub>f</sub> = 0.42, visualized by UV absorbance.

<sup>1</sup>H NMR (CDCl<sub>3</sub>, 600 MHz): δ 7.37 (dd, *J* = 7.6, 1.5 Hz, 1H), 7.22 (td, *J* = 7.8, 1.2 Hz, 1H), 7.08 (d, *J* = 8.2 Hz, 1H), 6.94 (t, *J* = 7.5 Hz, 1H), 5.24 (s, 2H), 4.14 (q, *J* = 7.0 Hz, 2H), 3.52 (s, 3H), 2.59–2.48 (m, 2H), 1.95 (quin, *J* = 7.2 Hz, 2H), 1.26 (t, *J* = 7.2 Hz, 3H).

<sup>13</sup>C NMR (CDCl<sub>3</sub>, 125 MHz): δ 173.4, 157.8, 133.6, 129.1, 121.9, 115.3, 114.4, 95.1, 93.2, 77.7, 60.5, 56.4, 32.2, 24.1, 19.3, 14.4.

HRMS (ESI<sup>+</sup>): Calculated for C<sub>16</sub>H<sub>20</sub>O<sub>4</sub>Na ([M+Na]<sup>+</sup>), 299.1259; found 299.1255.

**Ethyl 6-(2-hydroxyphenyl)hex-5-ynoate (1i).** A flask was charged with **SI-25** (1.6 g, 5.8 mmol, 1.0 equiv), 58 mL DCM, and a stir bar. *B*-Chlorocatecholborane (1.2 g, 7.5 mmol, 1.3 equiv) was then added, and the mixture was sparged with N<sub>2</sub> for 10 min. The reaction mixture stirred for 18 h under dynamic N<sub>2</sub>. At this time, analysis by TLC (20% EtOAc/hexanes) indicated complete consumption of starting material. The reaction mixture was diluted with 100 mL DCM and washed with water (3 × 30 mL) and brine (1 × 30 mL). The organic layer was dried over Na<sub>2</sub>SO<sub>4</sub>, filtered, and concentrated in vacuo. The resulting oily residue was purified by column chromatography using an elution gradient from 100% hexanes to 20% EtOAc/hexanes. Product-



containing fractions were combined and concentrated in vacuo, and volatiles were removed at c.a. 10 mTorr for 18 h to afford **1i** as a light yellow oil (1.2 g, 87% yield).

TLC (20% EtOAc/hexanes)  $R_f$  = 0.33, visualized by UV absorbance.

$^1\text{H}$  NMR ( $\text{CDCl}_3$ , 600 MHz):  $\delta$  7.28 (dd,  $J$  = 7.6, 1.5 Hz, 1H), 7.21 (t,  $J$  = 7.8 Hz, 1H), 6.93 (d,  $J$  = 8.2 Hz, 1H), 6.84 (t,  $J$  = 7.5 Hz, 1H), 5.99 (s, 1H), 4.16 (q,  $J$  = 7.2 Hz, 2H), 2.57 (t,  $J$  = 6.9 Hz, 2H), 2.51 (t,  $J$  = 7.2 Hz, 2H), 1.97 (quin,  $J$  = 7.0 Hz, 2H), 1.26 (t,  $J$  = 7.2 Hz, 3H).

$^{13}\text{C}$  NMR ( $\text{CDCl}_3$ , 125 MHz):  $\delta$  173.5, 156.9, 131.7, 129.9, 120.3, 114.7, 110.0, 96.2, 75.9, 60.8, 33.4, 23.8, 19.2, 14.4.

HRMS (CI): Calculated for  $\text{C}_{14}\text{H}_{17}\text{O}_3$  ( $[\text{M}+\text{H}]^+$ ), 233.1178; found 233.1182.

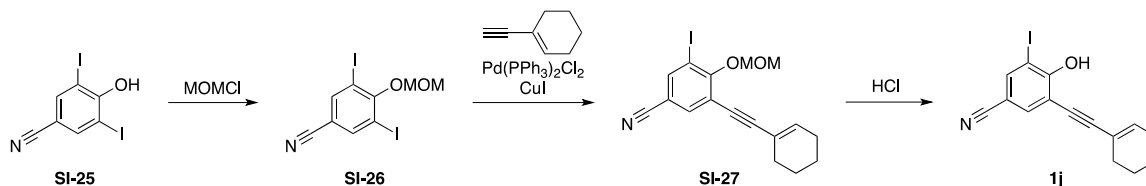

**3,5-Diiodo-4-(methoxymethoxy)benzonitrile (SI-26).** A solution of **SI-25** (742 mg, 2.00 mmol, 1.00 equiv) and *N,N*-diisopropylethylamine (700.  $\mu\text{L}$ , 4.00 mmol, 2.00 equiv) in DCM (40 mL) was cooled to 0  $^\circ\text{C}$  under dynamic  $\text{N}_2$  atmosphere. Chloromethyl methyl ether (210  $\mu\text{L}$ , 2.8 mmol, 1.4 equiv) was then added dropwise. The reaction mixture was stirred at 0  $^\circ\text{C}$  for 40 min. It was then warmed gradually to 25  $^\circ\text{C}$  was stirred for 15 h, at which time analysis by TLC (20% EtOAc/hexanes) indicated full consumption of the phenol starting material. The reaction mixture was diluted with 20 mL EtOAc and 10 mL  $\text{H}_2\text{O}$ . The resulting biphasic mixture was stirred vigorously for 20 min to quench unreacted MOMCl, and then the phases were separated. The organic layer was washed with  $\text{H}_2\text{O}$  ( $2 \times 10$  mL) and brine ( $1 \times 10$  mL), dried over  $\text{Na}_2\text{SO}_4$ , filtered, and concentrated in vacuo to a pale yellow solid (780 mg, 94% yield).

$^1\text{H}$  NMR ( $\text{CDCl}_3$ , 500 MHz):  $\delta$  8.08 (s, 2H), 5.22 (s, 2H), 3.75 (s, 3H).

$^{13}\text{C}$  NMR ( $\text{CDCl}_3$ , 125 MHz):  $\delta$  161.1, 143.4, 115.4, 111.8, 100.9, 91.7, 59.2.

HRMS (GC/CI): Calculated for  $\text{C}_9\text{H}_{11}\text{I}_2\text{N}_2\text{O}_2$  ( $[\text{M}+\text{NH}_4]^+$ ), 432.8910; found 432.8896.

**3-(Cyclohex-1-en-1-ylethynyl)-5-iodo-4-(methoxymethoxy)benzonitrile (SI-27).** A mixture of THF (24 mL) and  $\text{Et}_3\text{N}$  (2.6 mL, 19 mmol, 5.0 equiv) was sparged with  $\text{N}_2$  for 20 min. Solid **SI-26** (1.56 g, 3.76 mmol, 1.00 equiv),  $\text{Pd}(\text{PPh}_3)_2\text{Cl}_2$  (66 mg, 0.094 mmol, 2.5 mol %), and  $\text{CuI}$  (36 mg, 0.19 mmol, 5.0 mol %) were added under positive  $\text{N}_2$  pressure. To the resulting solution was added 1-ethynylcyclohexene (463  $\mu\text{L}$ , 3.95 mmol, 1.05 equiv). The reaction mixture was stirred at 25  $^\circ\text{C}$  for 20 h, at which time analysis by TLC (10% EtOAc/hexanes) indicated complete consumption of **SI-26**. The reaction mixture was diluted with 100 mL EtOAc, then washed with saturated aqueous  $\text{NH}_4\text{Cl}$  ( $3 \times 20$  mL) and brine ( $2 \times 20$  mL). The organic phase was dried over  $\text{Na}_2\text{SO}_4$ , filtered, and concentrated in vacuo to an orange semisolid, which was purified using three successive silica gel chromatography columns using an elution gradient from 100% hexanes to 10% EtOAc/hexanes. Volatiles were removed at 25  $^\circ\text{C}$  and c.a. 10 mTorr for 18 h to afford **SI-27** as a yellow oil in 90% purity (249 mg, 17% yield).

$^1\text{H}$  NMR ( $\text{CDCl}_3$ , 500 MHz):  $\delta$  7.98 (d,  $J$  = 2.0 Hz, 1H), 7.66 (d,  $J$  = 2.0 Hz, 1H), 6.27 (m, 1H), 5.44 (s, 2H), 3.68 (s, 3H), 2.23–2.15 (m, 4H), 1.72–1.61 (m, 4H).

$^{13}\text{C}$  NMR ( $\text{CDCl}_3$ , 125 MHz):  $\delta$  161.0, 141.9, 137.7, 137.6, 120.1, 118.4, 116.6, 109.3, 99.6, 98.9, 92.5, 81.0, 58.9, 28.8, 26.0, 22.2, 21.4.

HRMS (ESI<sup>+</sup>): Calculated for  $\text{C}_{17}\text{H}_{16}\text{INO}_2\text{Na}$  ( $[\text{M}+\text{Na}]^+$ ), 416.0108; found 416.0124.

**3-(Cyclohex-1-en-1-ylethynyl)-4-hydroxy-5-iodobenzonitrile (1j).** To a solution of **SI-27** (91 mg, 0.23 mmol, 1.0 equiv) in 2 mL DCM at 25 °C was added  $\text{HCl}\cdot\text{Et}_2\text{O}$  (280  $\mu\text{L}$ , 1.2 equiv). The reaction mixture was stirred for 3 h, at which time analysis by TLC (10% EtOAc/hexanes) revealed complete consumption of the MOM ether starting material. The reaction mixture was diluted with 10 mL EtOAc and washed with water ( $3 \times 2$  mL) and brine ( $3 \times 2$  mL). The organic layer was dried over  $\text{Na}_2\text{SO}_4$ , filtered, and concentrated in vacuo to a pale yellow oil. The product was purified by silica gel chromatography using an elution gradient from 100% hexanes to 10% EtOAc/hexanes. Volatiles were removed at 25 °C and c.a. 10 mTorr for 18 h to afford **1j** as a white solid (45 mg, 55% yield).

$^1\text{H}$  NMR ( $\text{CDCl}_3$ , 500 MHz):  $\delta$  7.92 (d,  $J$  = 2.3 Hz, 1H), 7.60 (d,  $J$  = 2.3 Hz, 1H), 6.67 (br s, 1H), 6.35–6.32 (m, 1H), 2.24–2.16 (m, 4H), 1.74–1.62 (m, 4H).

$^{13}\text{C}$  NMR ( $\text{CDCl}_3$ , 125 MHz):  $\delta$  159.0, 142.3, 138.8, 135.3, 119.5, 117.0, 106.1, 101.1, 81.9, 78.1, 29.0, 26.0, 22.2, 21.3.

HRMS (GC/CI): Calculated for  $\text{C}_{15}\text{H}_{12}\text{INO}$  ( $\text{M}^+$ ), 348.9964; found 348.9967.

## B. Screen of potential alkoxyboration catalysts

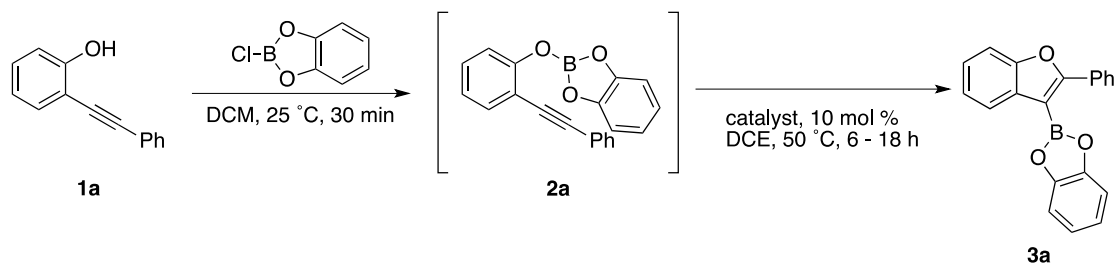

**Boric ester 2a.** A flame-dried 25-mL Schlenk tube was charged with a solution of **1a** (97.0 mg, 0.500 mmol, 1.00 equiv) in dry DCM (3 mL). To this solution was then added a solution of *B*-chlorocatecholborane (77.0 mg, 0.500 mmol, 1.00 equiv) in dry DCM (3 mL) at 25 °C. The reaction mixture was stirred for 30 min, and then the mixture was concentrated in vacuo to afford a moisture-sensitive, clear brown oil (159 mg, quant.) containing **2a**, which was used directly in the catalyst screen without further purification.

$^1\text{H}$  NMR ( $d_8$ -toluene, 600 MHz):  $\delta$  7.38 (dd,  $J$  = 7.6, 1.6 Hz, 1H), 7.23–7.21 (m, 2H), 6.98 (dd,  $J$  = 10.2, 1.4 Hz, 1H), 6.92 (td,  $J$  = 8.7, 2.9 Hz, 1H), 6.86–6.84 (m, 3H), 6.82 (dd,  $J$  = 5.8, 3.4 Hz, 2H), 6.76 (td,  $J$  = 15.1, 9.5 Hz), 6.74 ( $J$  = 5.8, 3.4 Hz, 2H).

$^{11}\text{B}$  NMR ( $d_8$ -toluene, 193 MHz):  $\delta$  23.2 (br s).

Catalyst screening reactions were set up in an N<sub>2</sub>-filled glovebox. Catalyst (0.0040 mmol, 10. mol %) was dissolved in anhydrous 1,2-dichloroethane (400  $\mu$ L) and added to a dram vial containing **2a** (13 mg, 0.040 mmol, 1.0 equiv). After mixing thoroughly, the reaction mixture was transferred to a J. Young NMR tube, removed from the glovebox, and heated in a preheated 50 °C oil bath. After heating for the indicated time, the progress of the reaction was monitored by <sup>1</sup>H and <sup>11</sup>B NMR spectroscopy.

| Entry | Catalyst                                                               | Product : Starting Material Ratio ( <b>3a:2a</b> , <sup>1</sup> H NMR) |
|-------|------------------------------------------------------------------------|------------------------------------------------------------------------|
| 1     | None                                                                   | Only <b>2a</b>                                                         |
| 2     | Pd(PPh <sub>3</sub> ) <sub>2</sub> Cl <sub>2</sub><br>+ 20 mol % AgOTf | Only <b>2a</b>                                                         |
| 3     | PEPPSI-IPr<br>+ 20 mol % AgOTf                                         | Only <b>2a</b>                                                         |
| 4     | IPrAuCl<br>+ 10 mol % AgOTf                                            | > 95:5                                                                 |
| 5     | IPrAuCl                                                                | Only <b>2a</b>                                                         |
| 6     | AgOTf                                                                  | Only <b>2a</b>                                                         |
| 7     | IPrAuCl<br>+ 10 mol % AgTFA                                            | > 95:5                                                                 |
| 8     | IPrCuCl<br>+ 10 mol % AgTFA                                            | Only <b>2a</b>                                                         |
| 9     | Trifluoroacetic acid                                                   | Only <b>2a</b>                                                         |
| 10    | InBr <sub>3</sub>                                                      | Only <b>2a</b>                                                         |

**Table SI-1.** Screen of alkoxyboration catalysts for optimal conversion to **3a** by <sup>1</sup>H NMR spectroscopy.

### C. Synthesis and isolation of benzofuran alkoxyboration products **4a–4j**

*Note:* All alkoxyboration reactions were conducted in a N<sub>2</sub>-filled glovebox due to the high moisture sensitivity of the boric ester intermediate **2**. All glassware and reagents must be rigorously dry for optimal yield. The reaction progress was monitored by removing a small aliquot of the reaction mixture from the glovebox and diluting it in 1:1 EtOAc:water. This results in rapid hydrolysis of boric ester intermediate **2** back to the phenol starting material **1**. Thus, co-spotting the reaction mixture versus phenol **1** provides a convenient method for determining whether or not intermediate **2** has been fully consumed. The addition of PPh<sub>3</sub> to quench the Au catalyst.<sup>13</sup> between the alkoxyboration step and the formation of the organotrifluoroborate or MIDA boronate was essential.

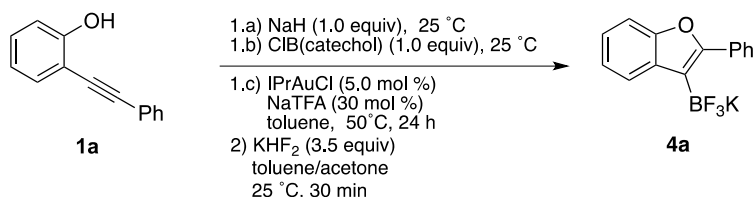

**Benzofuran trifluoroborate 4a.** A solution of phenol **1a** (97.0 mg, 0.500 mmol, 1.00 equiv) in 1.0 mL toluene was added to a flame-dried 10-mL Schlenk tube. To this stirring solution was added dropwise at 25 °C a suspension of NaH (69 wt % purity, 17.4 mg, 0.500 mmol, 1.00 equiv) in 0.5 mL toluene over 2 min. A suspension of NaTFA (20. mg, 0.15 mmol, 30. mol %) in 0.5 mL toluene was added next, and the resulting suspension was stirred for 15 min to affect full deprotonation.

To the resulting stirring sodium phenoxide suspension was added at 25 °C a solution of *B*-chlorocatecholborane (77.0 mg, 0.500 mmol, 1.00 equiv) in toluene (1.0 mL), using additional toluene as a rinse to ensure full transfer (2 × 0.5 mL portions). The resulting suspension was stirred vigorously for 30 min to allow for full conversion to boric ester intermediate **2a**.

Next, a suspension of IPrAuCl (16 mg, 0.025 mmol, 5.0 mol %) in toluene (0.5 mL) was added to the reaction mixture at 25 °C, using additional toluene as a rinse to aid in full transfer (1 × 0.5 mL portion). The reaction mixture was then sealed with a ground glass stopper and a PTFE sealing ring and placed in a preheated 50 °C copper shot heating bath. The final concentration of the reaction mixture was 0.1 M in **1a**.

After 24 h, analysis by TLC (20% EtOAc/hexanes) indicated full consumption of boric ester intermediate **2a**. The reaction mixture was cooled to 25 °C, and a solution of PPh<sub>3</sub> (13 mg, 0.050 mmol, 10 mol %) in toluene (0.5 mL) was added. The resulting suspension was stirred for 22 h at 25 °C in order to quench IPrAuTFA before proceeding.

The quenched reaction mixture was removed from the glovebox and filtered through a fiberglass filter to remove the suspended solids. The filter was then rinsed with toluene (3 × 3 mL), and the combined filtrates were concentrated in vacuo to a pale yellow powder, which was suspended in acetone (4.5 mL) and added to a stirring solution of KHF<sub>2</sub> (140 mg, 1.8 mmol, 3.5 equiv) in water (1.5 mL). The resulting mixture was stirred at 25 °C for 30 min, and then concentrated in vacuo to remove the solvents. To this residue was added 2 mL Et<sub>2</sub>O and subsequently concentrated at c.a. 10 mTorr for 30 min in order to remove residual acetone. The resulting pale yellow solid residue was washed with Et<sub>2</sub>O (4 × 2 mL) and extracted with acetone (4 × 2 mL). The combined acetone extracts were concentrated in vacuo, and the resulting residue was subjected to an additional washing/extraction cycle to yield **4a** as a white powder (113 mg, 75% yield) after removing volatiles at 25 °C and c.a. 10 mTorr for 18 h.

<sup>1</sup>H NMR (*d*<sub>6</sub>-DMSO, 600 MHz): δ 8.10 (d, *J* = 7.4 Hz, 2H), 7.88 (d, *J* = 7.7 Hz, 1H), 7.42 (d, *J* = 8.0 Hz, 1H), 7.38 (t, *J* = 7.6 Hz, 2H), 7.26 (t, *J* = 7.3 Hz, 1H), 7.13 (td, *J* = 6.5 Hz, 1.2 Hz, 1H), 7.08 (td, *J* = 7.4, 0.9 Hz, 1H).

<sup>13</sup>C NMR (*d*<sub>6</sub>-DMSO, 125 MHz): δ 154.7 (q, *J*<sub>C-F</sub> = 4.6 Hz), 153.8, 135.4, 133.3, 127.9, 126.8, 126.7 (q, *J*<sub>C-F</sub> = 2.3 Hz), 124.1 (q, *J*<sub>C-F</sub> = 2.8 Hz), 122.7, 109.6. [Note: As with many organotrifluoroborates, the *ipso* carbon was not detected, presumably due to broadening

through coupling to the  $^{11}\text{B}$  nucleus. The quaternary carbon at the benzofuran 2 position was also not detected.]

$^{11}\text{B}$  NMR ( $d_6$ -DMSO, 193 MHz):  $\delta$  3.2 (br s).

$^{19}\text{F}$  NMR ( $d_6$ -DMSO, 376 MHz):  $\delta$  -131.9 (br s).

HRMS (ESI-): Calculated for  $\text{C}_{14}\text{H}_9\text{BF}_3\text{O}$  ( $[\text{M}-\text{K}]^-$ ), 261.0701; found 261.0706.

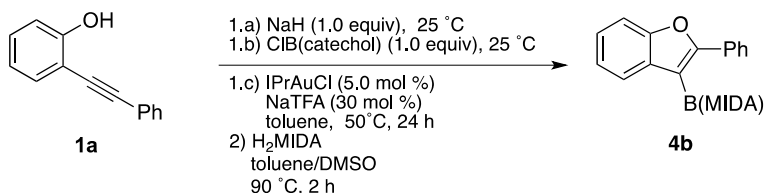

**MIDA boronate 4b.** A solution of phenol **1a** (97.0 mg, 0.500 mmol, 1.00 equiv) in 1.0 mL toluene was added to a flame-dried 10-mL Schlenk tube. To this stirring solution was added dropwise at 25 °C a suspension of NaH (92 wt % purity, 13.0 mg, 0.500 mmol, 1.00 equiv) in 0.5 mL toluene over 2 min. A suspension of NaTFA (20. mg, 0.15 mmol, 30 mol %) in 0.5 mL toluene was added next, and the resulting suspension was stirred for 15 min to affect full deprotonation.

To the resulting stirring sodium phenoxide suspension was added at 25 °C a solution of *B*-chlorocatecholborane (77.0 mg, 0.500 mmol, 1.00 equiv) in toluene (1.0 mL), using additional toluene as a rinse to ensure full transfer ( $2 \times 0.5$  mL portions). The resulting suspension was stirred vigorously for 30 min to allow for full conversion to boric ester intermediate **2a**.

Next, a suspension of IPrAuCl (16 mg, 0.025 mmol, 5.0 mol %) in toluene (0.5 mL) was added to the reaction mixture at 25 °C, using additional toluene as a rinse to aid in full transfer ( $1 \times 0.5$  mL portion). The reaction mixture was then sealed with a ground glass stopper and a PTFE sealing ring and placed in a preheated 50 °C copper shot heating bath. The final concentration of the reaction mixture was 0.1 M in **1a**.

After 24 h, analysis by TLC (20% EtOAc/hexanes) indicated full consumption of boric ester intermediate **2a**. The reaction mixture was cooled to 25 °C, and a solution of  $\text{PPh}_3$  (13 mg, 0.050 mmol, 10 mol %) in toluene (0.5 mL) was added. The resulting suspension was stirred for 16 h at 25 °C in order to quench IPrAuTFA before proceeding.

Anhydrous DMSO (2.0 mL) and  $\text{H}_2\text{MIDA}$  (81 mg, 0.55 mmol, 1.1 equiv) were added to the quenched alkoxyboration reaction mixture, and the resulting suspension was stirred at 90 °C for 2 h. The reaction mixture was then cooled to 25 °C and removed from the glovebox. Toluene was removed in vacuo at 25 °C and c.a. 10 Torr, then DMSO was removed by Kugelrohr distillation at c.a. 10 mTorr. The resulting semisolid residue was adsorbed onto Celite from a MeCN suspension and purified by silica gel chromatography using an elution gradient from 100%  $\text{Et}_2\text{O}$  to 100% MeCN. Removal of volatiles at 25 °C and c.a. 10 mTorr for 18 h afforded MIDA boronate **4b** as a white powder (101 mg, 58% yield). Crystals suitable for X-ray diffraction analysis were prepared by slow diffusion of  $\text{Et}_2\text{O}$  into a saturated solution of **4b** in  $\text{Et}_2\text{O}$ /acetone at 25 °C over 3 days

TLC (10% MeCN/  $\text{Et}_2\text{O}$ ):  $R_f$  = 0.39.

$^1\text{H}$  NMR ( $\text{CD}_3\text{CN}$ , 600 MHz):  $\delta$  7.72 (dd,  $J$  = 7.8 Hz, 0.8 Hz, 1H), 7.67–7.65 (m, 2H), 7.55 (d,  $J$  = 9.7 Hz, 1H), 7.47–7.44 (m, 3H), 7.35–7.31 (m, 1H), 7.29–7.26 (m, 1H), 3.97 (d,  $J$  = 17.1 Hz, 2H), 3.65 (d,  $J$  = 17.1 Hz, 2H), 2.56 (s, 3H).

$^{13}\text{C}$  NMR ( $\text{CD}_3\text{CN}$ , 125 MHz):  $\delta$  169.0, 156.0, 133.6, 133.0, 130.6, 130.2, 129.3, 125.2, 123.9, 123.5, 111.8, 63.0, 48.2. [Note: no signals were observed for the quaternary C–B *ipso* carbon or the quaternary carbon at the benzofuran 2 position.]

$^{11}\text{B}$  NMR ( $\text{CD}_3\text{CN}$ , 193 MHz):  $\delta$  11.3 (br s).

HRMS (ESI $^{+}$ ): Calculated for  $\text{C}_{17}\text{H}_{19}\text{BBrNO}_5$  ( $[\text{M}+\text{Na}]^{+}$ ), 372.1023; found 372.1016.

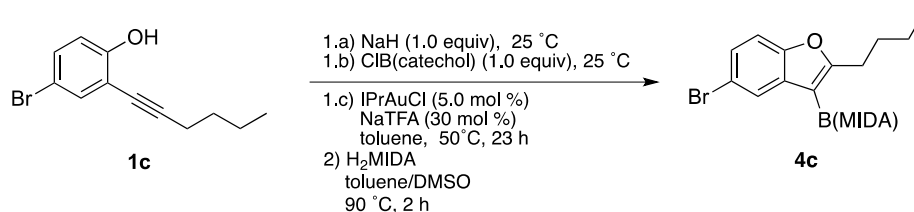

**MIDA boronate 4c.** A solution of phenol **1c** (127 mg, 0.500 mmol, 1.00 equiv) in 1.0 mL toluene was added to a flame-dried 10-mL Schlenk tube. To this stirring solution was added dropwise at 25 °C a suspension of NaH (92 wt % purity, 13.0 mg, 0.500 mmol, 1.00 equiv) in 0.5 mL toluene over 2 min. A suspension of NaTFA (20. mg, 0.15 mmol, 30 mol %) in 0.5 mL toluene was added next, and the resulting suspension was stirred for 15 min to affect full deprotonation.

To the resulting stirring sodium phenoxide suspension was added at 25 °C a solution of *B*-chlorocatecholborane (77.0 mg, 0.500 mmol, 1.00 equiv) in toluene (1.0 mL), using additional toluene as a rinse to ensure full transfer ( $2 \times 0.5$  mL portions). The resulting suspension was stirred vigorously for 30 min to allow for full conversion to boric ester intermediate **2c**.

Next, a suspension of IPrAuCl (16 mg, 0.025 mmol, 5.0 mol %) in toluene (0.5 mL) was added to the reaction mixture at 25 °C, using additional toluene as a rinse to aid in full transfer ( $1 \times 0.5$  mL portion). The reaction mixture was then sealed with a ground glass stopper and a PTFE sealing ring and placed in a preheated 50 °C copper shot heating bath. The final concentration of the reaction mixture was 0.1 M in **1c**.

After 23 h, analysis by TLC (20% EtOAc/hexanes) indicated full consumption of boric ester intermediate **2c**. The reaction mixture was cooled to 25 °C, and a solution of  $\text{PPh}_3$  (13 mg, 0.050 mmol, 10 mol %) in toluene (0.5 mL) was added. The resulting suspension was stirred for 16 h at 25 °C in order to quench IPrAuTFA before proceeding.

Anhydrous DMSO (2.0 mL) and  $\text{H}_2\text{MIDA}$  (160 mg, 1.1 mmol, 2.2 equiv) were added to the quenched alkoxyboration reaction mixture, and the resulting suspension was stirred at 90 °C for 2h. The reaction mixture was then cooled to 25 °C and removed from the glovebox. Toluene was removed in vacuo at 25 °C and c.a. 10 Torr, then DMSO was removed by Kugelrohr distillation at c.a. 10 mTorr. The resulting semisolid residue was adsorbed onto Celite from a MeCN suspension and purified by silica gel chromatography using an elution gradient from 100% Et<sub>2</sub>O to 100% MeCN. Removal of volatiles at 25 °C and c.a. 10 mTorr for 18 h afforded MIDA boronate **4b** as a white powder (161 mg, 79% yield).

TLC (10% MeCN/ Et<sub>2</sub>O): R<sub>f</sub> = 0.50.

<sup>1</sup>H NMR (CD<sub>3</sub>CN, 600 MHz): δ 7.59 (dd, *J* = 1.9 Hz, 0.4 Hz, 1H), 7.37 (d, *J* = 7.4 Hz, 1H), 7.34 (dd, *J* = 8.7 Hz, 1.8 Hz, 1H), 4.12 (d, *J* = 17.2 Hz, 2H), 3.92 (d, *J* = 17.2 Hz, 2H), 2.77 (app t, *J* = 7.7 Hz, 2H), 2.66 (s, 3H), 1.70 (app quintet, *J* = 7.7 Hz, 2H), 1.38 (sextet, *J* = 7.4 Hz, 2H), 0.93 (t, *J* = 7.4 Hz, 3H).

<sup>13</sup>C NMR (CD<sub>3</sub>CN, 125 MHz): δ 169.4, 167.4, 154.6, 135.6, 126.8, 124.9, 116.1, 113.1, 63.0, 48.1, 31.6, 29.0, 23.2, 14.0. [Note: no signal was observed for the quaternary C–B *ipso* carbon.]

<sup>11</sup>B NMR (CD<sub>3</sub>CN, 193 MHz): δ 11.3 (br s).

HRMS (ESI<sup>+</sup>): Calculated for C<sub>16</sub>H<sub>17</sub>BBrNO<sub>5</sub>Na ([M+Na]<sup>+</sup>), 430.0441; found 430.0425.

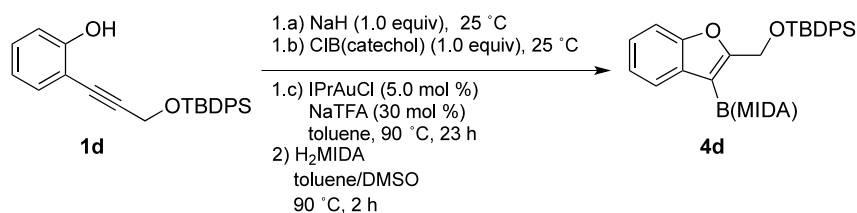

**MIDA boronate 4d.** A solution of phenol **1d** (85 mg, 0.22 mmol, 1.0 equiv) in 1.0 mL toluene was added to a flame-dried 10-mL Schlenk tube. To this stirring solution was added dropwise at 25 °C a suspension of NaH (92 wt % purity, 6.0 mg, 0.20 mmol, 1.0 equiv) in 0.5 mL toluene over 2 min. A suspension of NaTFA (9.0 mg, 0.070 mmol, 30 mol %) in 0.5 mL toluene was added next, and the resulting suspension was stirred for 45 min to affect full deprotonation.

To the resulting stirring sodium phenoxide suspension was added at 25 °C a solution of *B*-chlorocatecholborane (34 mg, 0.22 mmol, 1.0 equiv) in toluene (1.0 mL), using additional toluene as a rinse to ensure full transfer (2 × 0.5 mL portions). The resulting suspension was stirred vigorously for 30 min to allow for full conversion to boric ester intermediate **2d**.

Next, a suspension of IPrAuCl (7.0 mg, 0.010 mmol, 5.0 mol %) in toluene (0.5 mL) was added to the reaction mixture at 25 °C, using additional toluene as a rinse to aid in full transfer (1 × 0.5 mL portion). The reaction mixture was then sealed with a ground glass stopper and a PTFE sealing ring and placed in a preheated 50 °C copper shot heating bath. The final concentration of the reaction mixture was 0.1 M in **1d**.

After 23 h, analysis by TLC (20% EtOAc/hexanes) indicated full consumption of boric ester intermediate **2d**. The reaction mixture was cooled to 25 °C, and a solution of PPh<sub>3</sub> (6.0 mg, 0.020 mmol, 10 mol %) in toluene (0.5 mL) was added. The resulting suspension was stirred for 16 h at 25 °C in order to quench IPrAuTFA before proceeding.

Anhydrous DMSO (2.0 mL) and H<sub>2</sub>MIDA (35 mg, 0.24 mmol, 1.1 equiv) were added to the quenched alkoxyboration reaction mixture, and the resulting suspension was stirred at 90 °C for 2 h. The reaction mixture was then cooled to 25 °C and removed from the glovebox. Toluene was removed in vacuo at 25 °C and c.a. 10 Torr, then DMSO was removed by Kugelrohr distillation at c.a. 10 mTorr. The resulting semisolid residue was adsorbed onto Celite from a MeCN suspension and purified by silica gel chromatography using an elution gradient from

100% Et<sub>2</sub>O to 100% MeCN. Removal of volatiles at 25 °C and c.a. 10 mTorr for 18 h afforded MIDA boronate **4d** as a white powder (32 mg, 48% yield).

TLC (20% MeCN/Et<sub>2</sub>O): R<sub>f</sub> = 0.50, visualized by UV absorbance.

<sup>1</sup>H NMR (CD<sub>3</sub>CN, 600 MHz): δ 7.74 (dd, *J* = 7.8, 1.2 Hz, 4H), 7.56 (d, *J* = 7.6 Hz, 1H), 7.51–7.46 (m, 3H), 7.46–7.40 (m, 4H), 7.32 (dt, *J* = 7.2, 1.2 Hz, 1H), 7.25 (t, *J* = 7.6 Hz, 1H), 4.87 (s, 2 H), 4.24 (d, *J* = 17.2 Hz, 2H), 3.92 (d, *J* = 17.2 Hz, 2H), 2.63 (s, 3 H), 1.02 (s, 9 H)

<sup>13</sup>C NMR (CD<sub>3</sub>CN, 125 MHz): δ 169.3, 161.7, 156.0, 136.5, 133.9, 132.7, 131.0, 128.8, 125.4, 123.8, 123.1, 111.9, 62.7, 59.6, 48.3, 27.1, 19.8. [Note: no signal was observed for the quaternary C–B *ipso* carbon.]

<sup>11</sup>B NMR (CD<sub>3</sub>CN, 193 MHz): δ 11.2.

HRMS (ESI<sup>+</sup>): Calculated for C<sub>30</sub>H<sub>32</sub>O<sub>6</sub>BNSiNa ([M+Na]<sup>+</sup>), 564.1995; found 564.1995.

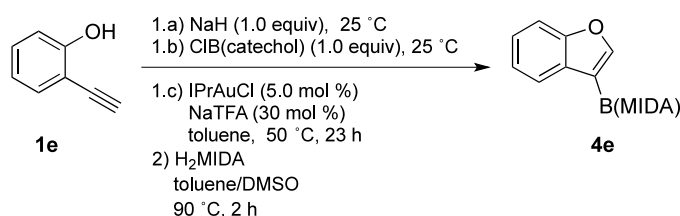

**MIDA boronate 4e.** A solution of phenol **1e** (90. mg, 0.76 mmol, 1.0 equiv) in 1.5 mL toluene was added to a flame-dried 10-mL Schlenk tube. To this stirring solution was added dropwise at 25 °C a suspension of NaH (92 wt % purity, 20. mg, 0.76 mmol, 1.00 equiv) in 1.0 mL toluene over 2 min. A suspension of NaTFA (31 mg, 0.23 mmol, 30 mol %) in 0.5 mL toluene was added next, and the resulting suspension was stirred for 15 min to affect full deprotonation.

To the resulting stirring sodium phenoxide suspension was added at 25 °C a solution of *B*-chlorocatecholborane (120 mg, 0.76 mmol, 1.0 equiv) in toluene (1.5 mL), using additional toluene as a rinse to ensure full transfer (2 × 0.5 mL portions). The resulting suspension was stirred vigorously for 30 min to allow for full conversion to boric ester intermediate **2e**.

Next, a suspension of IPrAuCl (25 mg, 0.040 mmol, 5.0 mol %) in toluene (0.5 mL) was added to the reaction mixture at 25 °C, using additional toluene as a rinse to aid in full transfer (3 × 0.5 mL portion). The reaction mixture was then sealed with a ground glass stopper and a PTFE sealing ring and placed in a preheated 50 °C copper shot heating bath. The final concentration of the reaction mixture was 0.1 M in **1e**.

After 23 h, analysis by TLC (20% EtOAc/hexanes) indicated full consumption of boric ester intermediate **2e**. The reaction mixture was cooled to 25 °C, and a solution of PPh<sub>3</sub> (20. mg, 0.080 mmol, 10 mol %) in toluene (0.5 mL) was added. The resulting suspension was stirred for 16 h at 25 °C in order to quench IPrAuTFA before proceeding.

Anhydrous DMSO (2.0 mL) and H<sub>2</sub>MIDA (124 mg, 0.84 mmol, 1.1 equiv) were added to the quenched alkoxyboration reaction mixture, and the resulting suspension was stirred at 90 °C for 2h. The reaction mixture was then cooled to 25 °C and removed from the glovebox. Toluene was removed in vacuo at 25 °C and c.a. 10 Torr, then DMSO was removed by Kugelrohr distillation at c.a. 10 mTorr. The resulting semisolid residue was adsorbed onto Celite from a MeCN



suspension and purified by silica gel chromatography using an elution gradient from 100% Et<sub>2</sub>O to 100% MeCN. Removal of volatiles at 25 °C and c.a. 10 mTorr for 18 h afforded MIDA boronate **4e** as an off-white powder (82 mg, 40% yield).

TLC (20% MeCN/Et<sub>2</sub>O): R<sub>f</sub> = 0.58, visualized by UV absorbance.

<sup>1</sup>H NMR (CD<sub>3</sub>CN, 600 MHz): δ 7.75 (s, 1H), 7.59 (d, *J* = 7.7 Hz, 1H), 7.55 (d, *J* = 8.1 Hz, 1H), 7.32 (t, *J* = 8.4 Hz, 1H), 7.26 (t, *J* = 9.0 Hz, 1H), 4.12 (d, *J* = 17.2 Hz, 2H), 3.95 (d, *J* = 17.2 Hz, 2H), 2.67 (s, 3H).

<sup>13</sup>C NMR (CD<sub>3</sub>CN, 125 MHz): δ 169.3, 157.0, 151.7, 131.1, 125.2, 123.9, 122.9, 112.2, 62.6, 48.1. [Note: no signal was observed for the quaternary C–B *ipso* carbon.]

<sup>11</sup>B NMR (CD<sub>3</sub>CN, 193 MHz): δ 11.2 (br s).

HRMS (ESI<sup>+</sup>): Calculated for C<sub>12</sub>H<sub>12</sub>BNO<sub>5</sub>Na ([M+Na]<sup>+</sup>), 296.0709; found 296.0714.

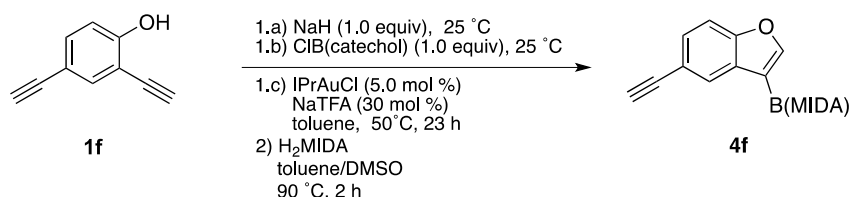

**MIDA boronate 4f.** A solution of phenol **1f** (71.0 mg, 0.500 mmol, 1.00 equiv) in 1.0 mL toluene was added to a flame-dried 10-mL Schlenk tube. To this stirring solution was added dropwise at 25 °C a suspension of NaH (92 wt % purity, 13.0 mg, 0.500 mmol, 1.00 equiv) in 0.5 mL toluene over 2 min. A suspension of NaTFA (20. mg, 0.15 mmol, 30 mol %) in 0.5 mL toluene was added next, and the resulting suspension was stirred for 15 min to affect full deprotonation.

To the resulting stirring sodium phenoxide suspension was added at 25 °C a solution of *B*-chlorocatecholborane (77.0 mg, 0.500 mmol, 1.00 equiv) in toluene (1.0 mL), using additional toluene as a rinse to ensure full transfer (2 × 0.5 mL portions). The resulting suspension was stirred vigorously for 30 min to allow for full conversion to boric ester intermediate **2f**.

Next, a suspension of IPrAuCl (16 mg, 0.025 mmol, 5.0 mol %) in toluene (0.5 mL) was added to the reaction mixture at 25 °C, using additional toluene as a rinse to aid in full transfer (1 × 0.5 mL portion). The reaction mixture was then sealed with a ground glass stopper and a PTFE sealing ring and placed in a preheated 50 °C copper shot heating bath. The final concentration of the reaction mixture was 0.1 M in **1f**.

After 23 h, analysis by TLC (20% EtOAc/hexanes) indicated full consumption of boric ester intermediate **2f**. The reaction mixture was cooled to 25 °C, and a solution of PPh<sub>3</sub> (13 mg, 0.050 mmol, 10 mol %) in toluene (0.5 mL) was added. The resulting suspension was stirred for 16 h at 25 °C in order to quench IPrAuTFA before proceeding.

Anhydrous DMSO (2.0 mL) and H<sub>2</sub>MIDA (160 mg, 1.1 mmol, 2.2 equiv) were added to the quenched alkoxyboration reaction mixture, and the resulting suspension was stirred at 90 °C for 2h. The reaction mixture was then cooled to 25 °C and removed from the glovebox. Toluene was removed in vacuo at 25 °C and c.a. 10 Torr, then DMSO was removed by Kugelrohr distillation

at c.a. 10 mTorr. The resulting semisolid residue was adsorbed onto Celite from a MeCN suspension and purified by silica gel chromatography using an elution gradient from 100% Et<sub>2</sub>O to 100% MeCN. Removal of volatiles at 25 °C and c.a. 10 mTorr for 18 h afforded MIDA boronate **4f** as a white powder (52 mg, 35% yield).

TLC (20% MeCN/ Et<sub>2</sub>O): R<sub>f</sub> = 0.50.

<sup>1</sup>H NMR (CD<sub>3</sub>CN, 600 MHz): δ 7.82 (s, 1H), 7.69 (s, 1H), 7.57 (d, *J* = 8.1 Hz, 1H), 7.38 (dd, *J* = 7.1, 1.3 Hz, 1H), 4.12 (d, *J* = 17.2 Hz, 2H), 3.94 (d, *J* = 17.2 Hz, 2H), 3.40 (s, 1H), 2.66 (s, 3H).

<sup>13</sup>C NMR (CD<sub>3</sub>CN, 125 MHz): δ 169.2, 156.4, 153.3, 132.1, 127.9, 123.1, 115.8, 84.4, 78.5, 62.6, 48.2. [Note: no signals were observed for the quaternary C–B *ipso* carbon and a second quaternary carbon.]

 $^{11}\text{B}$  NMR ( $\text{CD}_3\text{CN}$ , 193 MHz):  $\delta$  11.0 (br s).

HRMS (ESI+): Calculated for  $C_{15}H_{12}BNO_5Na$  ( $[M+Na]^+$ ), 320.0709; found 320.0713.

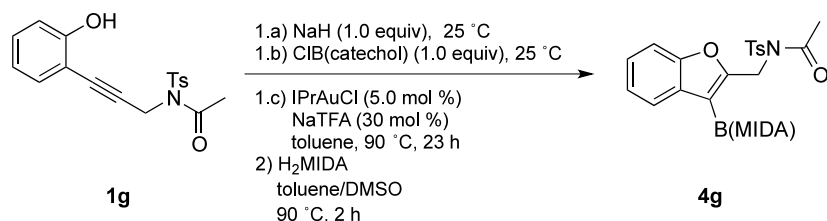

**MIDA boronate 4g.** A solution of phenol **1g** (99 mg, 0.29 mmol, 1.0 equiv) in 0.5 mL toluene was added to a flame-dried 10-mL Schlenk tube. To this stirring solution was added dropwise at 25 °C a suspension of NaH (92 wt % purity, 8.0 mg, 0.50 mmol, 1.0 equiv) in 0.5 mL toluene over 2 min. A suspension of NaTFA (9.0 mg, 0.090 mmol, 30. mol %) in 0.5 mL toluene was added next, and the resulting suspension was stirred for 15 min to affect full deprotonation.

To the resulting stirring sodium phenoxide suspension was added at 25 °C a solution of *B*-chlorocatecholborane (45 mg, 0.29 mmol, 1.0 equiv) in toluene (0.5 mL), using additional toluene as a rinse to ensure full transfer (1 × 0.3 mL portion). The resulting suspension was stirred vigorously for 30 min to allow for full conversion to boric ester intermediate **2g**.

Next, a suspension of IPrAuCl (9.0 mg, 0.010 mmol, 5.0 mol %) in toluene (0.5 mL) was added to the reaction mixture at 25 °C, using additional toluene as a rinse to aid in full transfer (1 × 0.2 mL portion). The reaction mixture was then sealed with a ground glass stopper and a PTFE sealing ring and placed in a preheated 90 °C copper shot heating bath. The final concentration of the reaction mixture was 0.1 M in **1g**.

After 23 h, analysis by TLC (20% EtOAc/hexanes) indicated full consumption of boric ester intermediate **2g**. The reaction mixture was cooled to 25 °C, and a solution of PPh<sub>3</sub> (8.0 mg, 0.030 mmol, 10. mol %) in toluene (0.5 mL) was added. The resulting suspension was stirred for 16 h at 25 °C in order to quench IPrAuTFA before proceeding.

Anhydrous DMSO (2.0 mL) and H<sub>2</sub>MIDA (52 mg, 0.35 mmol, 1.1 equiv) were added to the quenched alkoxyboration reaction mixture, and the resulting suspension was stirred at 90 °C for 2h. The reaction mixture was then cooled to 25 °C and removed from the glovebox. Toluene was

removed in vacuo at 25 °C and c.a. 10 Torr, then DMSO was removed by Kugelrohr distillation at c.a. 10 mTorr. The resulting semisolid residue was adsorbed onto Celite from a MeCN suspension and purified by silica gel chromatography using an elution gradient from 100% Et<sub>2</sub>O to 100% MeCN. Removal of volatiles at 25 °C and c.a. 10 mTorr for 18 h afforded MIDA boronate **4g** as a white powder (59 mg, 41% yield).

TLC (20% MeCN/Et<sub>2</sub>O): R<sub>f</sub> = 0.58, visualized by UV absorbance.

<sup>1</sup>H NMR (CD<sub>3</sub>CN, 600 MHz): δ 7.70 (d, *J* = 8.3 Hz, 2H), 7.47 (d, *J* = 7.6 Hz, 1H), 7.40 (d, *J* = 7.9 Hz, 1H), 7.34–7.29 (m, 3H), 7.26 (t, *J* = 7.2 Hz, 1H), 5.28 (s, 2H), 4.19 (d, *J* = 21.0 Hz, 2H), 4.12 (d, *J* = 21.0 Hz, 2H), 2.76 (s, 3H), 2.39 (s, 3H), 2.35 (s, 3H).

<sup>13</sup>C NMR (CD<sub>3</sub>CN, 125 MHz): δ 171.7, 169.6, 158.2, 155.6, 146.4, 137.2, 132.3, 130.6, 129.0, 125.4, 124.1, 122.9, 111.9, 64.0, 49.0, 44.5, 25.0, 21.6. [Note: no signal was observed for the quaternary C–B *ipso* carbon.]

<sup>11</sup>B NMR (CD<sub>3</sub>CN, 193 MHz): δ 11.3.

HRMS (ESI<sup>+</sup>): Calculated for C<sub>23</sub>H<sub>23</sub>BN<sub>2</sub>O<sub>8</sub>SNa ([M+Na]<sup>+</sup>), 521.1170; found 521.1153.

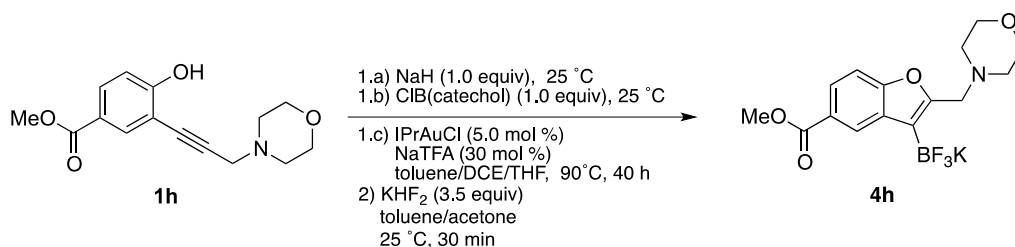

**Benzofuran trifluoroborate 4h.** A solution of phenol **1h** (138 mg, 0.500 mmol, 1.00 equiv) in 1.0 mL toluene was added to a flame-dried 10-mL Schlenk tube. To this stirring solution was added dropwise at 25 °C a suspension of NaH (92 wt % purity, 13.0 mg, 0.500 mmol, 1.00 equiv) in 0.5 mL toluene over 2 min. A suspension of NaTFA (20. mg, 0.15 mmol, 30 mol %) in 0.5 mL toluene was added next. Due to the low solubility of **1h** in toluene, dry dichloroethane (0.5 mL) and dry THF (1.0 mL) were added. The resulting suspension was stirred for 15 min to affect full deprotonation.

To the resulting stirring sodium phenoxide suspension was added at 25 °C a solution of *B*-chlorocatecholborane (77.0 mg, 0.500 mmol, 1.00 equiv) in toluene (0.5 mL), using additional toluene as a rinse to ensure full transfer (1 × 0.5 mL portions). The resulting suspension was stirred vigorously for 30 min to allow for full conversion to boric ester intermediate **2h**.

Next, a suspension of IPrAuCl (16 mg, 0.025 mmol, 5.0 mol %) in toluene (0.5 mL) was added to the reaction mixture at 25 °C, using additional toluene as a rinse to aid in full transfer (1 × 0.5 mL portion). The reaction mixture was then sealed with a ground glass stopper and a PTFE sealing ring and placed in a preheated 90 °C copper shot heating bath. The final concentration of the reaction mixture was 0.08 M in **1h**.

After 40 h, analysis by TLC (20% EtOAc/hexanes) indicated full consumption of boric ester intermediate **2h**. The reaction mixture was cooled to 25 °C, and a solution of PPh<sub>3</sub> (13 mg, 0.050 mmol, 10 mol %) in toluene (0.5 mL) was added. The resulting suspension was stirred for 26 h at 25 °C in order to quench IPrAuTFA before proceeding.

The quenched reaction mixture was removed from the glovebox and filtered through a fiberglass filter to remove the suspended solids. The filter was then rinsed with chloroform (3 × 3 mL), and the combined filtrates were concentrated in vacuo to a pale yellow powder, which was suspended in acetone (4.5 mL) and added to a stirring solution of KHF<sub>2</sub> (160 mg, 2.0 mmol 4.0 equiv) in water (1.5 mL). The resulting mixture was stirred at 25 °C for 30 min, and then concentrated in vacuo to remove the solvents. To this residue was added 2 mL Et<sub>2</sub>O and subsequently concentrated at c.a. 10 mTorr for 30 min in order to remove residual acetone. The resulting pale yellow solid residue was washed with Et<sub>2</sub>O (4 × 2 mL) and extracted with acetone (4 × 2 mL). The combined acetone extracts were concentrated in vacuo, and the resulting residue was subjected to an additional washing/extraction cycle to yield **4h** as a light green powder (79 mg, 42% yield) with trace residual acetone after removing volatiles at 25 °C and c.a. 10 mTorr for 18 h.

<sup>1</sup>H NMR (*d*<sub>6</sub>-DMSO, 600 MHz): δ 8.30 (s, 1H), 7.75 (dd, *J* = 9.4 Hz, 1.7 Hz, 1H), 7.44 (d, *J* = 8.5 Hz, 1H), 3.85, (s, 3H), 3.67 (br s, 2H), 3.54 (app t, *J* = 4.1 Hz, 4H), 2.44 (br s, 4H).

<sup>13</sup>C NMR (*d*<sub>6</sub>- DMSO, 125 MHz): δ 167.0, 157.3, 155.5 (br), 134.1, 125.2, 123.9, 122.7, 109.8, 66.2, 54.2, 53.0, 51.8. [Note: As with many organotrifluoroborates, the *ipso* carbon was not detected, presumably due to broadening through coupling to the <sup>11</sup>B nucleus.]

<sup>11</sup>B NMR (*d*<sub>6</sub>- DMSO, 193 MHz): δ 2.8 (br s).

<sup>19</sup>F NMR (*d*<sub>6</sub>-DMSO, 376 MHz): δ -133.1 (br s).

HRMS (ESI-): Calculated for C<sub>15</sub>H<sub>16</sub>BF<sub>3</sub>NO<sub>4</sub> ([M-K]<sup>-</sup>), 342.1127; found 342.1125.

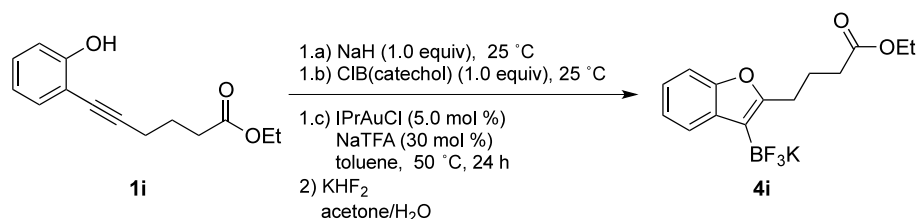

**Benzofuran trifluoroborate 4i.** A solution of phenol **1i** (101 mg, 0.440 mmol, 1.00 equiv) in 0.75 mL toluene was added to a flame-dried 10-mL Schlenk tube. To this stirring solution was added dropwise at 25 °C a suspension of NaH (92 wt % purity, 11 mg, 0.44 mmol, 1.0 equiv) in 0.5 mL toluene over 2 min. A suspension of NaTFA (18 mg, 0.13 mmol, 30. mol %) in 0.5 mL toluene was added next, and the resulting suspension was stirred for 15 min to affect full deprotonation.

To the resulting stirring sodium phenoxide suspension was added at 25 °C a solution of *B*-chlorocatecholborane (67 mg, 0.44 mmol, 1.0 equiv) in toluene (0.75 mL), using additional toluene as a rinse to ensure full transfer (2 × 0.5 mL portions). The resulting suspension was stirred vigorously for 30 min to allow for full conversion to boric ester intermediate **2i**.

Next, a suspension of IPrAuCl (14 mg, 0.022 mmol, 5.0 mol %) in toluene (0.5 mL) was added to the reaction mixture at 25 °C, using additional toluene as a rinse to aid in full transfer (1 × 0.5 mL portion). The reaction mixture was then sealed with a ground glass stopper and a PTFE sealing ring and placed in a preheated 50 °C copper shot heating bath. The final concentration of the reaction mixture was 0.1 M in **1i**.

After 24 h, analysis by TLC (20% EtOAc/hexanes) indicated full consumption of boric ester intermediate **2i**. The reaction mixture was cooled to 25 °C, and a solution of PPh<sub>3</sub> (8.0 mg, 0.030 mmol, 10. mol %) in toluene (0.5 mL) was added. The resulting suspension stirred for 22 h at 25 °C in order to quench IPrAuTFA before proceeding.

The quenched reaction mixture was removed from the glovebox and filtered through a fiberglass filter to remove the suspended solids. The filter was then rinsed with toluene (3 × 3 mL), and the combined filtrates were concentrated in vacuo to a pale yellow powder, which was suspended in acetone (4.5 mL) and added to a stirring solution of KHF<sub>2</sub> (136 mg, 1.70 mmol, 3.50 equiv) in water (1.5 mL). The resulting mixture was stirred at 25 °C for 30 min, and then concentrated in vacuo to remove the solvents. To this residue was added 2 mL Et<sub>2</sub>O and subsequently concentrated at c.a. 10 mTorr for 30 min in order to remove residual acetone. The resulting pale yellow solid residue was washed with Et<sub>2</sub>O (4 × 2 mL) and extracted with acetone (4 × 2 mL). The combined acetone extracts were concentrated in vacuo, and the resulting residue was subjected to an additional washing/extraction cycle to yield **4i** as a white powder (102 mg, 69% yield) after removing volatiles at 25 °C and c.a. 10 mTorr for 18 h.

<sup>1</sup>H NMR (*d*<sub>6</sub>- DMSO, 600 MHz): δ 7.55 (t, *J* = 6.7 Hz, 1H), 7.27 (dd, *J* = 6.7, 1.8 Hz, 1H), 7.05–6.93 (m, 2H), 4.03 (q, *J* = 7.0 Hz, 2H), 2.77 (t, *J* = 7.3 Hz, 2H), 2.28 (t, *J* = 7.7 Hz, 2H), 1.85 (quin, *J* = 7.5 Hz, 2H), 1.16 (t, *J* = 7.1 Hz, 3H).

<sup>13</sup>C NMR (*d*<sub>6</sub>- DMSO, 125 MHz): δ 172.9, 157.3, 154.0, 134.6, 122.5, 121.3, 120.7, 109.2, 59.6, 33.1, 27.0, 24.0, 14.1.

<sup>11</sup>B NMR (*d*<sub>6</sub>- DMSO, 193 MHz): δ 2.9 (br s).

<sup>19</sup>F NMR (*d*<sub>6</sub>- DMSO, 377 MHz) δ –133.6 (m).

HRMS (ESI-): Calculated for C<sub>14</sub>H<sub>15</sub>BF<sub>3</sub>O<sub>3</sub> ([M-K]<sup>+</sup>), 299.1069; found 299.1063.

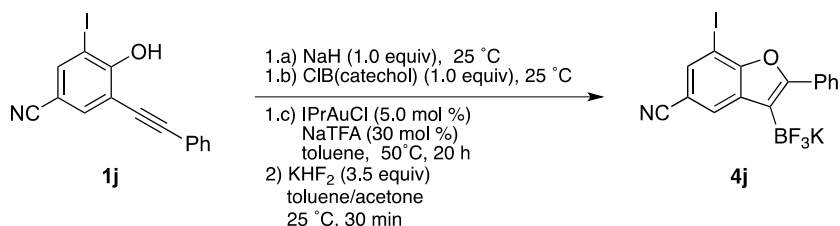

**Benzofuran trifluoroborate 4j.** A solution of phenol **1j** (41.4 mg, 0.119 mmol, 1.00 equiv) in 150 μL toluene was added to a flame-dried 10-mL Schlenk tube. To this stirring solution was added dropwise at 25 °C a suspension of NaH (92 wt % purity, 3.1 mg, 0.12 mmol, 1.0 equiv) in 150 μL toluene. A suspension of NaTFA (4.9. mg, 0.036 mmol, 30 mol %) in 150 μL toluene was added next. The resulting suspension was stirred for 15 min to affect full deprotonation.

To the resulting stirring sodium phenoxide suspension was added at 25 °C a solution of *B*-chlorocatecholborane (18.3 mg, 0.119 mmol, 1.00 equiv) in toluene (150 μL), using additional toluene as a rinse to ensure full transfer (1 × 150 μL portions). The resulting suspension was stirred vigorously for 30 min to allow for full conversion to boric ester intermediate **2j**.

Next, a suspension of IPrAuCl (16 mg, 0.025 mmol, 5.0 mol %) in toluene (150  $\mu$ L) was added to the reaction mixture at 25  $^{\circ}$ C, using additional toluene as a rinse to aid in full transfer ( $1 \times 150$   $\mu$ L portion). The reaction mixture was then sealed with a ground glass stopper and a PTFE sealing ring and placed in a preheated 90  $^{\circ}$ C copper shot heating bath. The final concentration of the reaction mixture was 0.1 M in **1j**.

After 20 h, analysis by TLC (10% EtOAc/hexanes) indicated full consumption of boric ester intermediate **2j**. The reaction mixture was cooled to 25  $^{\circ}$ C, and a solution of PPh<sub>3</sub> (3.1 mg, 0.012 mmol, 10 mol %) in toluene (0.5 mL) was added. The resulting suspension was stirred for 18 h at 25  $^{\circ}$ C in order to quench IPrAuTFA before proceeding.

The quenched reaction mixture was removed from the glovebox and filtered through a fiberglass filter to remove the suspended solids. The filter was then rinsed with chloroform ( $3 \times 3$  mL), and the combined filtrates were concentrated in vacuo to a pale yellow powder, which was suspended in acetone (1.0 mL) and added to a stirring solution of KHF<sub>2</sub> (37 mg, 0.48 mmol, 4.0 equiv) in water (300  $\mu$ L). The resulting mixture was stirred at 25  $^{\circ}$ C for 30 min, and then concentrated in vacuo to remove the solvents. Residual water was removed azeotropically by adding 2 mL acetone and concentrating in vacuo again. To this residue was added 2 mL Et<sub>2</sub>O and subsequently concentrated at c.a. 10 mTorr for 30 min in order to remove residual acetone. The resulting pale yellow solid residue was washed with Et<sub>2</sub>O ( $4 \times 2$  mL) and extracted with acetone ( $4 \times 2$  mL). The combined acetone extracts were concentrated in vacuo, and the resulting residue was subjected to an additional washing/extraction cycle to yield **4j** as a light green powder (12 mg, 23% yield) with trace residual acetone after removing volatiles at 25  $^{\circ}$ C and c.a. 10 mTorr for 18 h.

<sup>1</sup>H NMR (*d*<sub>6</sub>-DMSO, 600 MHz):  $\delta$  8.07 (d, *J* = 1.4 Hz, 1H), 7.87 (d, *J* = 1.5 Hz, 1H), 7.59–7.57 (m, 1H), 2.56–2.53 (m, 2H), 2.23–2.20 (m, 2H), 1.69–1.65 (m, 2H), 1.62–1.58 (m, 2H).

<sup>13</sup>C NMR (*d*<sub>6</sub>-DMSO, 125 MHz):  $\delta$ . [Note: As with many organotrifluoroborates, the *ipso* carbon was not detected, presumably due to broadening through coupling to the <sup>11</sup>B nucleus. A second quaternary carbon was also not detected.]

<sup>11</sup>B NMR (*d*<sub>6</sub>-DMSO, 193 MHz):  $\delta$  2.8 (br s).

<sup>19</sup>F NMR (*d*<sub>6</sub>-DMSO, 376 MHz):  $\delta$  -130.7 (br s).

HRMS (ESI<sup>-</sup>): Calculated for C<sub>15</sub>H<sub>11</sub>BF<sub>3</sub>INO ([M-K]<sup>-</sup>), 415.9933; found 415.9916.

#### D. General procedure NMR conversions using ERETIC

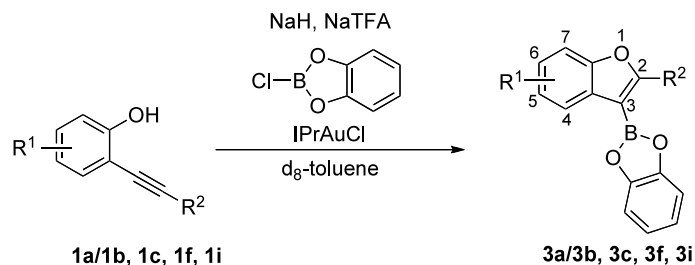

A 4-mL vial was charged with a 2-substituted alkynylphenol (0.05 mmol, 1 equiv), and 0.5 mL *d*<sub>8</sub>-toluene. A second 4-mL vial was charged with NaH (1.3 mg, 0.050 mmol, 1.0 equiv) and

NaTFA (2.7 mg, 0.020 mmol, 0.30 equiv). The solution containing the phenol was then added dropwise to the vial containing NaH and NaTFA, and swirled intermittently for 15 min. This cloudy mixture was then added dropwise to another 4-mL vial containing *B*-chlorocatecholborane (7.7 mg, 0.050 mmol, 1.0 equiv). This mixture was then swirled intermittently for 30 min before transferring into a new vial containing IPrAuCl (1.6 mg, 0.0030 mmol, 0.050 equiv). This mixture was then transferred into a J. Young NMR tube, which was sealed and removed from the glove box. This tube was then heated to 50 °C for 18-24 h. An <sup>1</sup>H NMR was taken (600 MHz, *d*<sub>8</sub>-toluene), and the signals correlating to the corresponding cyclized benzofuran boronic ester were compared to an external standard of mesitylene (419 mmol/L in *d*<sub>8</sub>-toluene) using the ERETIC method, ensuring the acquisition parameters were identical. This general procedure was used for R<sup>1</sup>= H, R<sup>2</sup>=Ph (**3a**, **3b**, 95%); R<sup>1</sup>= 6-Br, R<sup>2</sup>= Bu (**3c**, 88%); R<sup>1</sup>= 6-CCH, R<sup>2</sup>=H (**3f**, 42%), R<sup>1</sup>= H, R<sup>2</sup>= -(CH<sub>2</sub>)<sub>3</sub>CO<sub>2</sub>Et (**3i**, 71%).

### E. Gram-scale preparation of **4i**

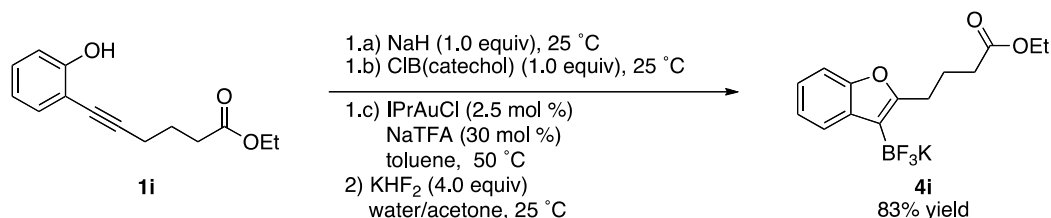

The gram-scale alkoxyboration reaction was conducted in an N<sub>2</sub>-filled glovebox. A flame-dried 100-mL Schlenk tube with a stirbar was charged with NaH (92 wt % purity, 123 mg, 5.13 mmol, 1.00 equiv) and NaTFA (210 mg, 1.5 mmol, 30. mol %). Anhydrous toluene (12 mL) was added. To the resulting rapidly stirring suspension was added a solution of phenol **1i** (1.30 g, 5.13 mmol, 1.00 equiv) in toluene (2 mL) at 25 °C dropwise over 5 min. Additional toluene (3 × 2 mL) was used as a rinse to aid in complete transfer. The reaction mixture was stirred at 25 °C for 30 min to affect full deprotonation.

To the resulting pale yellow suspension was added a solution of *B*-chlorocatecholborane (790. mg, 5.13 mmol, 1.00 equiv) in toluene (5 mL) dropwise over 5 min. [Note: a slight exotherm occurs.] Additional toluene (3 × 5 mL) was used as a rinse to aid in complete transfer. The reaction mixture was stirred at 25 °C for 30 min to affect full formation of boric ester intermediate **2i**.

A suspension of IPrAuCl (80. mg, 0.13 mmol, 2.5 mol %) in toluene (2.5 mL) was added next, using additional toluene (3 × 2.5 mL) as a rinse to ensure full transfer. The reaction vessel was then sealed with a ground glass joint and a PTFE sealing ring and placed in a preheated 60 °C copper shot heating bath. The final concentration of the reaction mixture was 0.1 M in **1i**.

After 22 h, analysis by TLC (10% EtOAc/hexanes) indicated complete consumption of boric ester intermediate **2i**. The reaction mixture was cooled to 25 °C, and then a solution of PPh<sub>3</sub> (67 mg, 0.26 mmol, 5.0 mol %) in 2.5 mL toluene was added to the reaction mixture. The resulting suspension was stirred for 23 h at 25 °C in order to quench IPrAuTFA before proceeding.

The suspension containing boronic ester **3i** was removed from the glovebox and concentrated in vacuo. The resulting solid residue was extracted with toluene (3 × 15 mL), and the combined

extracts were filtered through a fiberglass filter to ensure removal of suspended solids. The filtrate was concentrated in vacuo, and the resulting residue was dissolved in acetone (45 mL) and added to a vigorously stirring solution of  $\text{KHF}_2$  (1.6 g, 21 mmol, 4.0 equiv) in 15 mL  $\text{H}_2\text{O}$ . The reaction mixture was stirred open to air for 30 min at 25 °C before being concentrated in vacuo to remove the solvents. Residual water was removed azeotropically by adding 2 mL acetone and concentrating in vacuo again. The resulting solid residue was washed with  $\text{Et}_2\text{O}$  (15  $\times$  30 mL) and extracted with acetone (3  $\times$  15 mL). The combined acetone extracts were concentrated in vacuo to yield **4i** as a white powder (1.43 g, 83% yield) after removing volatiles at 25 °C and c.a. 10 mTorr for 18 h. Spectral data were identical to those previously obtained for this compound (see page S18).

#### F. Downstream functionalization reactions to produce **6**, **8**, and **10**

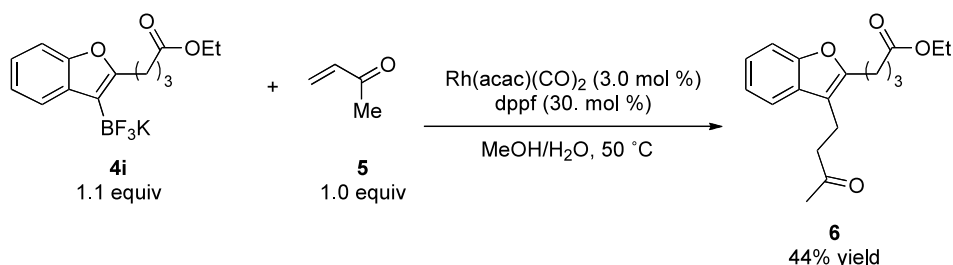

**Ethyl 4-(3-(3-oxobutyl)benzofuran-2-yl)butanoate (**6**).** The Rh-catalyzed conjugate addition of **4i** to methyl vinyl ketone was conducted using a procedure adapted from Batey.<sup>14</sup> A dram vial was charged with **4i** (85 mg, 0.25 mmol, 1.1 equiv) and a stirbar. The vial was pumped into an  $\text{N}_2$ -filled glovebox, where  $\text{Rh}(\text{acac})(\text{CO})_2$  (1.9 mg, 7.1  $\mu\text{mol}$ , 3.0 mol %) and  $\text{dppf}$  (40. mg, 72  $\mu\text{mol}$ , 30. mol %) were added. The vial was sealed with a septum cap, removed from the glovebox, and placed under dynamic  $\text{N}_2$  atmosphere. Methanol (2.2 mL) and water (400  $\mu\text{L}$ ) were added, and the resulting mixture was stirred at 25 °C for 15 min to dissolve the solids. Methyl vinyl ketone (19  $\mu\text{L}$ , 0.23 mmol, 1.0 equiv) was added, and the reaction mixture was heated at 50 °C for 30 h. To the resulting heterogeneous brown mixture was added 10-mL DCM, and the resulting biphasic mixture was separated. The aqueous layer was back extracted with DCM (3  $\times$  1 mL), and the combined organic layers were dried over  $\text{Na}_2\text{SO}_4$ , filtered, and concentrated in vacuo to a brown solid residue. Purification by silica gel chromatography using an elution gradient from 100% hexanes to 15%  $\text{EtOAc}$ /hexanes and removal of volatiles at 25 °C and c.a. 10 mTorr for 18 h afforded **6** as a clear, colorless oil (33 mg, 44% yield).

TLC (15%  $\text{EtOAc}$ /hexanes):  $R_f$  = 0.29.

$^1\text{H}$  NMR ( $\text{CDCl}_3$ , 500 MHz):  $\delta$  7.43 (d,  $J$  = 7.2 Hz, 1H), 7.38 (d,  $J$  = 8.4 Hz, 1H), 7.23–7.18 (m, 2H), 4.11 (q,  $J$  = 7.0 Hz, 2H), 2.88 (t,  $J$  = 7.3 Hz, 2H), 2.82 (t,  $J$  = 7.3 Hz, 2H), 2.77 (t,  $J$  = 7.3 Hz, 2H), 2.36 (t,  $J$  = 7.4 Hz, 2H), 2.13 (s, 3H), 2.05 (quin,  $J$  = 7.5 Hz, 2H), 1.25 (t,  $J$  = 7.1 Hz, 3H).

$^{13}\text{C}$  NMR ( $\text{CDCl}_3$ , 125 MHz):  $\delta$  207.9, 173.3, 154.2, 153.8, 129.1, 123.5, 122.3, 118.9, 113.8, 111.0, 60.5, 43.4, 33.6, 30.3, 25.6, 23.6, 17.6, 14.4.

HRMS (ESI<sup>+</sup>): Calculated for  $\text{C}_{18}\text{H}_{22}\text{O}_4\text{Na}$  ( $[\text{M}+\text{Na}]^+$ ), 325.1416; found 325.1420.



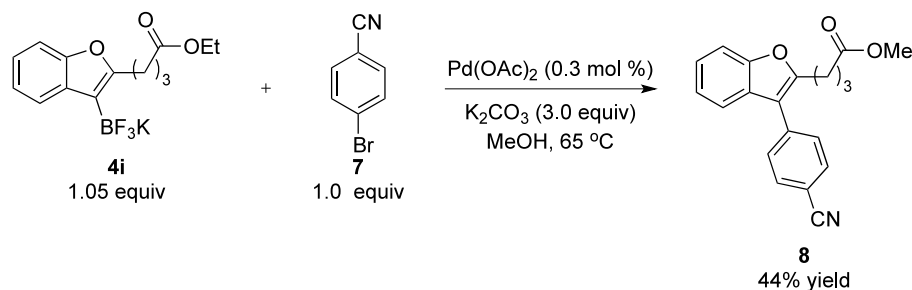

**Methyl 4-(3-(4-cyanophenyl)benzofuran-2-yl)butanoate (8).** A 20-mL vial was charged with **4i** (99 mg, 0.29 mmol, 1.1 equiv),  $\text{K}_2\text{CO}_3$  (116 mg, 0.837 mmol, 3.00 equiv), and  $\text{Pd}(\text{OAc})_2$  (0.2 mg, 0.001 mmol, 0.3 mol %). The vial was then evacuated and refilled with  $\text{N}_2$  three times. To this vial was then added 0.4 mL of MeOH that had been sparged for 10 min with  $\text{N}_2$ . In a separate flask was added 4-benzonitrile (51 mg, 0.28 mmol, 1.0 equiv), which was then evacuated and refilled with  $\text{N}_2$  three times before adding 0.4 mL MeOH that had been sparged 10 min with  $\text{N}_2$ . This solution was then syringed into the stirring reaction vial over 1 min. The vial was then equipped with an argon balloon and heated to 65 °C. The mixture stirred for 18 h before TLC (10% EtOAc/hexanes) showed the complete consumption of starting material. The reaction mixture was diluted with 20 mL toluene, and then the organic layer was washed with  $\text{H}_2\text{O}$  (1  $\times$  5 mL), brine (1  $\times$  5 mL), filtered, and concentrated in vacuo. The resulting oily residue was purified by column chromatography using an elution gradient from 100% hexanes to 15% EtOAc/hexanes. Product-containing fractions were combined and concentrated in vacuo, and volatiles were removed at c.a. 10 mTorr for 18 h to afford **8** as a white solid. (41 mg, 44% yield).

TLC (10% EtOAc/hexanes)  $R_f$  = 0.20, visualized by UV absorbance.

$^1\text{H}$  NMR ( $\text{CDCl}_3$ , 600 MHz):  $\delta$  7.78 (d,  $J$  = 8.2 Hz, 2H), 7.61 (d,  $J$  = 8.2 Hz, 2H), 7.50 (dd,  $J$  = 16.3, 7.9 Hz, 2H), 7.32 (t,  $J$  = 7.6 Hz, 1H), 7.26 (t,  $J$  = 7.2 Hz, 1H), 3.61 (s, 3H), 2.93 (t,  $J$  = 7.5 Hz, 2H), 2.38 (t,  $J$  = 7.3 Hz, 2H), 2.13 (quin,  $J$  = 7.3 Hz, 2H).

$^{13}\text{C}$  NMR ( $\text{CDCl}_3$ , 125 MHz):  $\delta$  173.4, 155.0, 154.3, 137.8, 132.8, 129.7, 127.8, 124.5, 123.3, 119.3, 119.0, 116.4, 111.4, 110.9, 51.8, 33.2, 26.2, 23.5.

HRMS (ESI $^+$ ): Calculated for  $\text{C}_{20}\text{H}_{17}\text{NO}_3\text{Na}$  ( $[\text{M}+\text{Na}]^+$ ), 342.1106; found 342.1094.

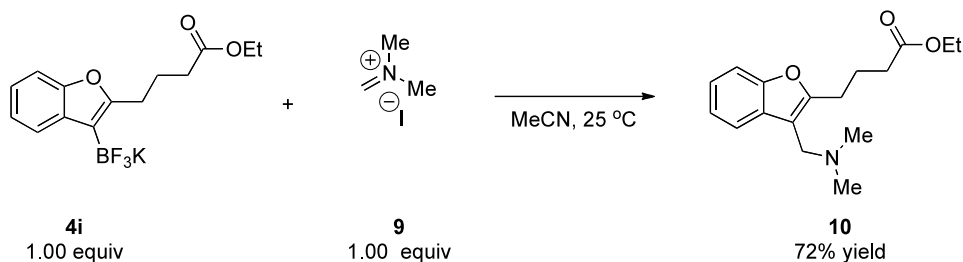

**Ethyl 4-(3-((dimethylamino)methyl)benzofuran-2-yl)butanoate (10).** A 10-mL Schlenk tube was charged with Eschenmoser's salt (**9**, 74.0 mg, 0.300 mmol, 1.00 equiv) and 1.0 mL anhydrous MeCN. To the resulting suspension was added a solution of organotrifluoroborate **4i** (101 mg, 0.300 mmol, 1.00 equiv) in 1.3 mL dry MeCN. The reaction mixture was stirred vigorously for 30 min at 25 °C, at which time a saturated aqueous solution of  $\text{NaHCO}_3$  (1 mL) was added to quench the reaction. The resulting biphasic mixture was extracted with EtOAc (3  $\times$

3 mL), and the combined organic layers were washed with brine (3 × 3 mL), dried over Na<sub>2</sub>SO<sub>4</sub>, and concentrated in vacuo to an oily residue. Purification by column chromatography using an elution gradient from 1.5% Et<sub>3</sub>N in hexanes to 40% EtOAc and 0.9% Et<sub>3</sub>N in hexanes afforded **10** as a clear, pale yellow oil (63 mg, 72% yield)

TLC (30% EtOAc + 1% Et<sub>3</sub>N/hexanes) R<sub>f</sub> = 0.27, visualized by UV absorbance.

<sup>1</sup>H NMR (CDCl<sub>3</sub>, 600 MHz): δ 7.63–7.61 (m, 1H), 7.41–7.30 (m, 1H), 7.24–7.19 (m, 2H), 4.13 (q, *J* = 7.1 Hz, 2H), 3.47 (s, 2H), 2.86 (t, *J* = 7.3 Hz, 2H), 2.38 (t, *J* = 7.4 Hz, 2H), 2.26 (s, 6H), 2.09 (app quin, *J* = 7.3 Hz, 2H), 1.26 (t, *J* = 7.1 Hz, 3H).

<sup>13</sup>C NMR (CDCl<sub>3</sub>, 125 MHz): δ 173.3, 155.4, 154.1, 129.7, 123.5, 122.5, 119.9, 112.6, 110.7, 60.5, 53.2, 45.6, 33.6, 25.8, 23.5, 14.4.

HRMS (ESI<sup>+</sup>): Calculated for C<sub>17</sub>H<sub>23</sub>NO<sub>3</sub>Na ([M+Na]<sup>+</sup>), 312.1576; found 312.1570.

## G. Synthesis of dihydrofuran product **12**

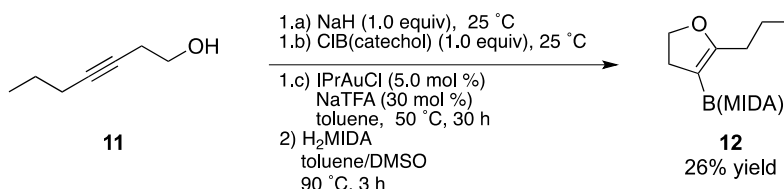

Prior to use, **11** was dried by distilling over anhydrous K<sub>2</sub>CO<sub>3</sub> (15 Torr, 80 °C) and was stored over activated 3Å molecular sieves. The alkoxyboration reaction was set up and conducted in an N<sub>2</sub>-filled glovebox. A flame-dried 100 mL Schlenk tube with a stirbar was charged with NaH (92 wt % purity, 26.0 mg, 1.00 mmol, 1.00 equiv) and NaTFA (41 mg, 0.30 mmol, 30 mol %). Anhydrous toluene (4 mL) was added. Compound **9** (103 μL, 1.00 mmol, 1.00 equiv) was added dropwise over 1 min, and then the reaction mixture was stirred at 25 °C for 40 min to affect full deprotonation.

To the resulting suspension was added a solution of *B*-chlorocatecholborane (154 mg, 1.00 mmol, 1.00 equiv) in toluene (2 mL) dropwise over 5 min. Additional toluene (2 × 1 mL) was used as a rinse to aid in complete transfer. The reaction mixture was stirred at 25 °C for 30 min to affect full formation of the boric ester intermediate.

A suspension of IPrAuCl (31 mg, 0.050 mmol, 5.0 mol %) in toluene (1 mL) was added next, using additional toluene (2 × 0.5 mL) as a rinse to ensure full transfer. The reaction vessel was then sealed with a ground glass joint and a PTFE sealing ring and placed in a preheated 50 °C copper shot heating bath. The final concentration of the reaction mixture was 0.1 M in **11**.

Analysis by TLC (20% EtOAc/hexanes) at 23 h and 30 h indicated stalled, nearly complete consumption of the boric ester intermediate. The reaction mixture was cooled to 25 °C, and then a solution of PPh<sub>3</sub> (26 mg, 0.10 mmol, 10 mol %) in 1 mL toluene. The resulting suspension was stirred for 16 h at 25 °C in order to quench IPrAuTFA before proceeding.

To the quenched reaction mixture were added H<sub>2</sub>MIDA (160 mg, 1.1 mmol, 1.1 equiv) and dry DMSO (4 mL), and the resulting suspension was stirred at 90 °C for 3 h. The reaction mixture was then cooled to 25 °C and removed from the glovebox. Toluene was removed in vacuo at 25 °C and c.a. 10 Torr, then DMSO was removed by Kugelrohr distillation at c.a. 10 mTorr. The

resulting semisolid residue was adsorbed onto Celite from a MeCN suspension and purified twice by successive silica gel chromatography using an elution gradient from 100% Et<sub>2</sub>O to 100% MeCN. Removal of volatiles at 25 °C and c.a. 10 mTorr for 18 h afforded MIDA boronate **12** as a white powder (83 mg, 26% yield).

<sup>1</sup>H NMR (CD<sub>3</sub>CN, 600 MHz): δ 3.94 (d, *J* = 17.2 Hz, 2H), 3.84 (d, *J* = 17.2 Hz, 2H), 3.68 (t, *J* = 6.8 Hz, 2H), 2.86 (s, 3H), 2.38 (tt, *J* = 6.9, 2.3 Hz, 2H), 2.11 (tt, *J* = 6.9, 2.3 Hz, 2H), 1.46 (sextet, *J* = 7.3 Hz, 2H), 0.95 (t, *J* = 7.3 Hz, 3H).

<sup>13</sup>C NMR (CD<sub>3</sub>CN, 125 MHz): δ 168.3, 82.0, 78.3, 63.3, 63.1, 46.1, 23.2, 22.7, 21.1, 13.7.

<sup>11</sup>B NMR (CD<sub>3</sub>CN, 193 MHz): δ 8.8 (br s).

HRMS (ESI<sup>+</sup>): Calculated for C<sub>12</sub>H<sub>18</sub>BNO<sub>5</sub>Na ([M+Na]<sup>+</sup>), 290.1178; found 290.1180.

### III. References

1. Liu, Y.; Ma S. *Org. Lett.* **2012**, *14*, 720–723.
2. Fischer, J.; Savage, G. P.; Coster, M. J. *Org. Lett.* **2011**, *13*, 3376–3370.
3. Cowart, M.; Faghih, R.; Curtis, M. P.; Gfesser, G. A.; Bennani, Y. L.; Black, L. A.; Pan, L.; Marsh, K. C.; Sullivan, J. P.; Esbenshade, T. A.; Fox, G. B.; Hancock, A. A. *J. Med. Chem.* **2005**, *48*, 38–55.
4. Larrosa, I.; Da Silva, M. I.; Gómez, P. M.; Hannen, P.; Ko, E.; Lenger, S. R.; Linke, S. R.; White, A. J. P.; Wilton, D.; Barrett, A. G. M. *J. Am. Chem. Soc.* **2006**, *128*, 14042–14043.
5. Tsang, K. Y.; Brimble, M. A. *Tetrahedron* **2007**, *63*, 6015–6034.
6. Kawasaki, T.; Yamamoto, Y. *J. Org. Chem.* **2002**, *67*, 5138–5141.
7. Ried, W.; Schmidt, H.-J. *Chem. Ber.* **1957**, *90*, 2553–2561.
8. Achard, T.; Lepronier, A.; Gimbert, Y.; Clavier, H.; Giodano, L.; Tenaglia, A.; Buono, G. *Angew. Chem. Int. Ed.* **2011**, *50*, 3552–3556.
9. Ozaki, S.; Matsushita, H.; Ohmori, H. *J. Chem. Soc., Perkin Trans. I* **1993**, 2339–2344.
10. Torregrosa, J.-L.; Baboulene, M. V.; Speziale, M.; Lattes, A. *J. Orgmet. Chem.* **1983**, *244*, 311–317.
11. Rozhkov, R. V.; Larock, R. C. *J. Org. Chem.* **2010**, *75*, 4131–4134.
12. Duclos, S.; Stoeckli-Evans, H.; Ward, T. R. *Helv. Chim. Acta* **2001**, *84*, 3148–3161.
13. Shi, Y.; Roth, K. E.; Ramgren, S. D.; Blum, S. A. *J. Am. Chem. Soc.* **2009**, *131*, 18022–18023.
14. Batey, R. A.; Thadani, A. N.; Smil, D. V. *Org. Lett.* **1999**, *1*, 1683–1686.

## IV. NMR Spectra

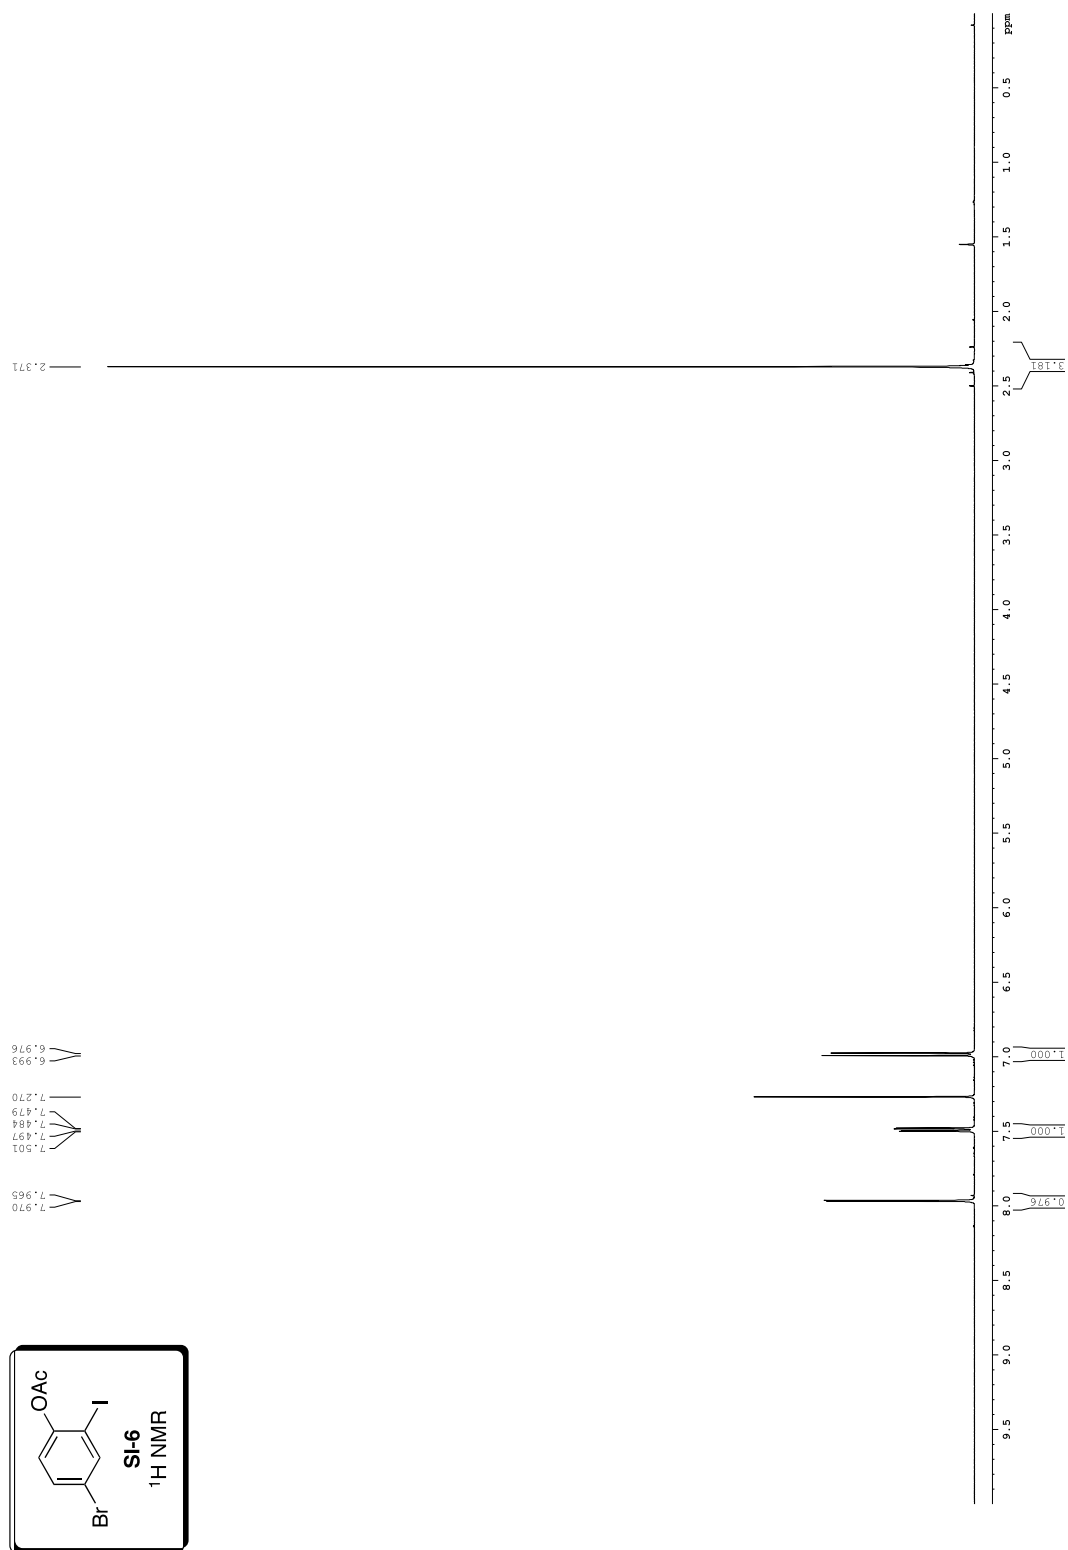

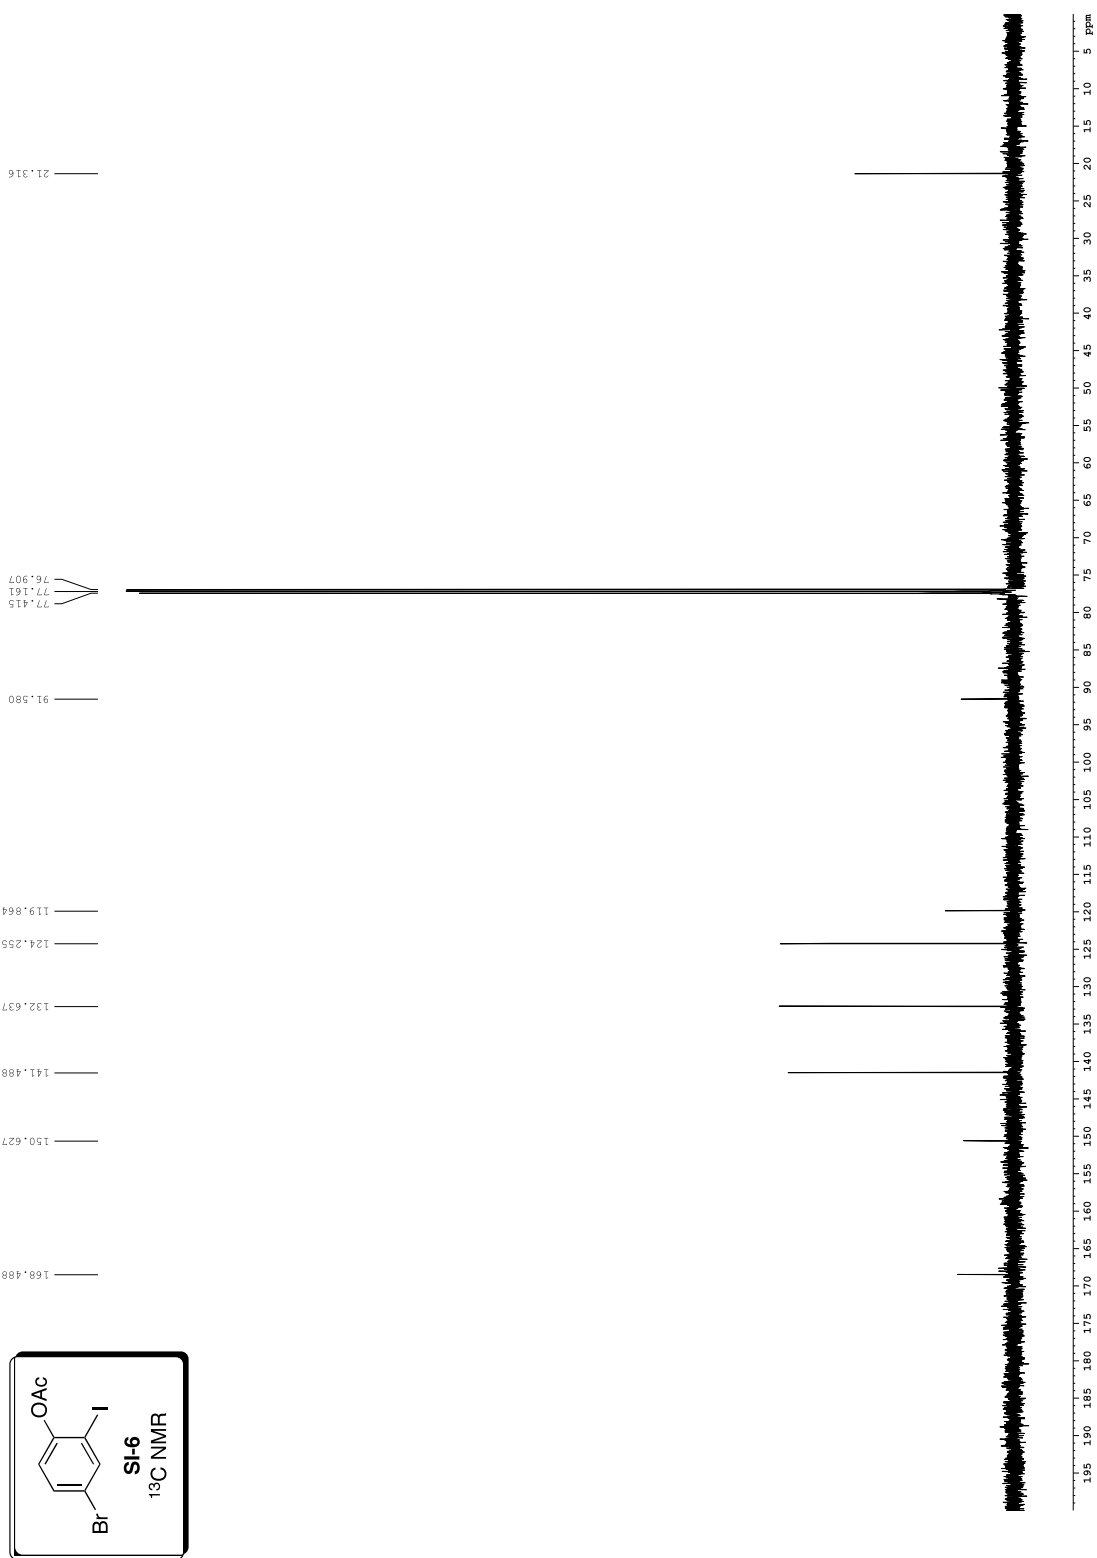

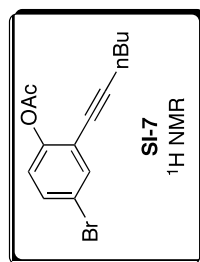

7.578  
7.574  
7.408  
7.403  
7.391  
7.386  
7.271  
7.270  
6.949  
6.931

2.443  
2.429  
2.415  
2.324  
2.323

1.595  
1.581  
1.566  
1.502  
1.486  
1.471

0.970  
0.955  
0.941

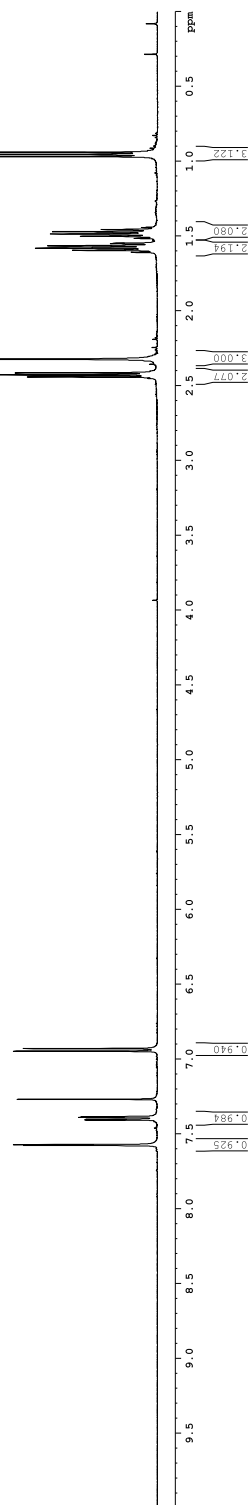

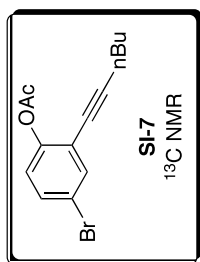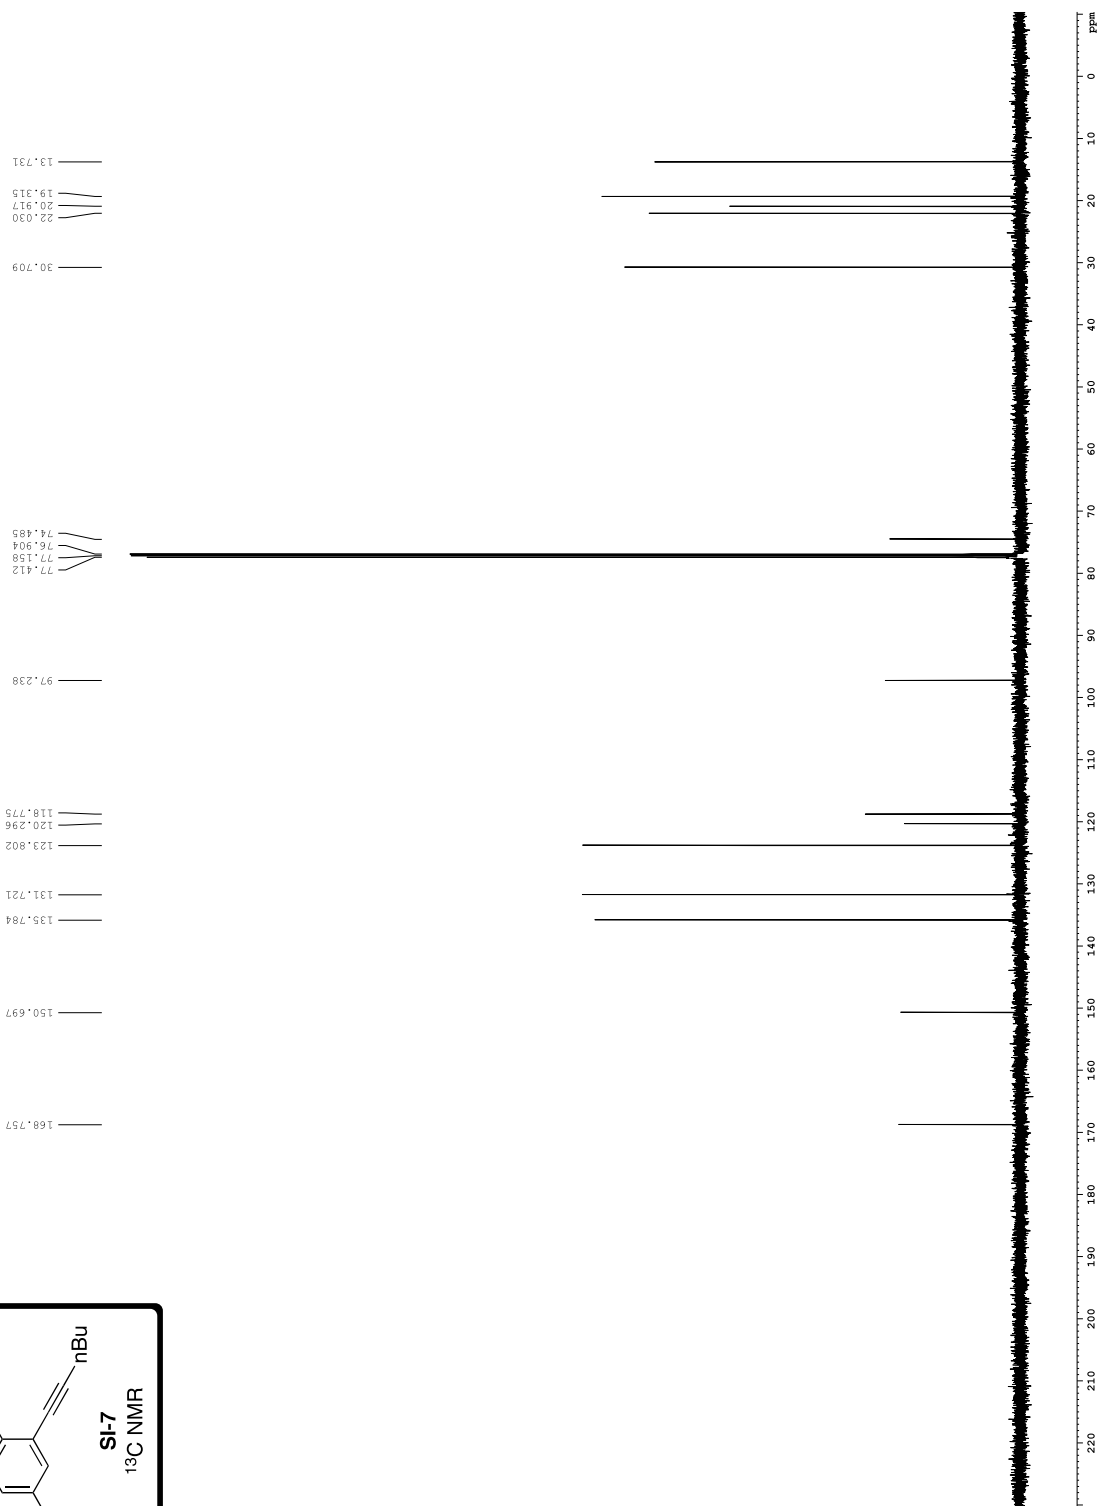

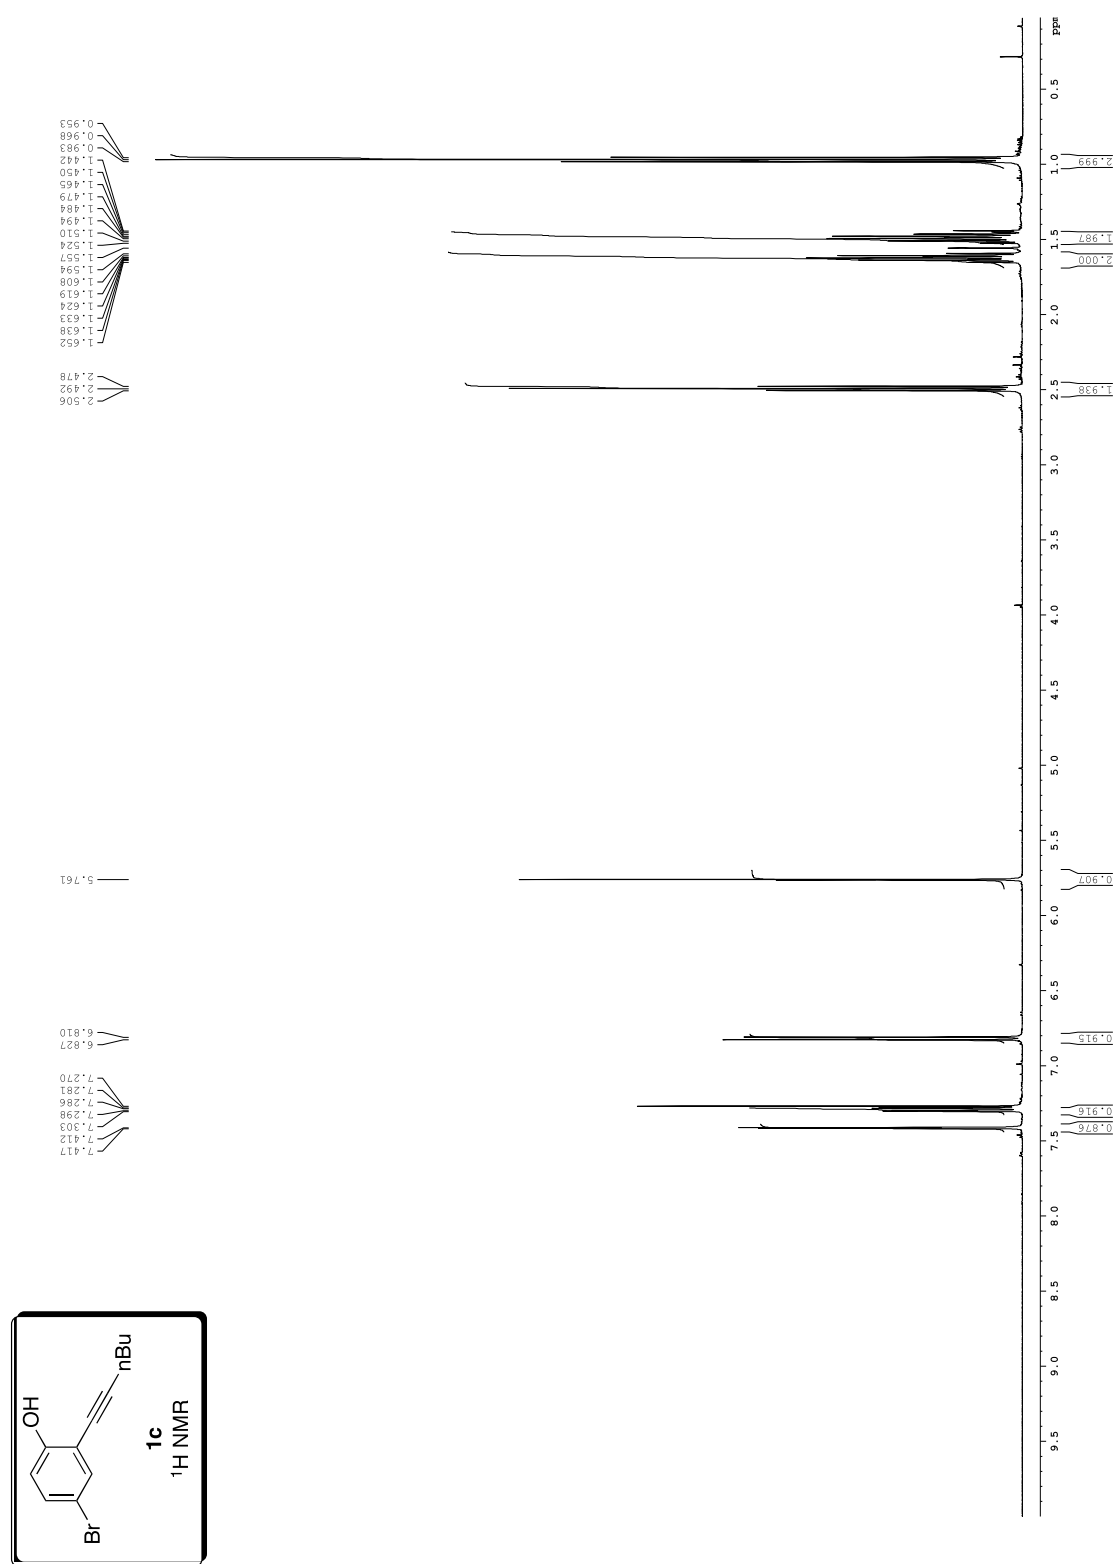



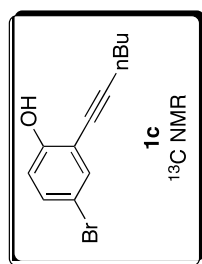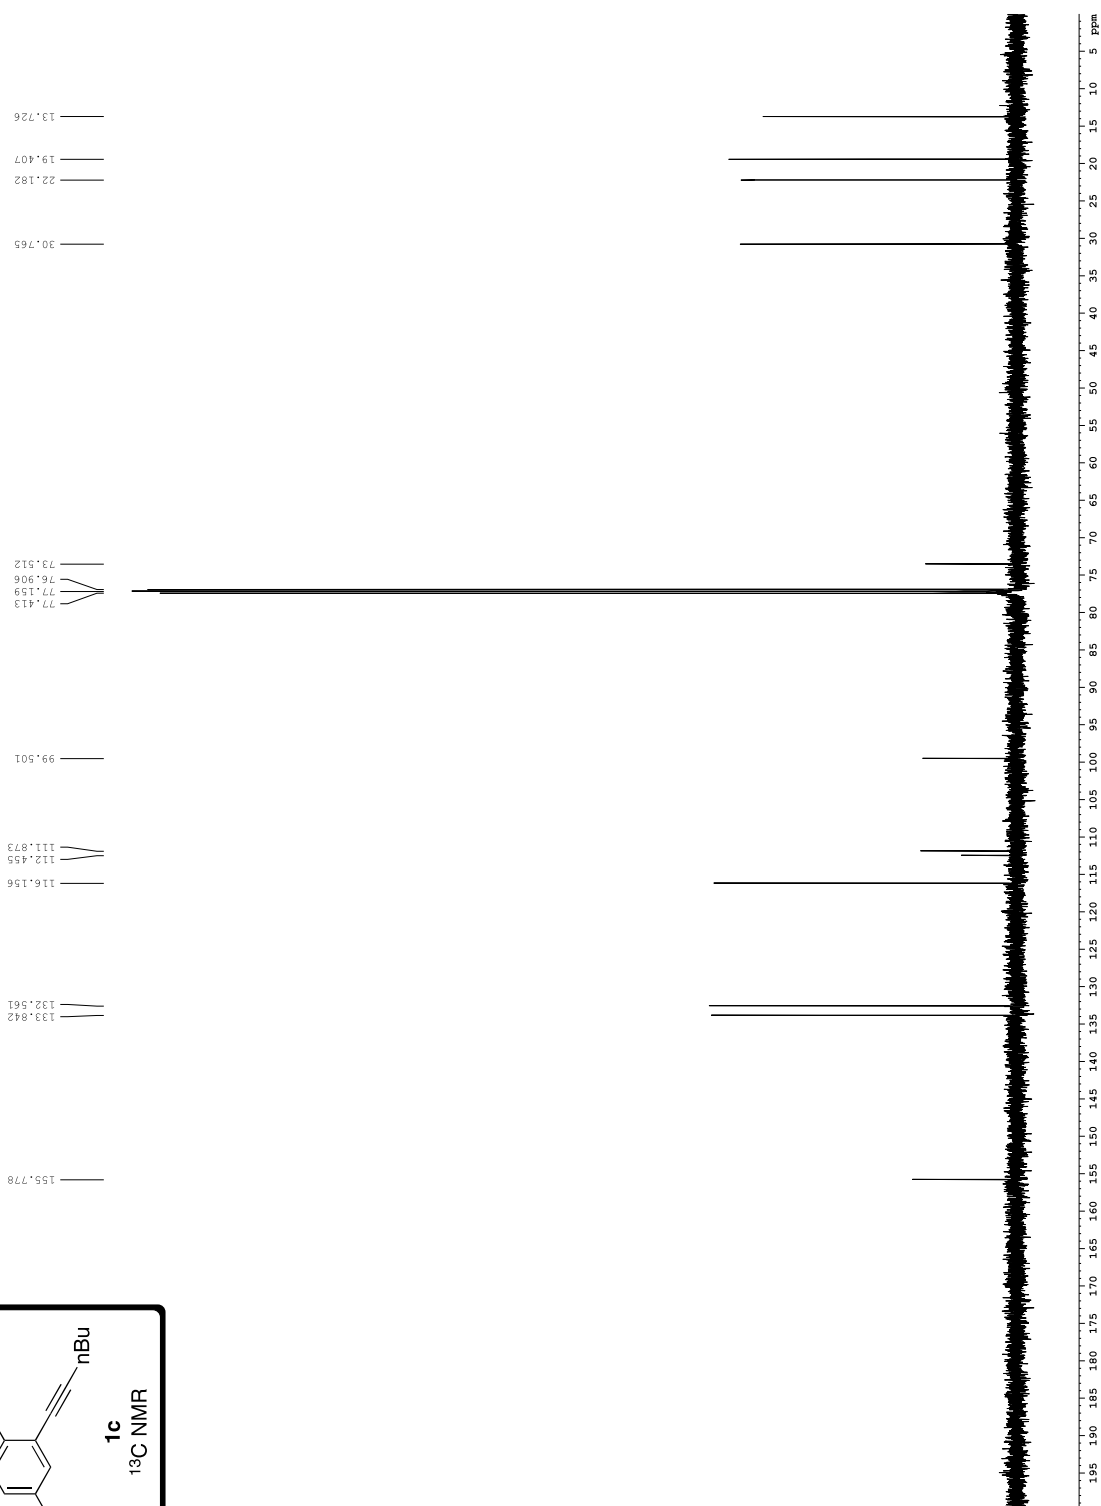

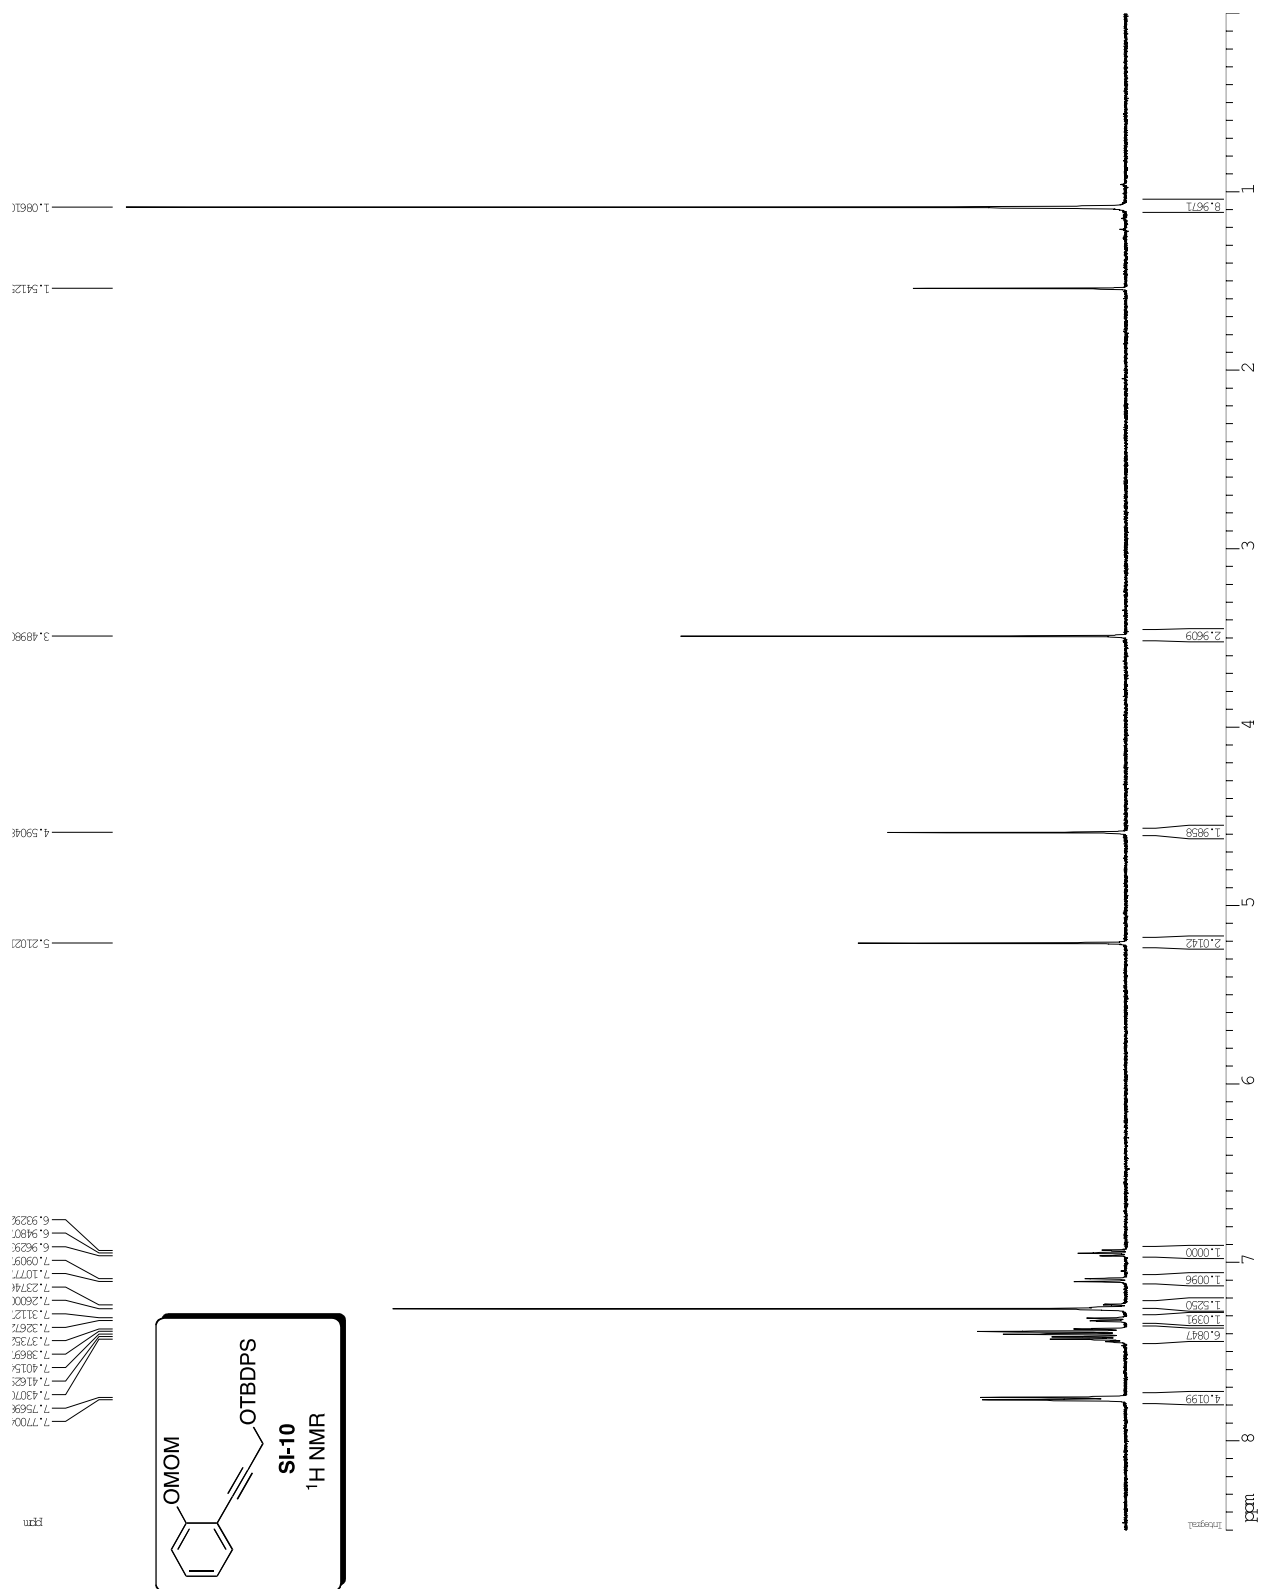

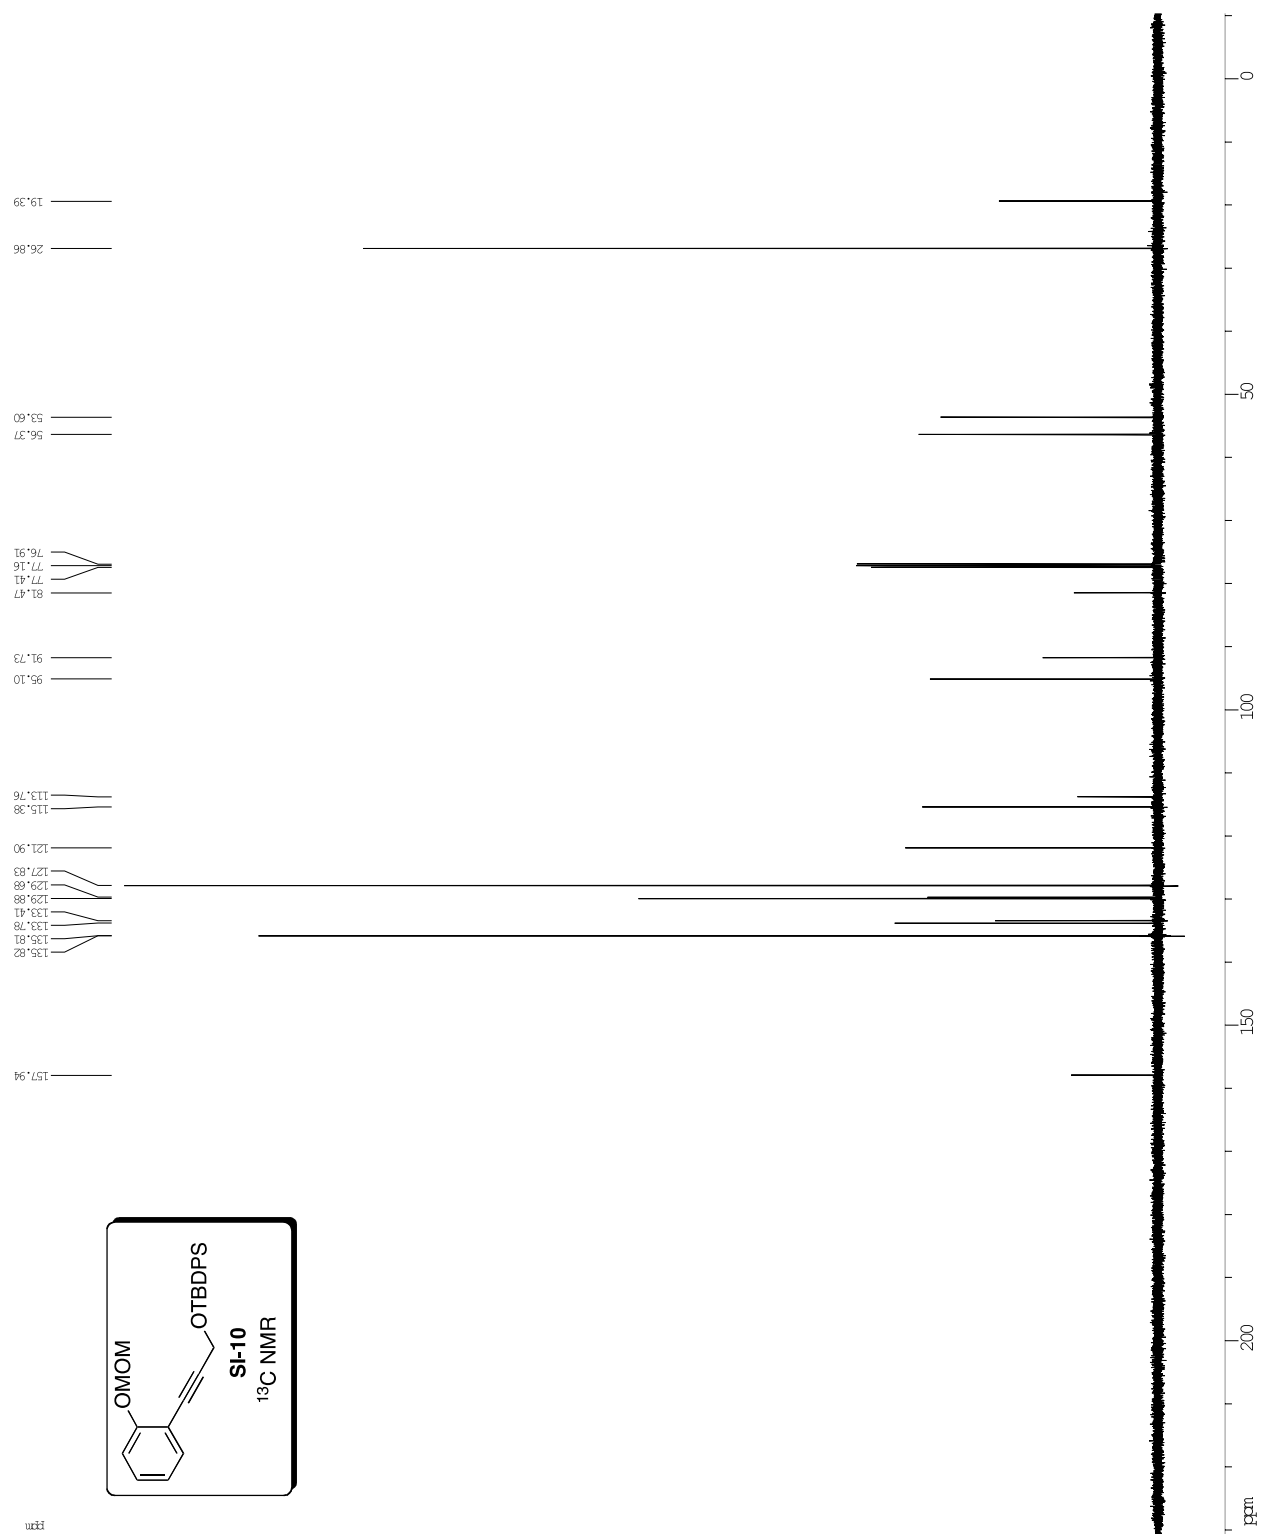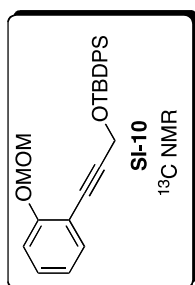

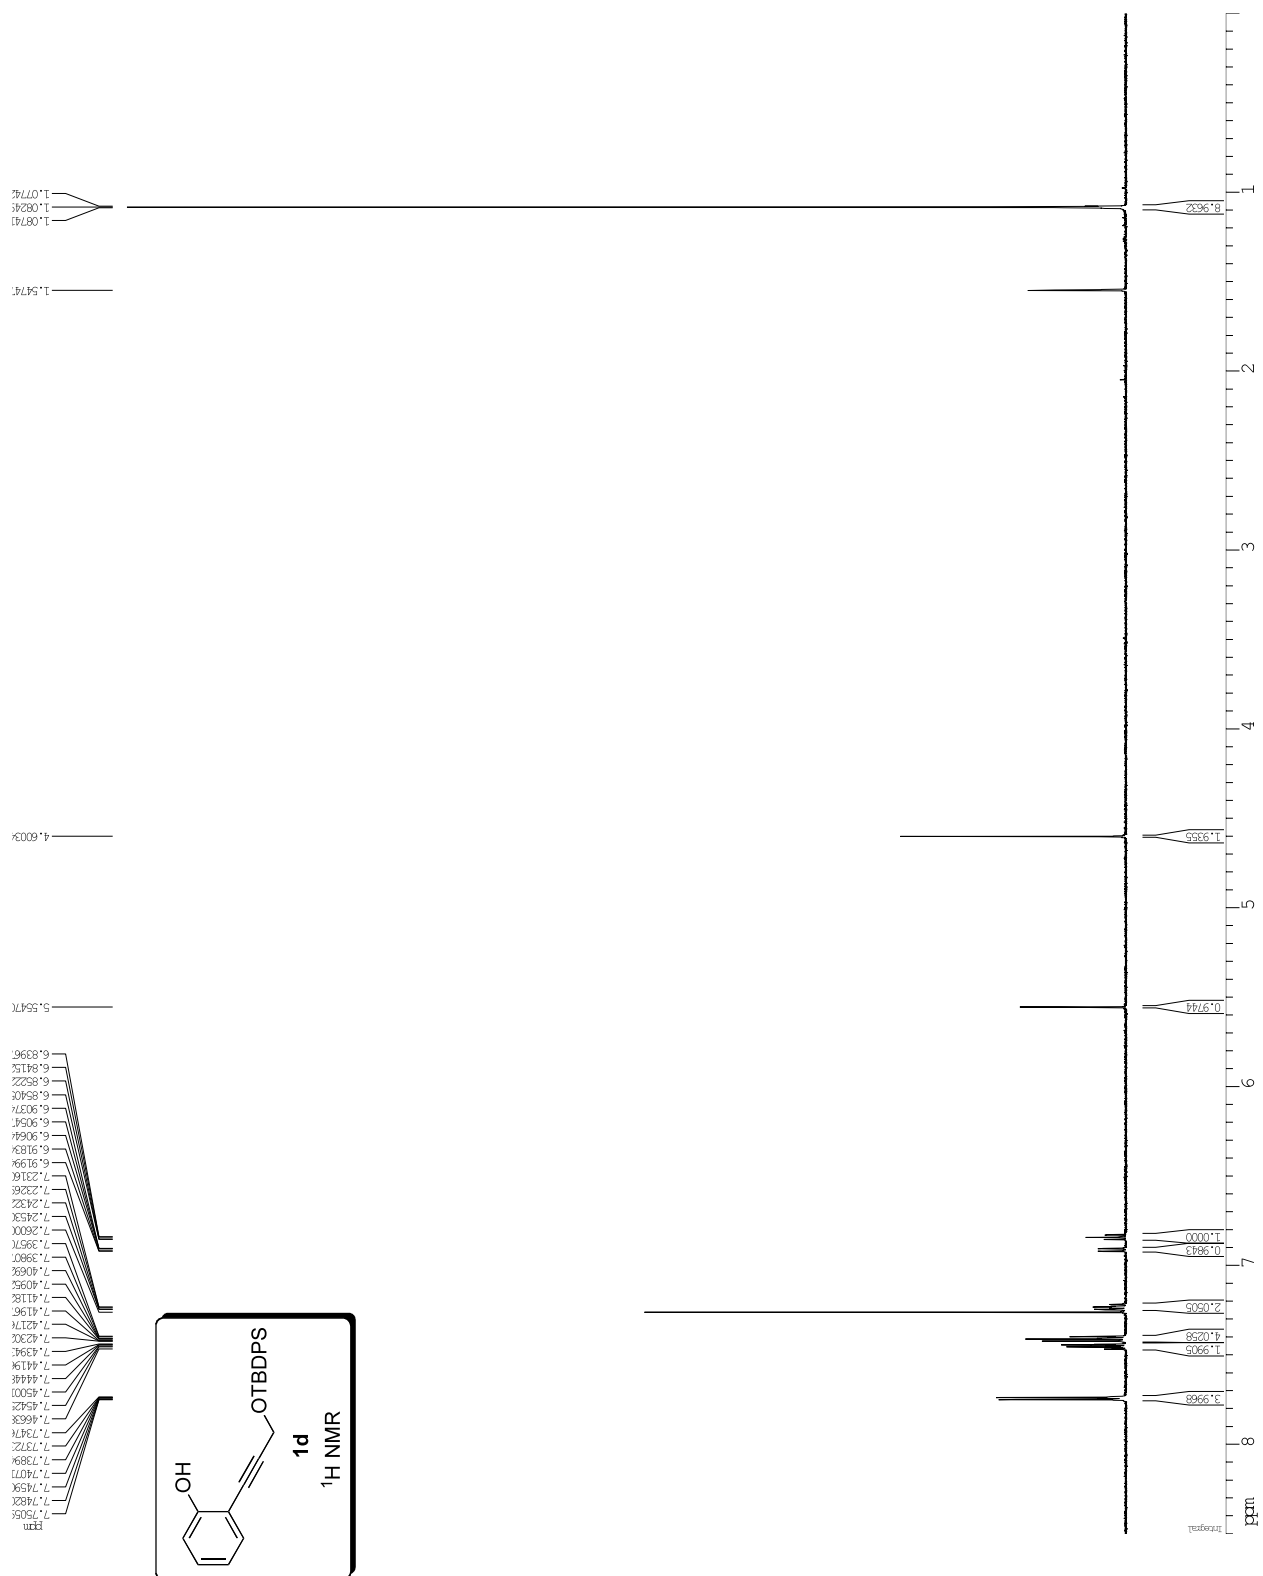

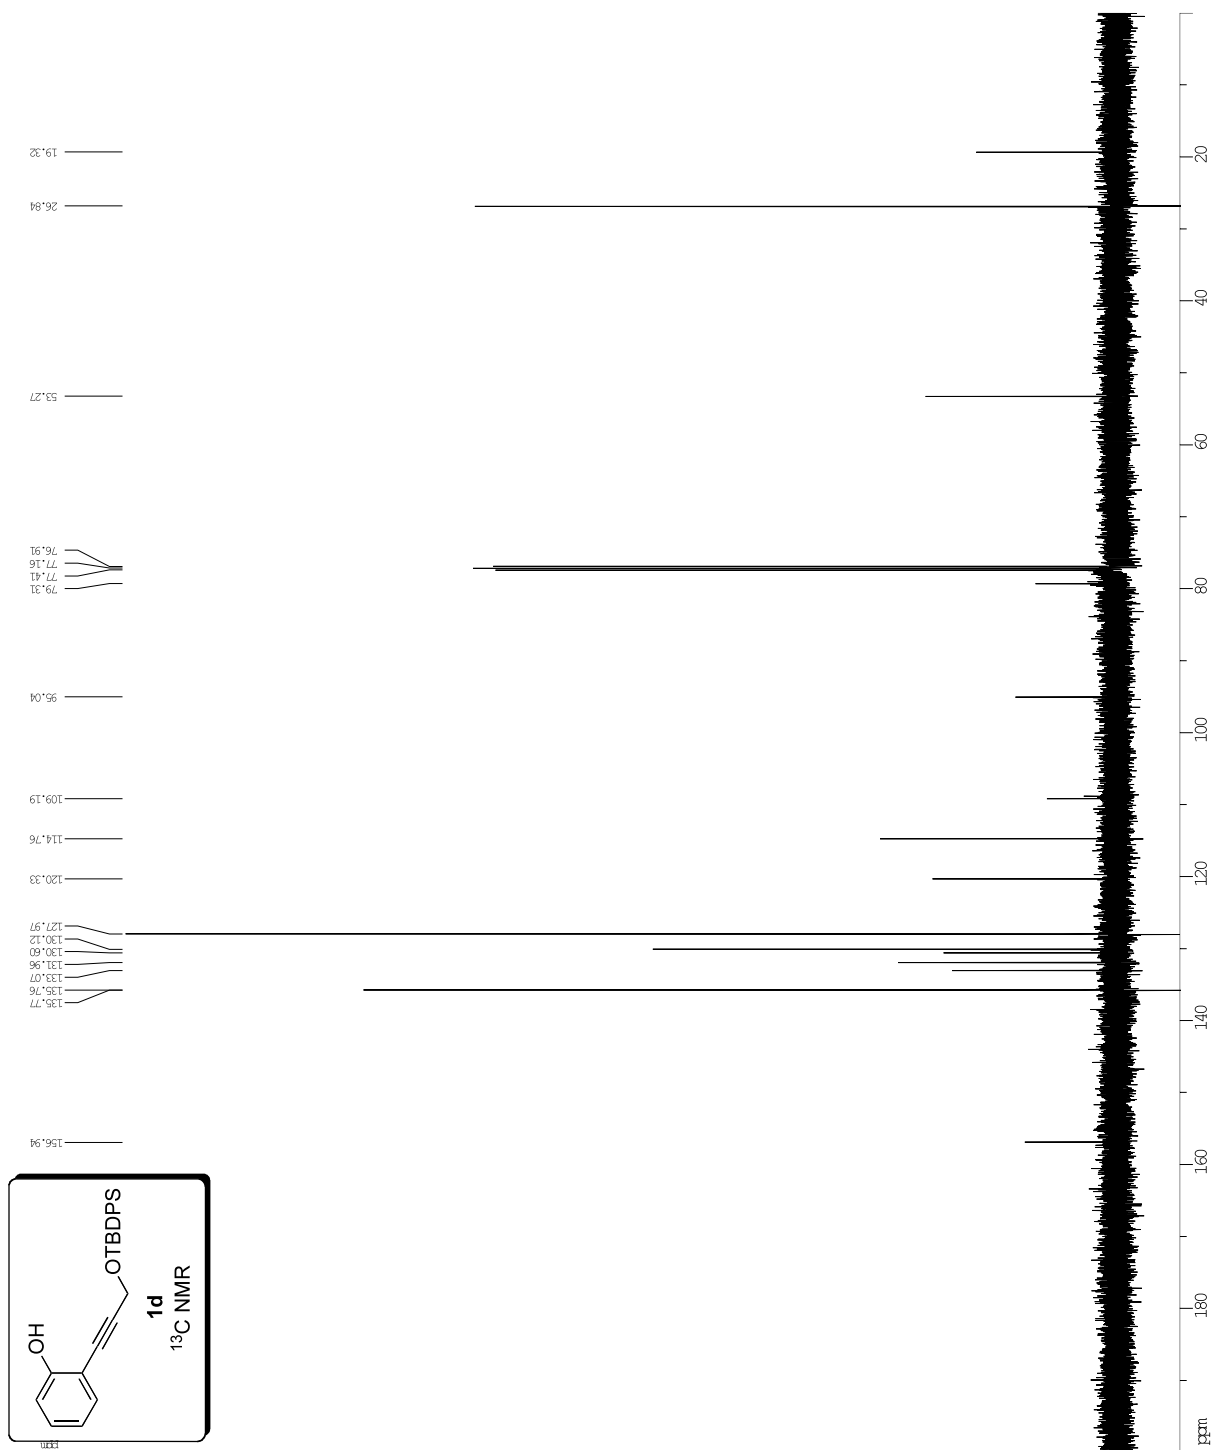

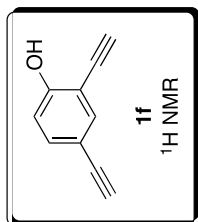

7.338  
 7.323  
 7.270  
 7.090  
 7.087  
 7.025  
 7.012  
 7.009

5.814

3.552

3.157

2.183

1.582

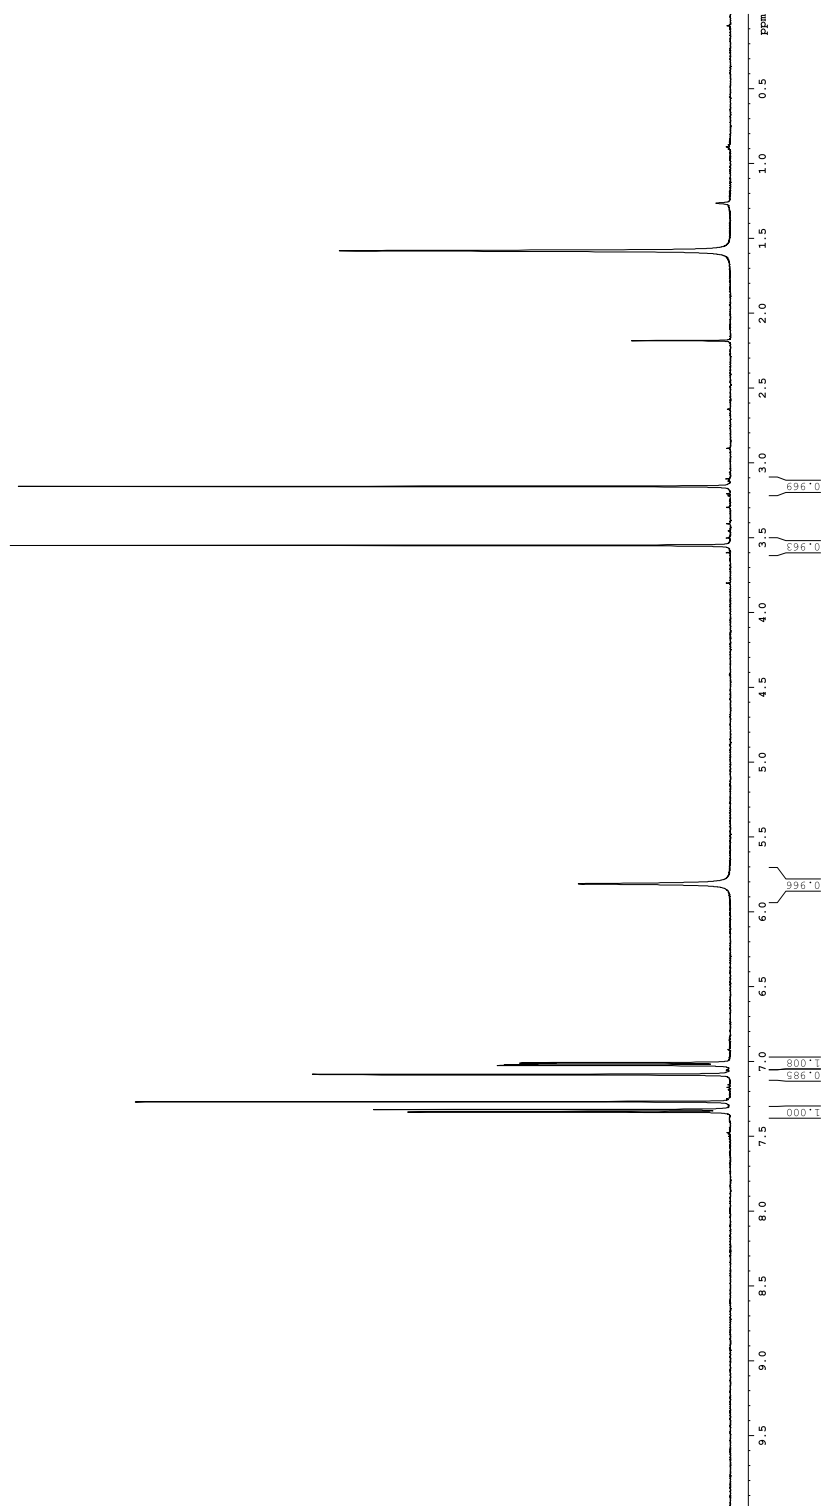

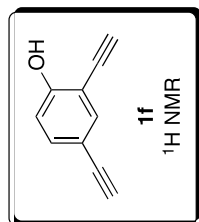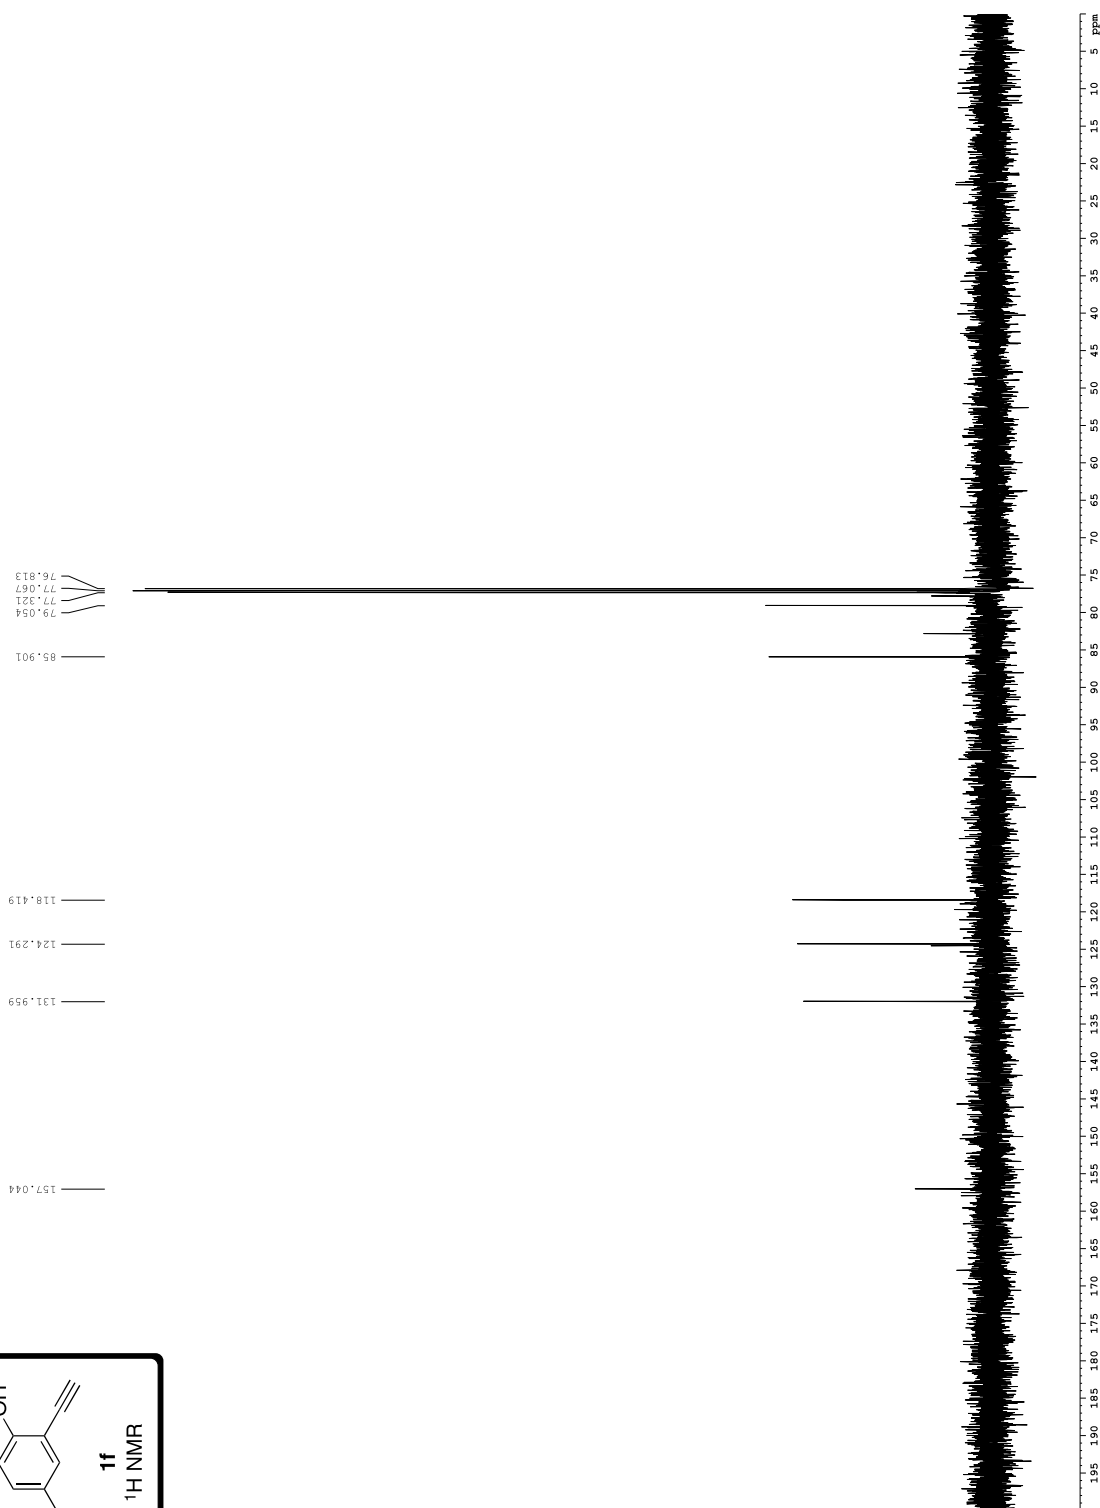

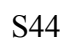



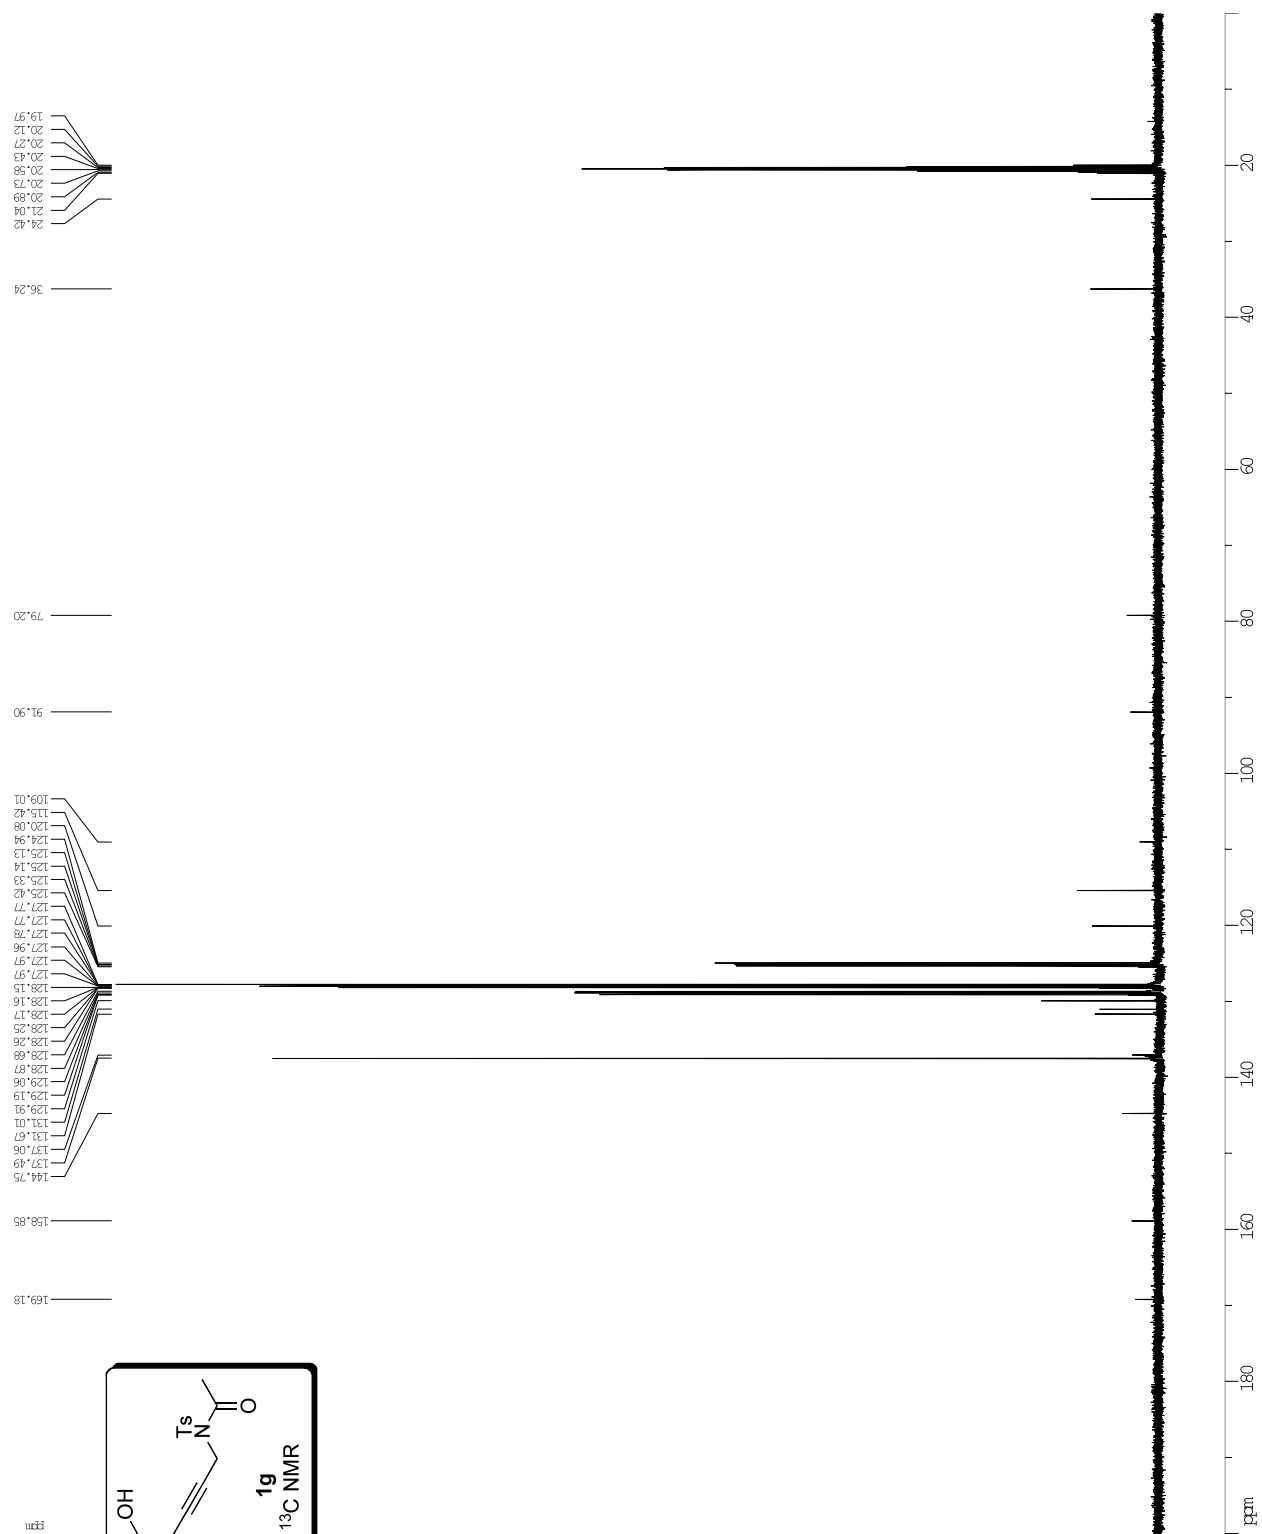

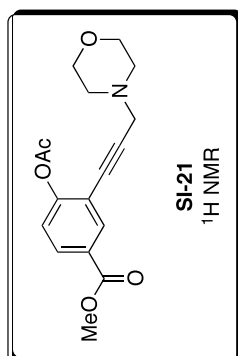

7.270  
7.184  
7.167

8.176  
8.172  
8.018  
8.014  
8.001  
7.997

3.921  
3.781  
3.712  
3.763  
3.555

2.645  
2.636  
2.627  
2.368  
2.049

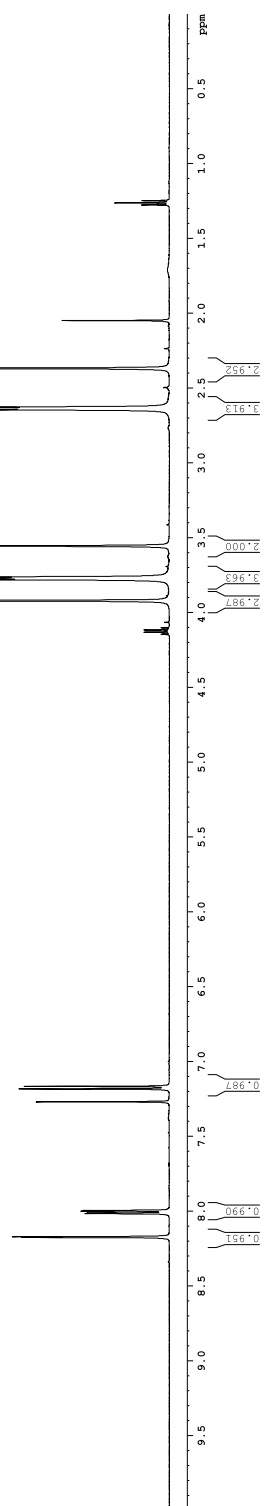

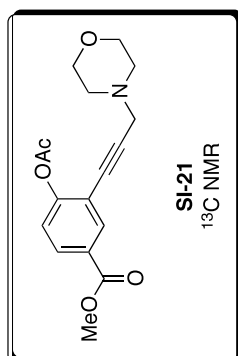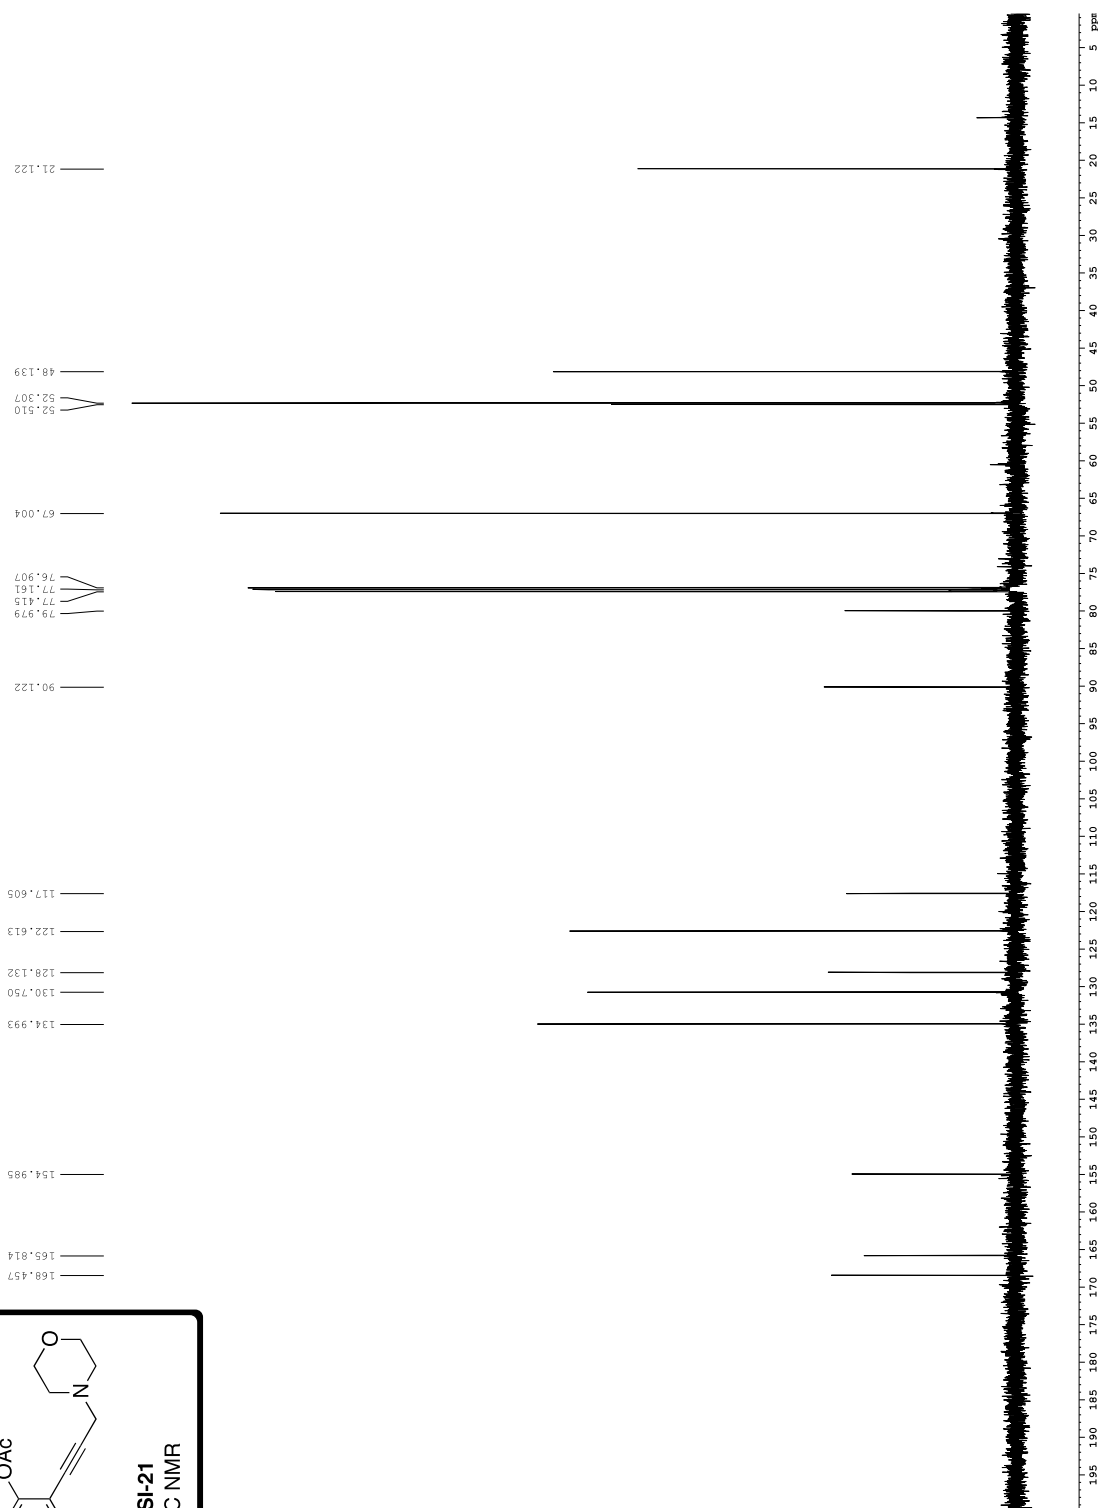

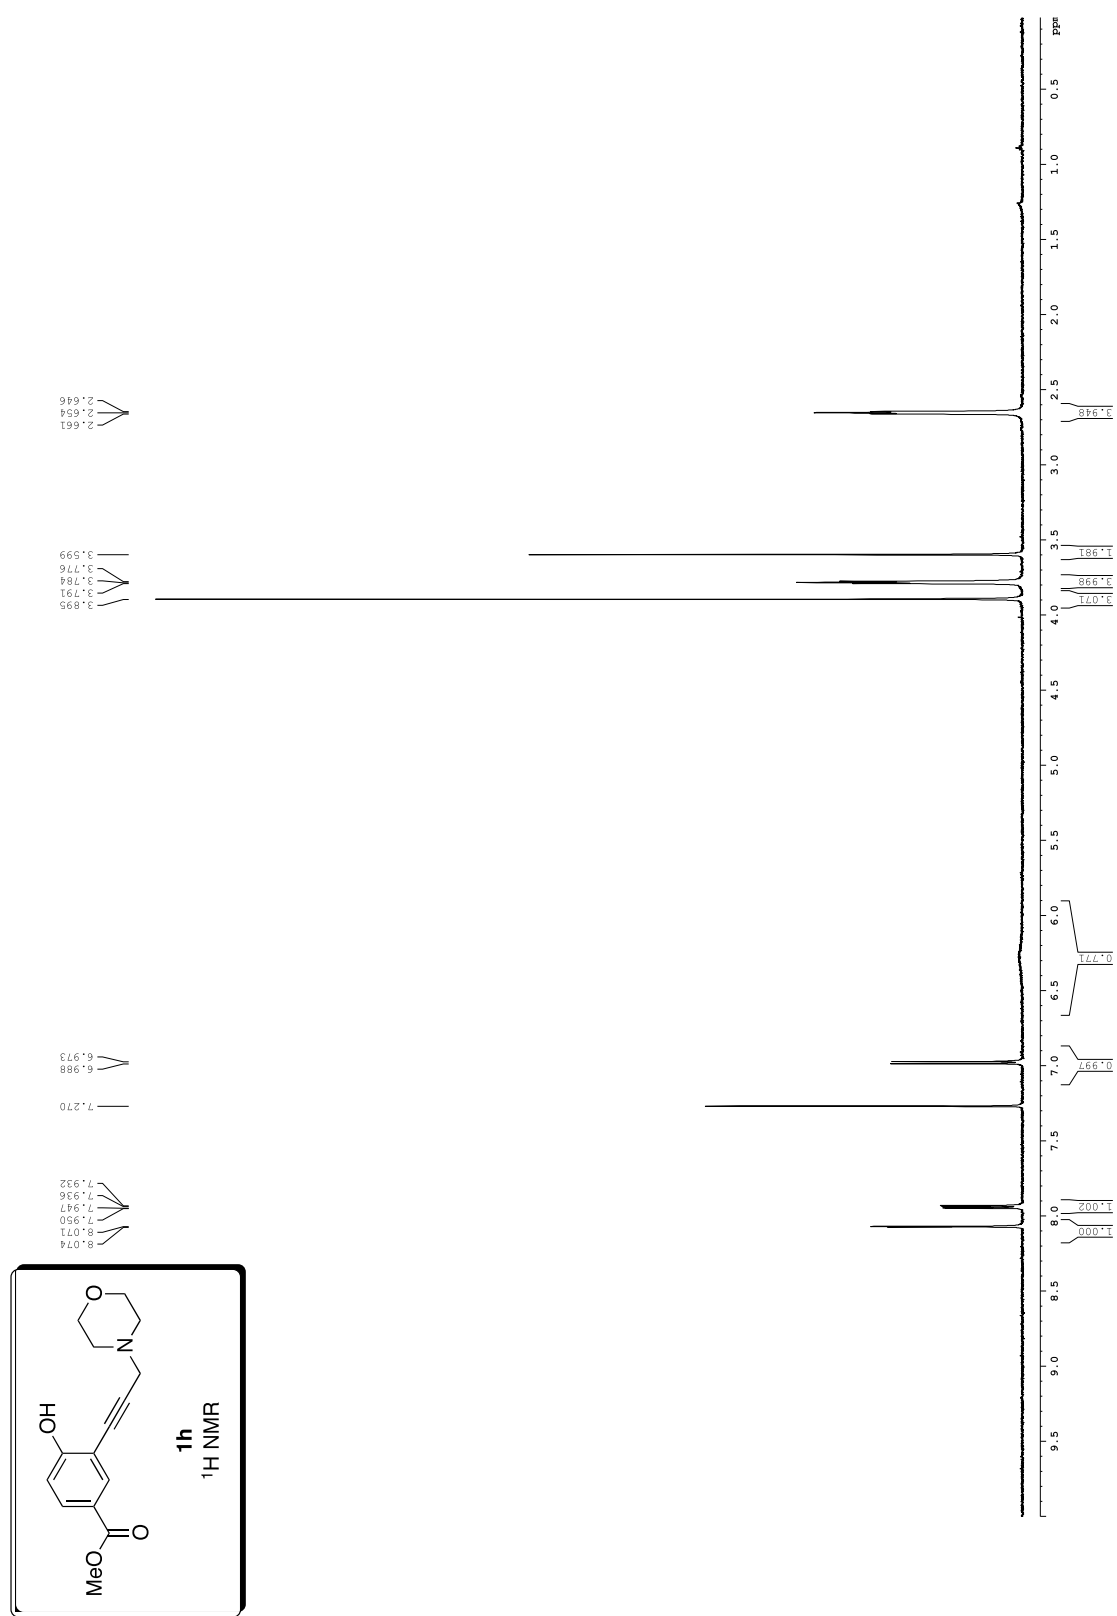

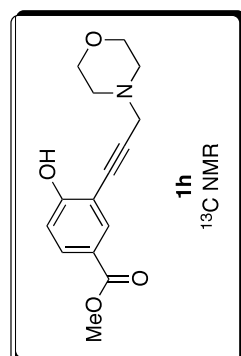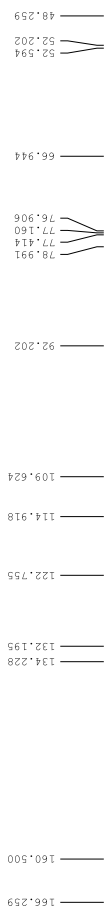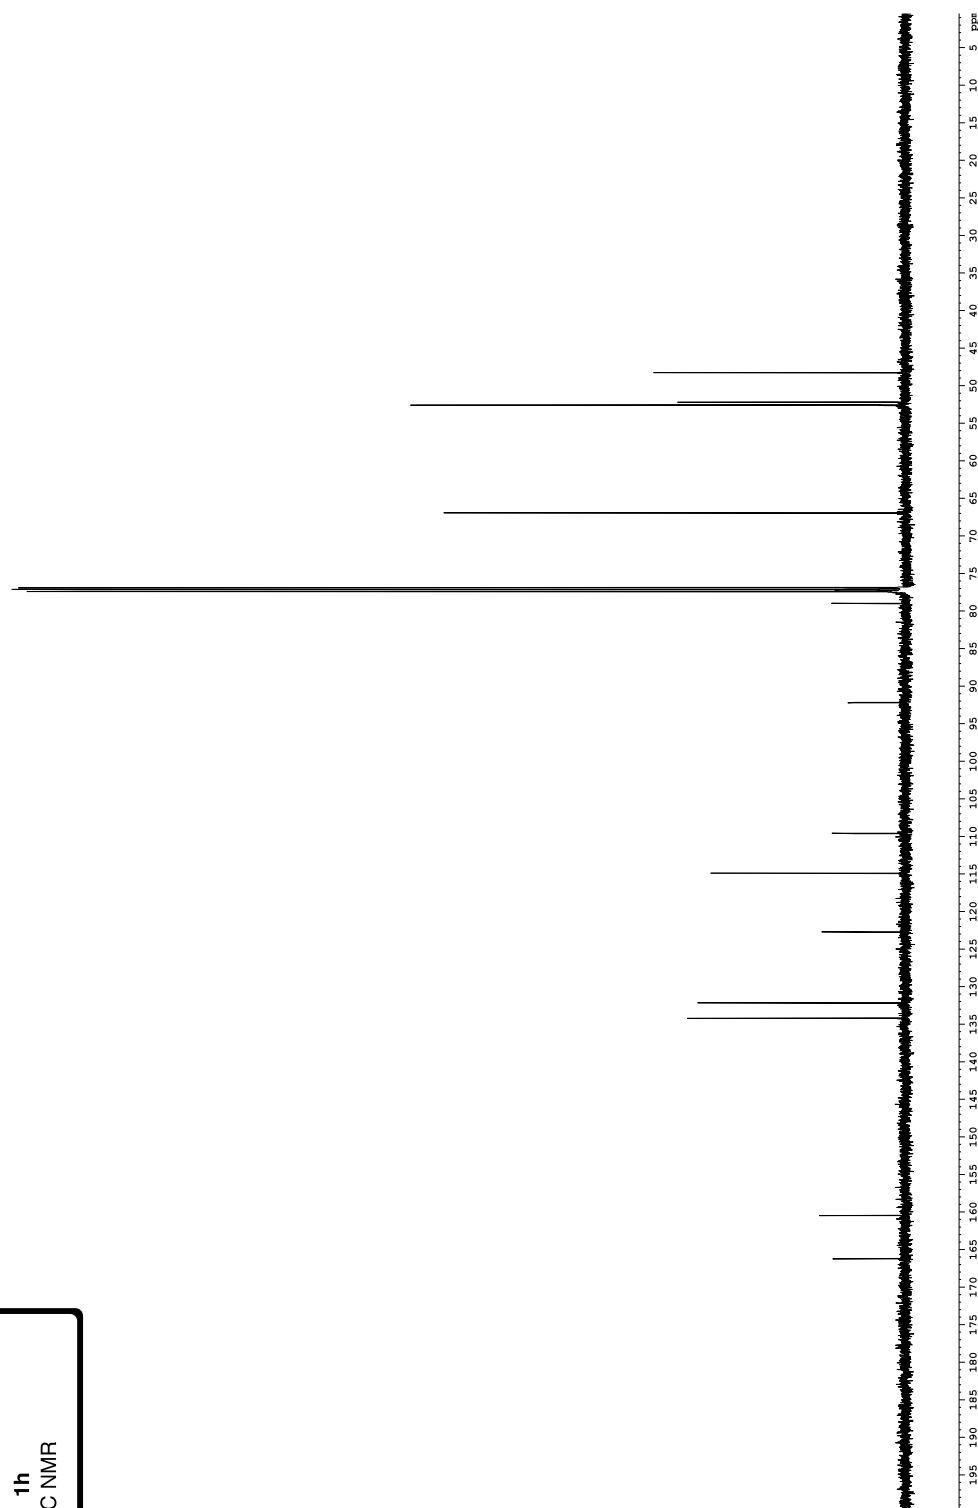

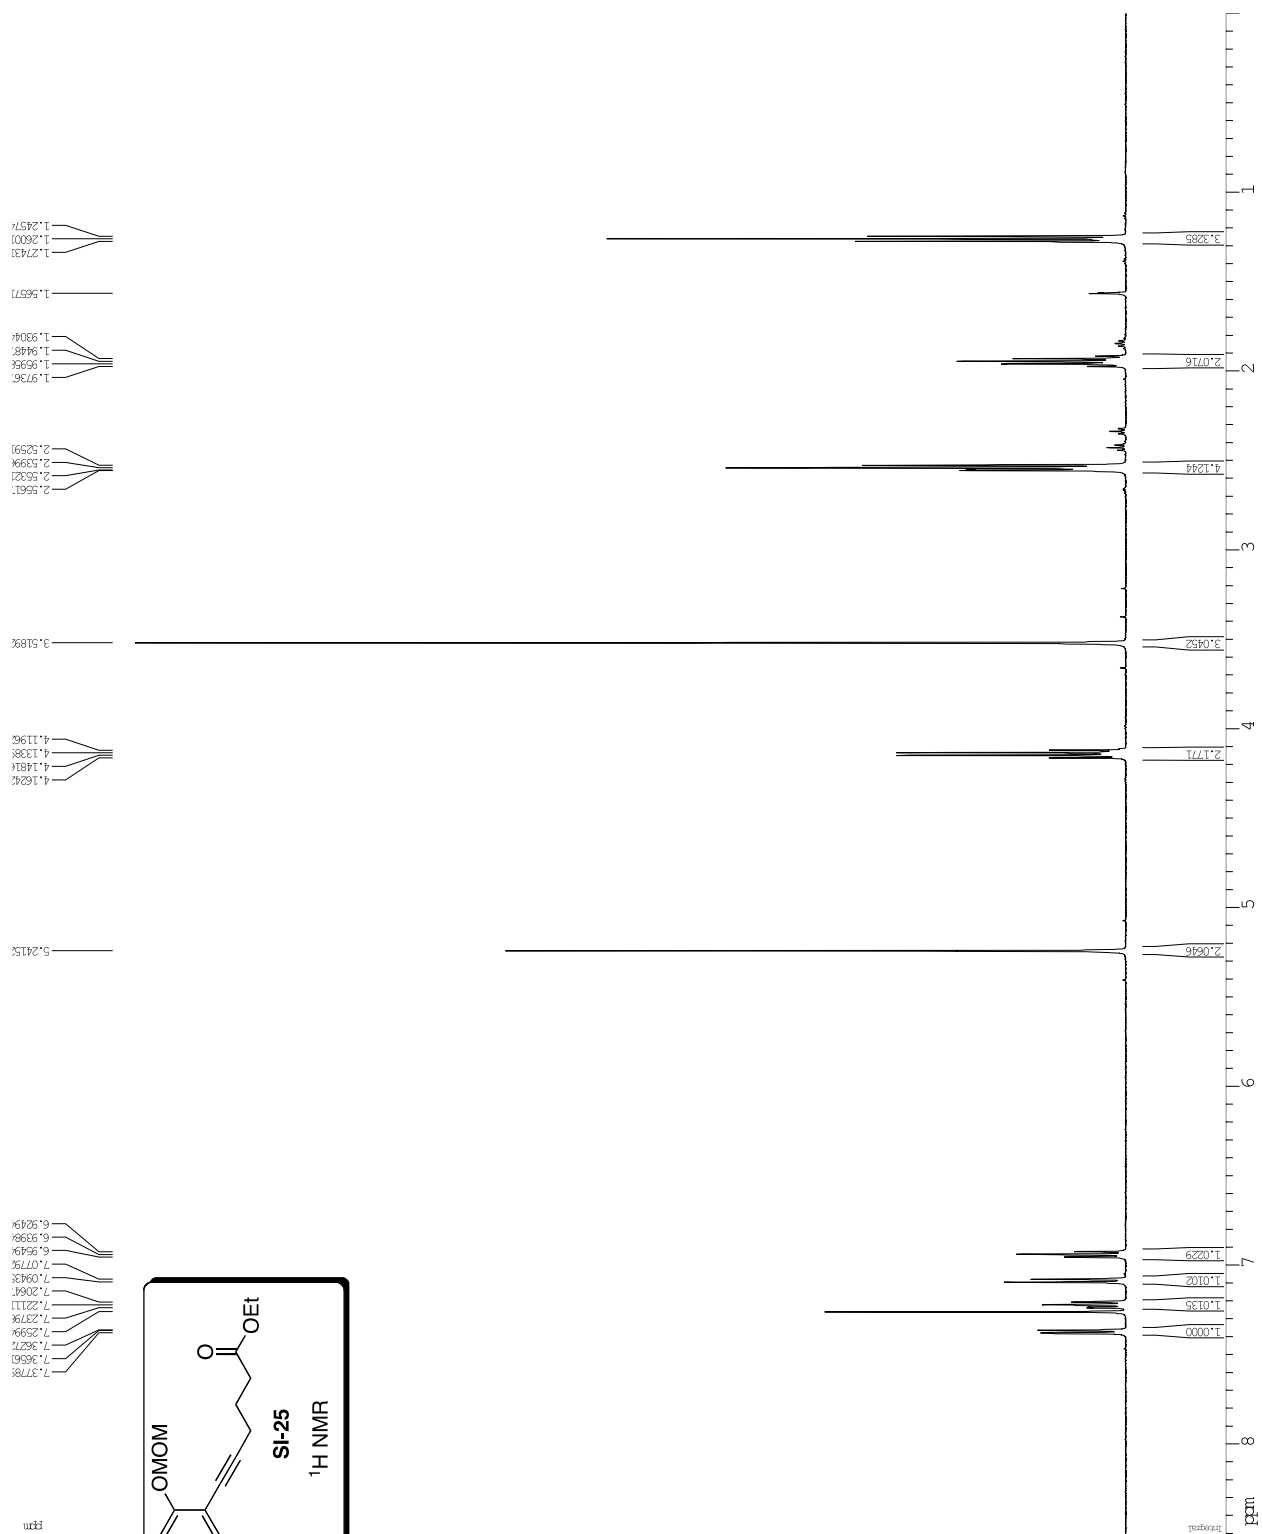

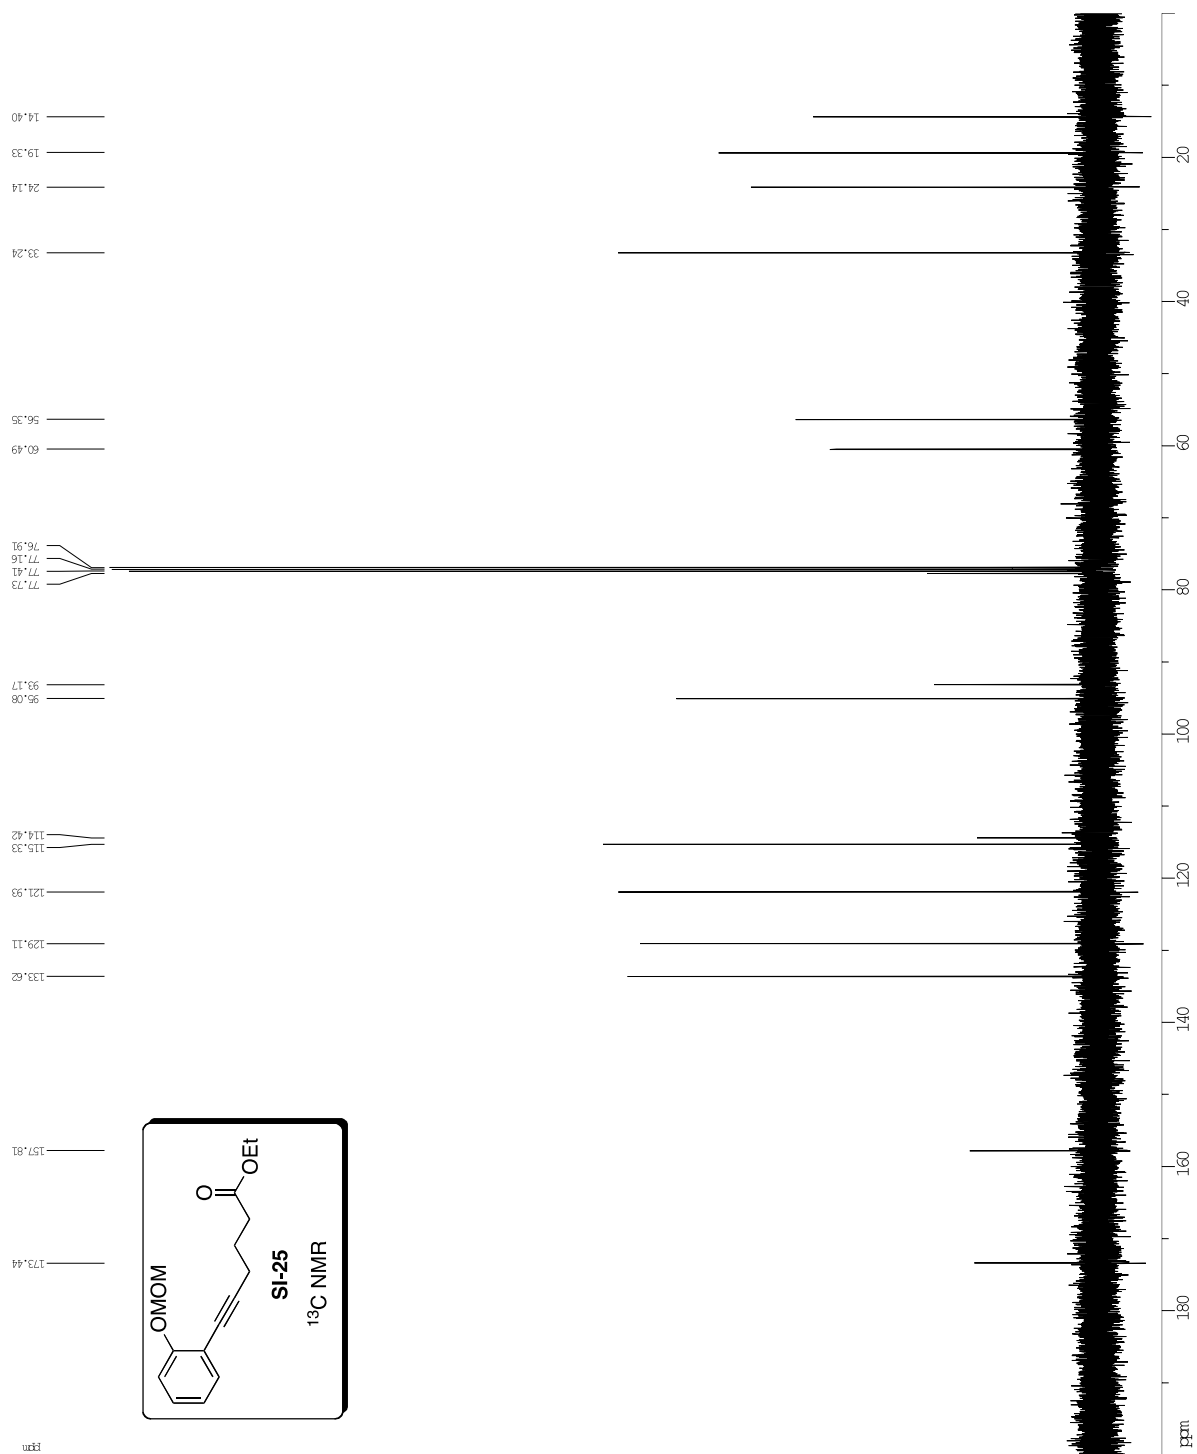

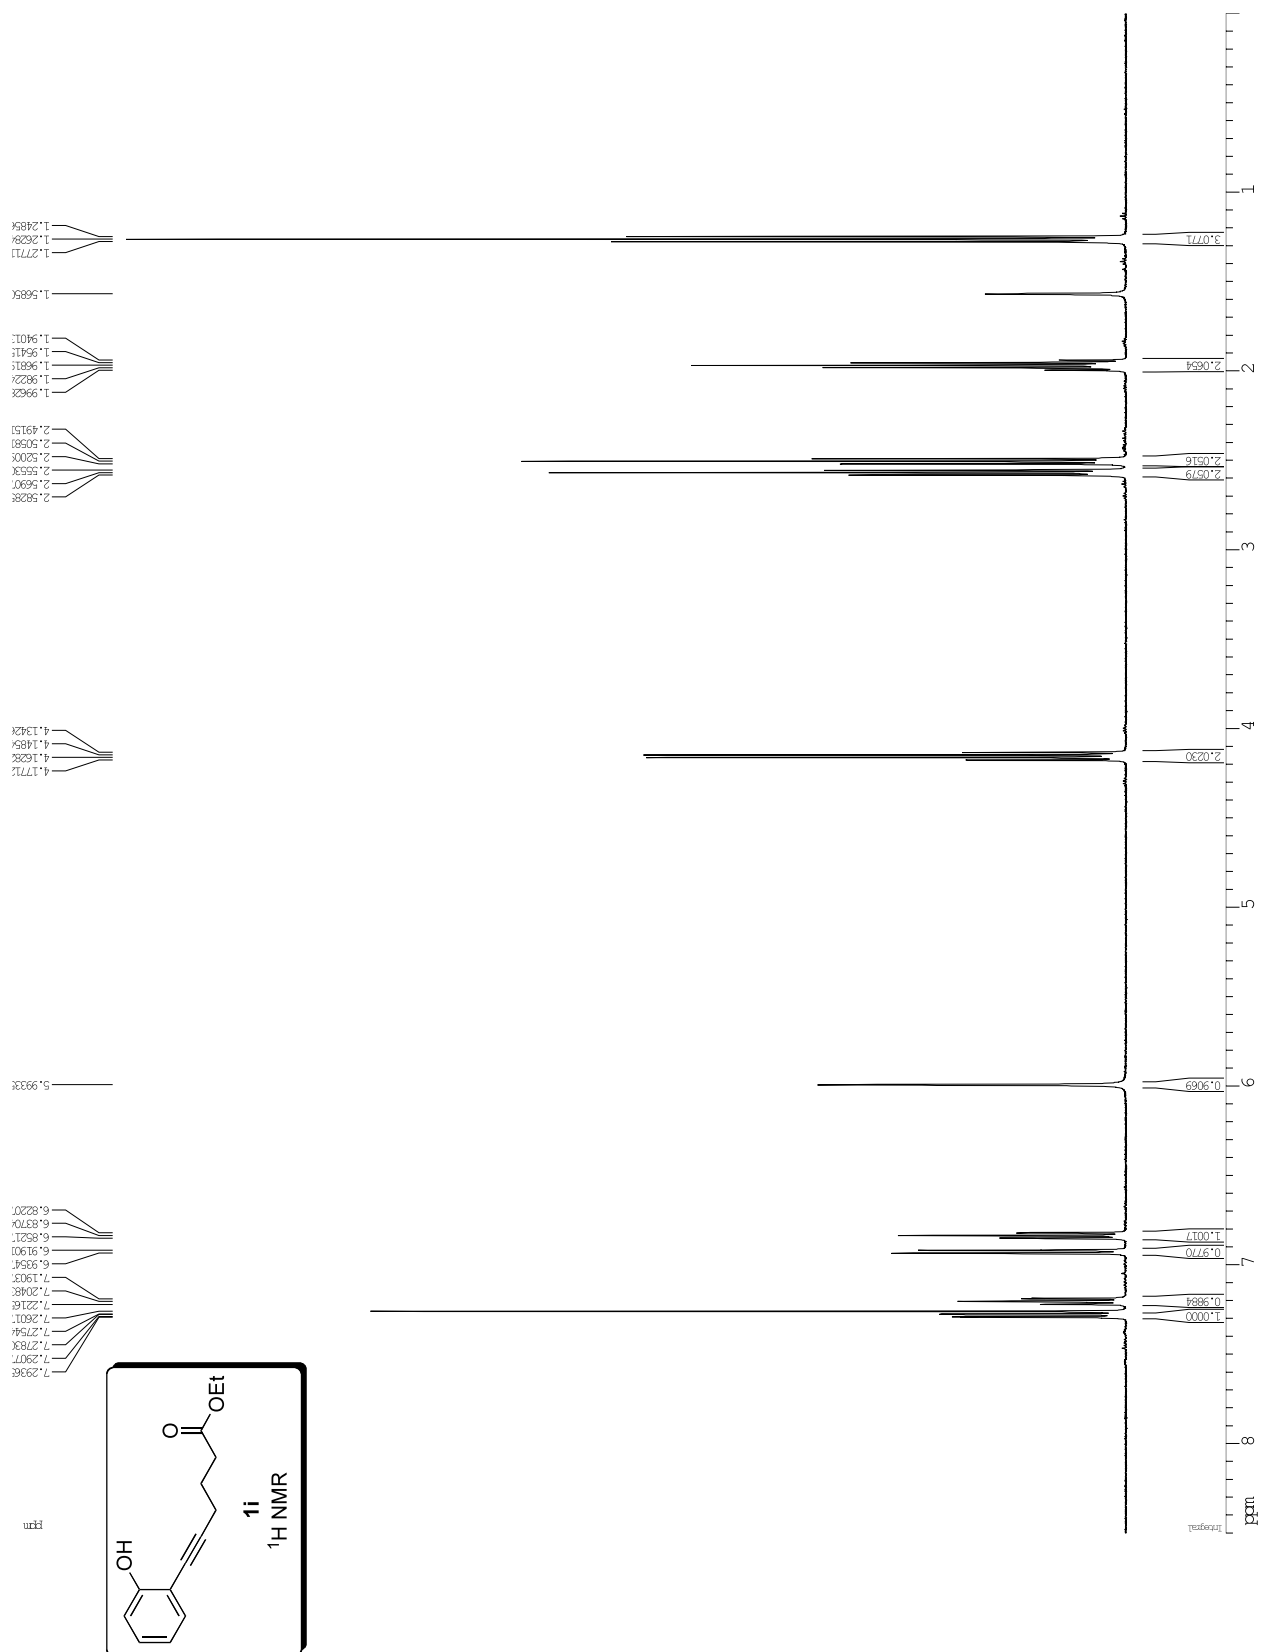



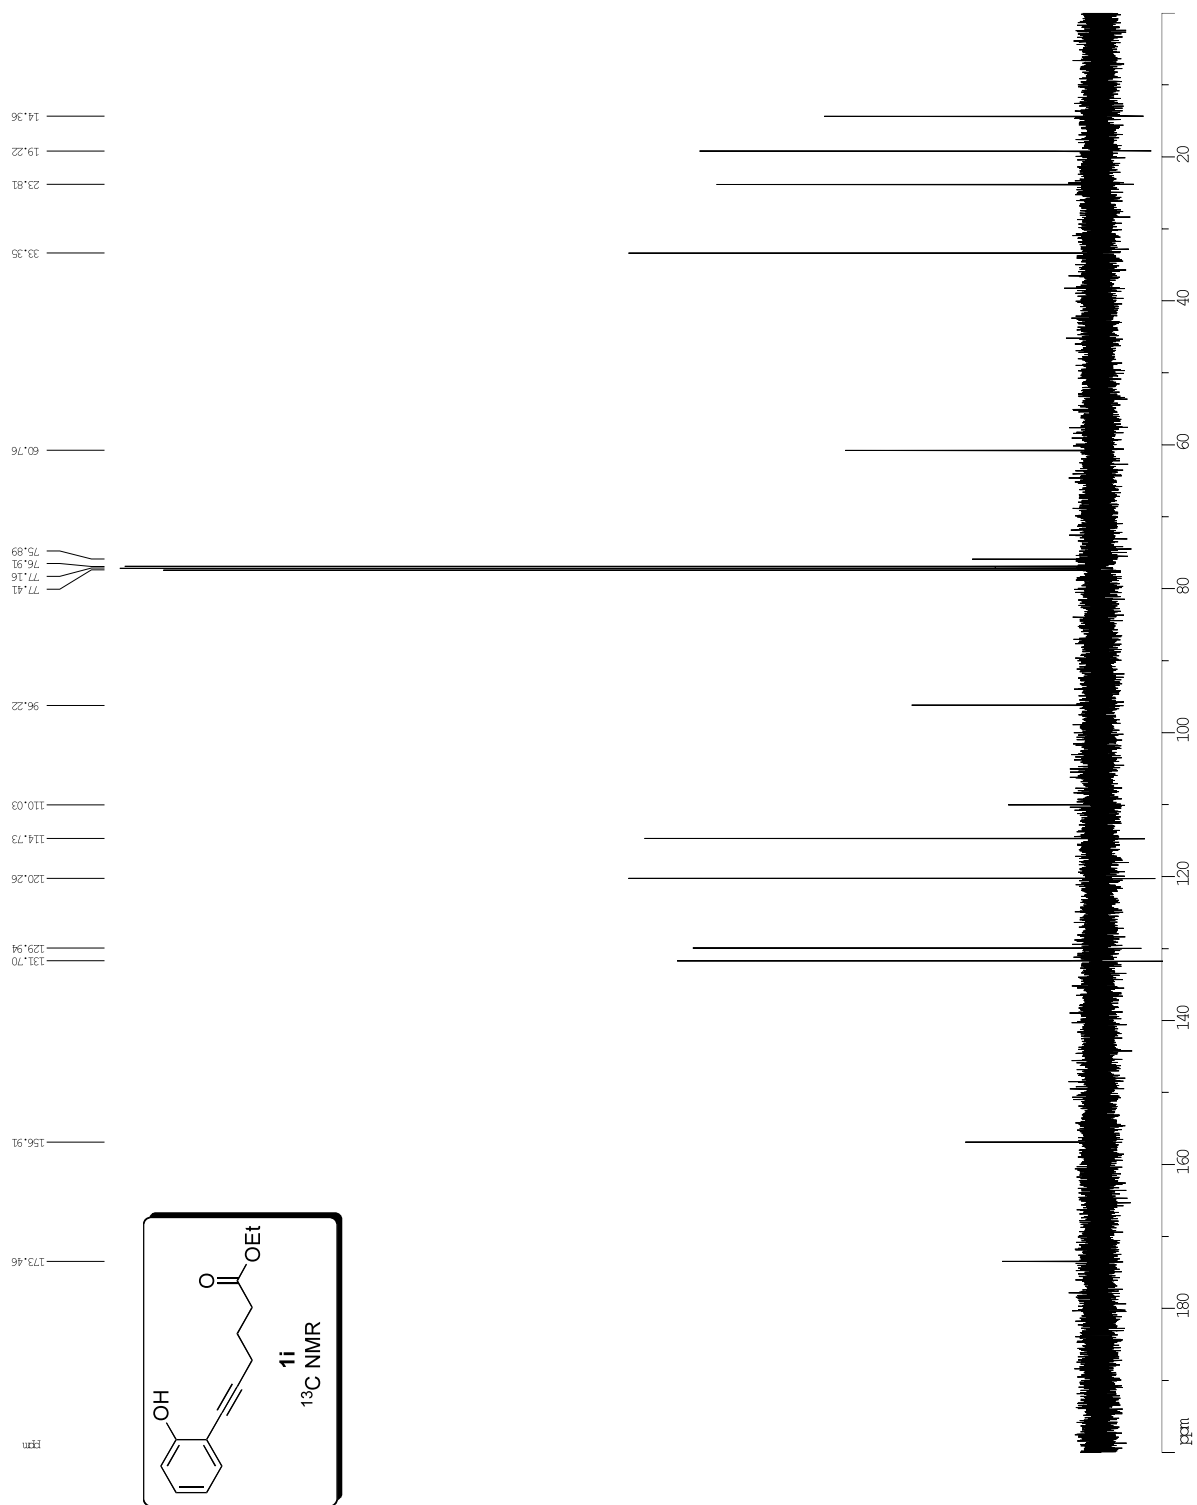

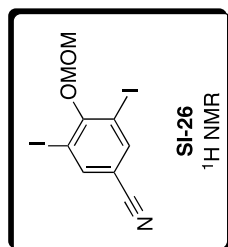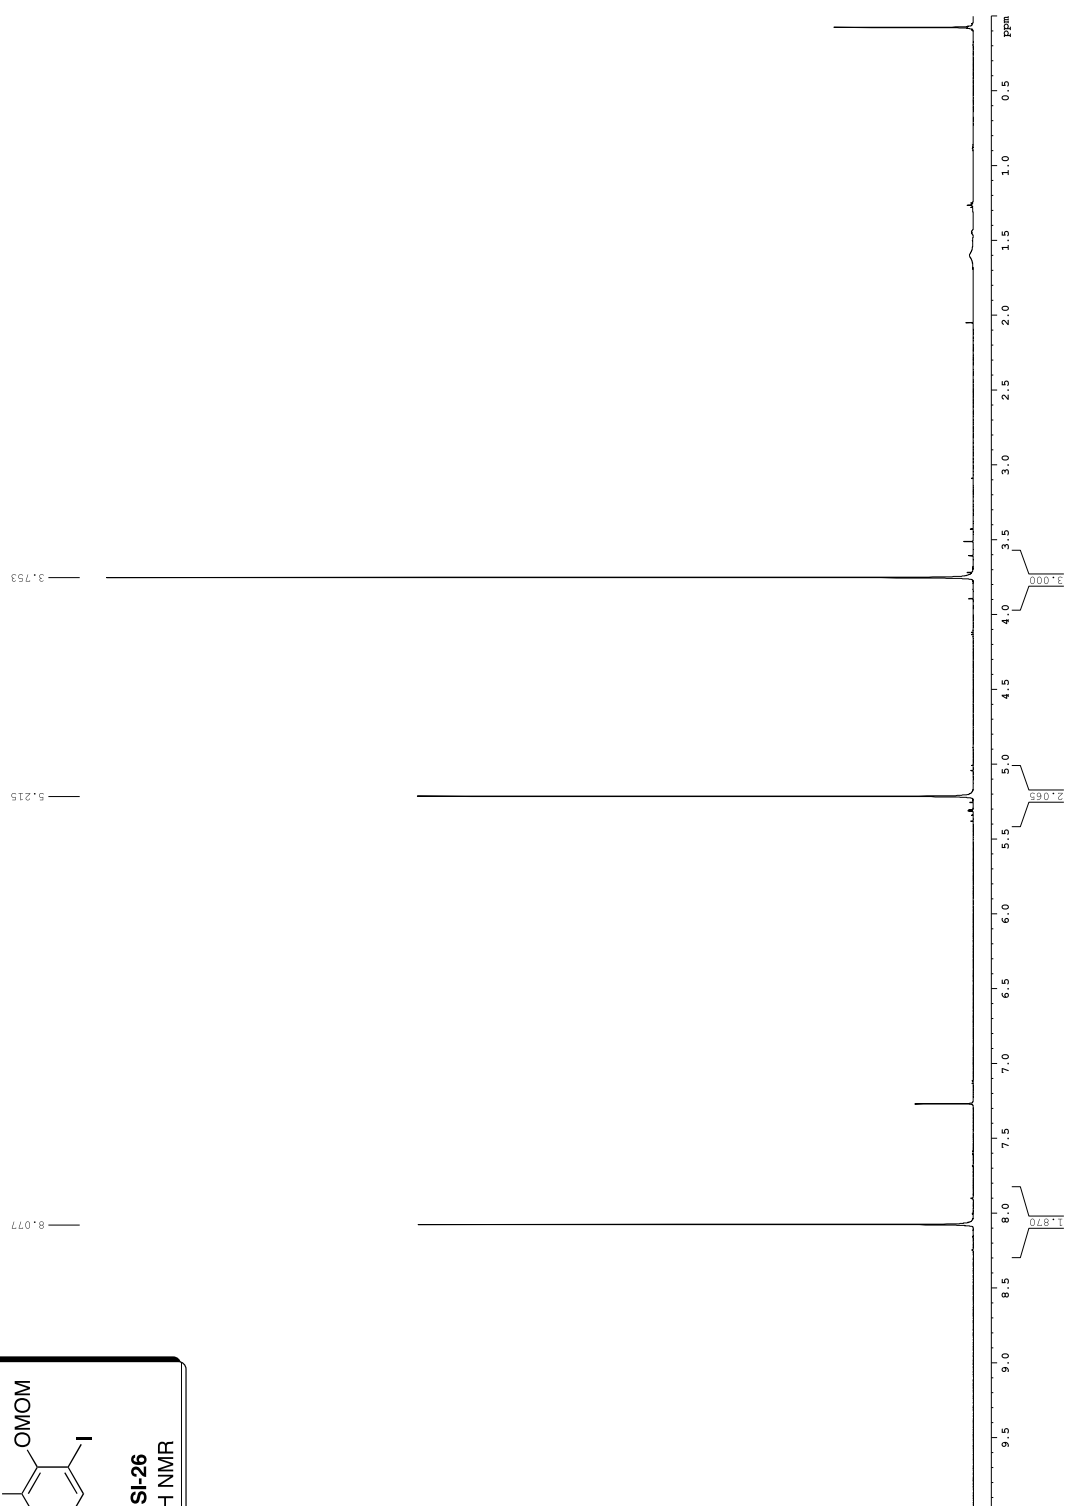

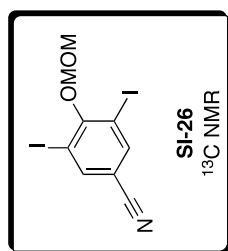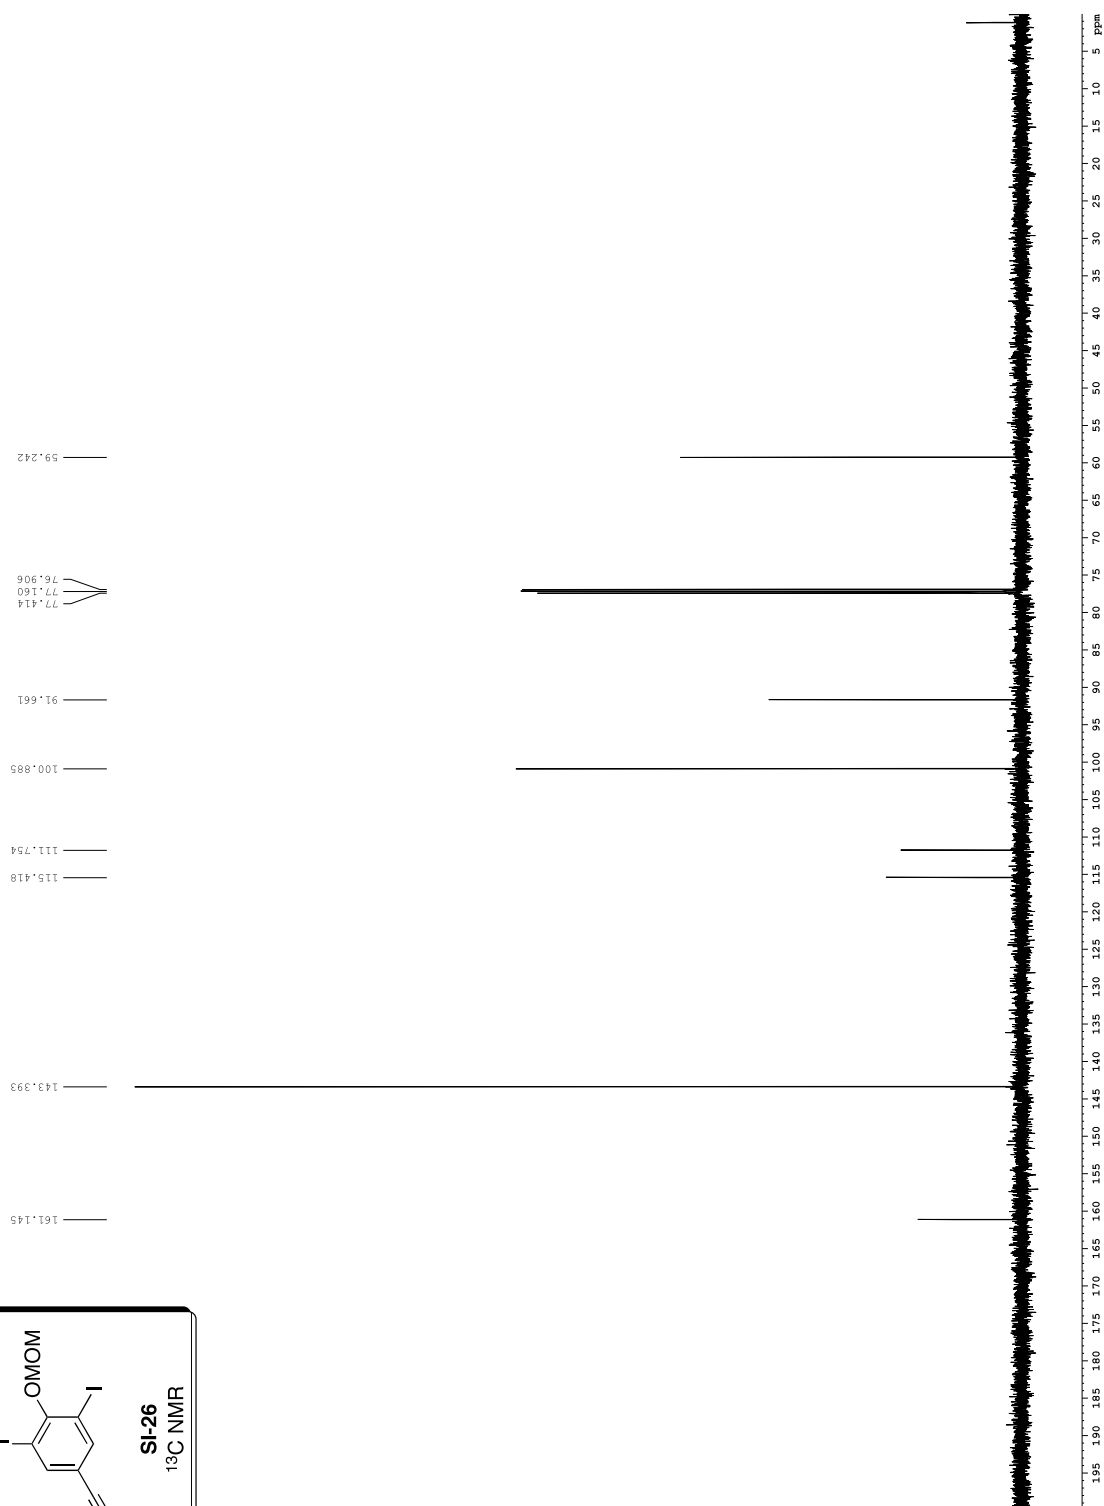

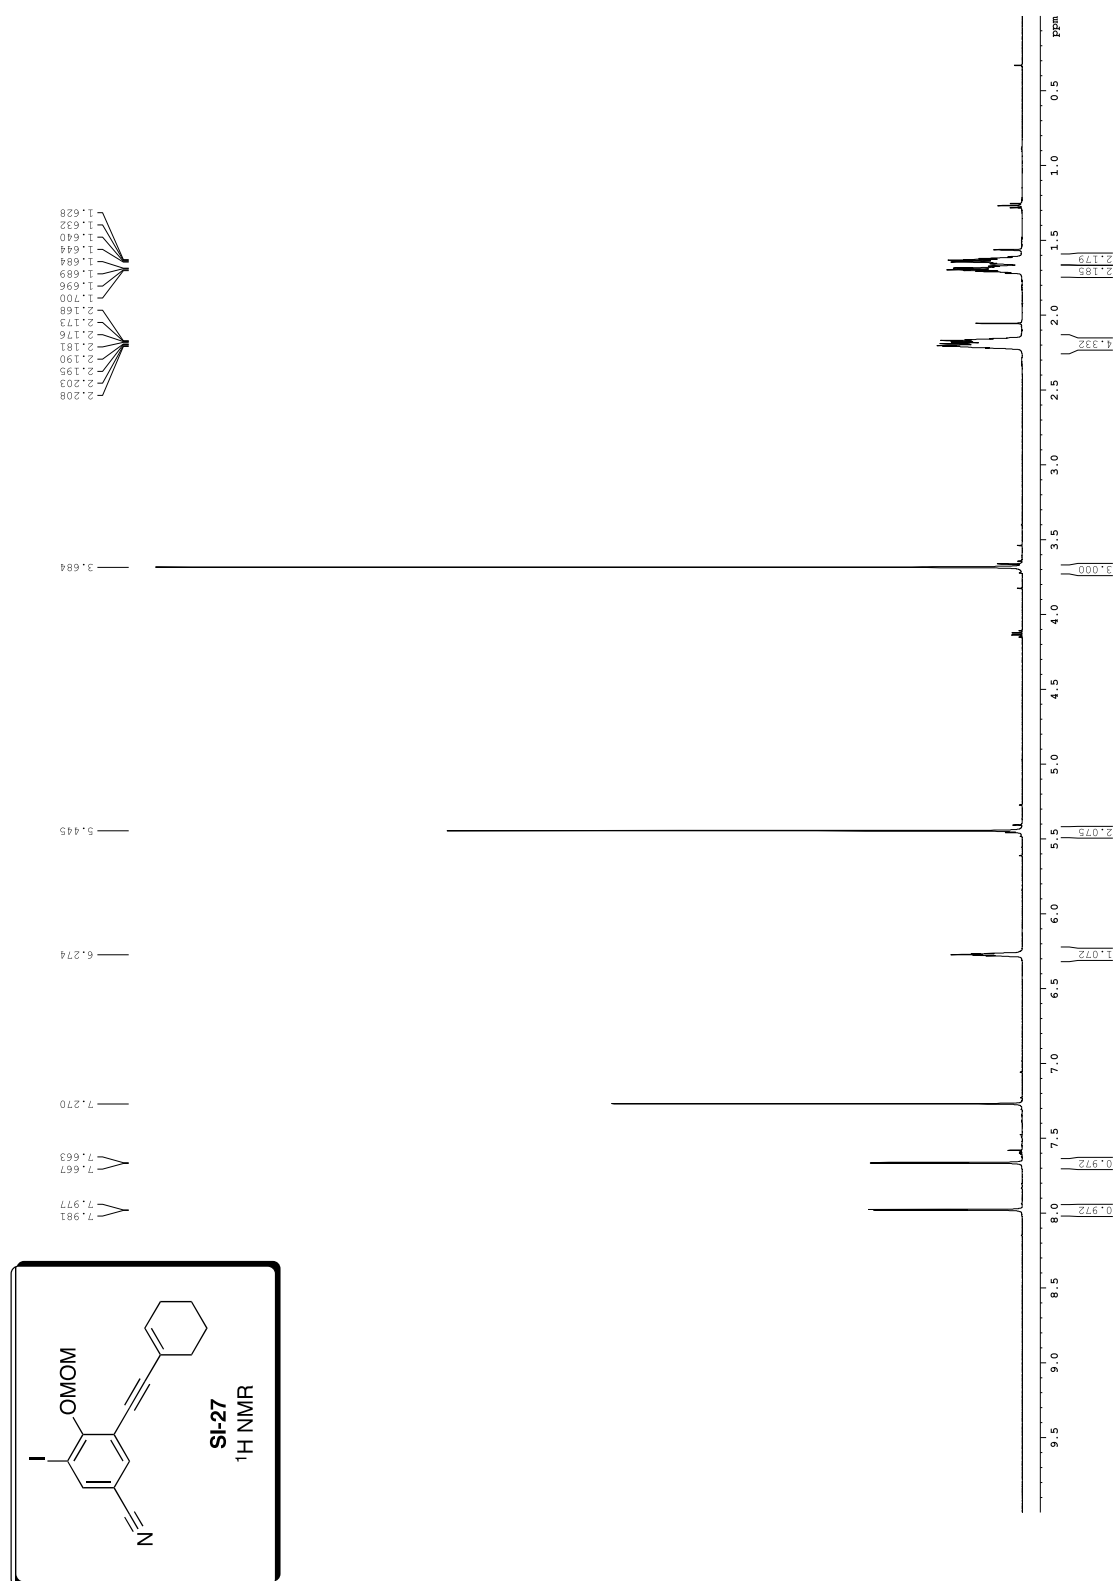

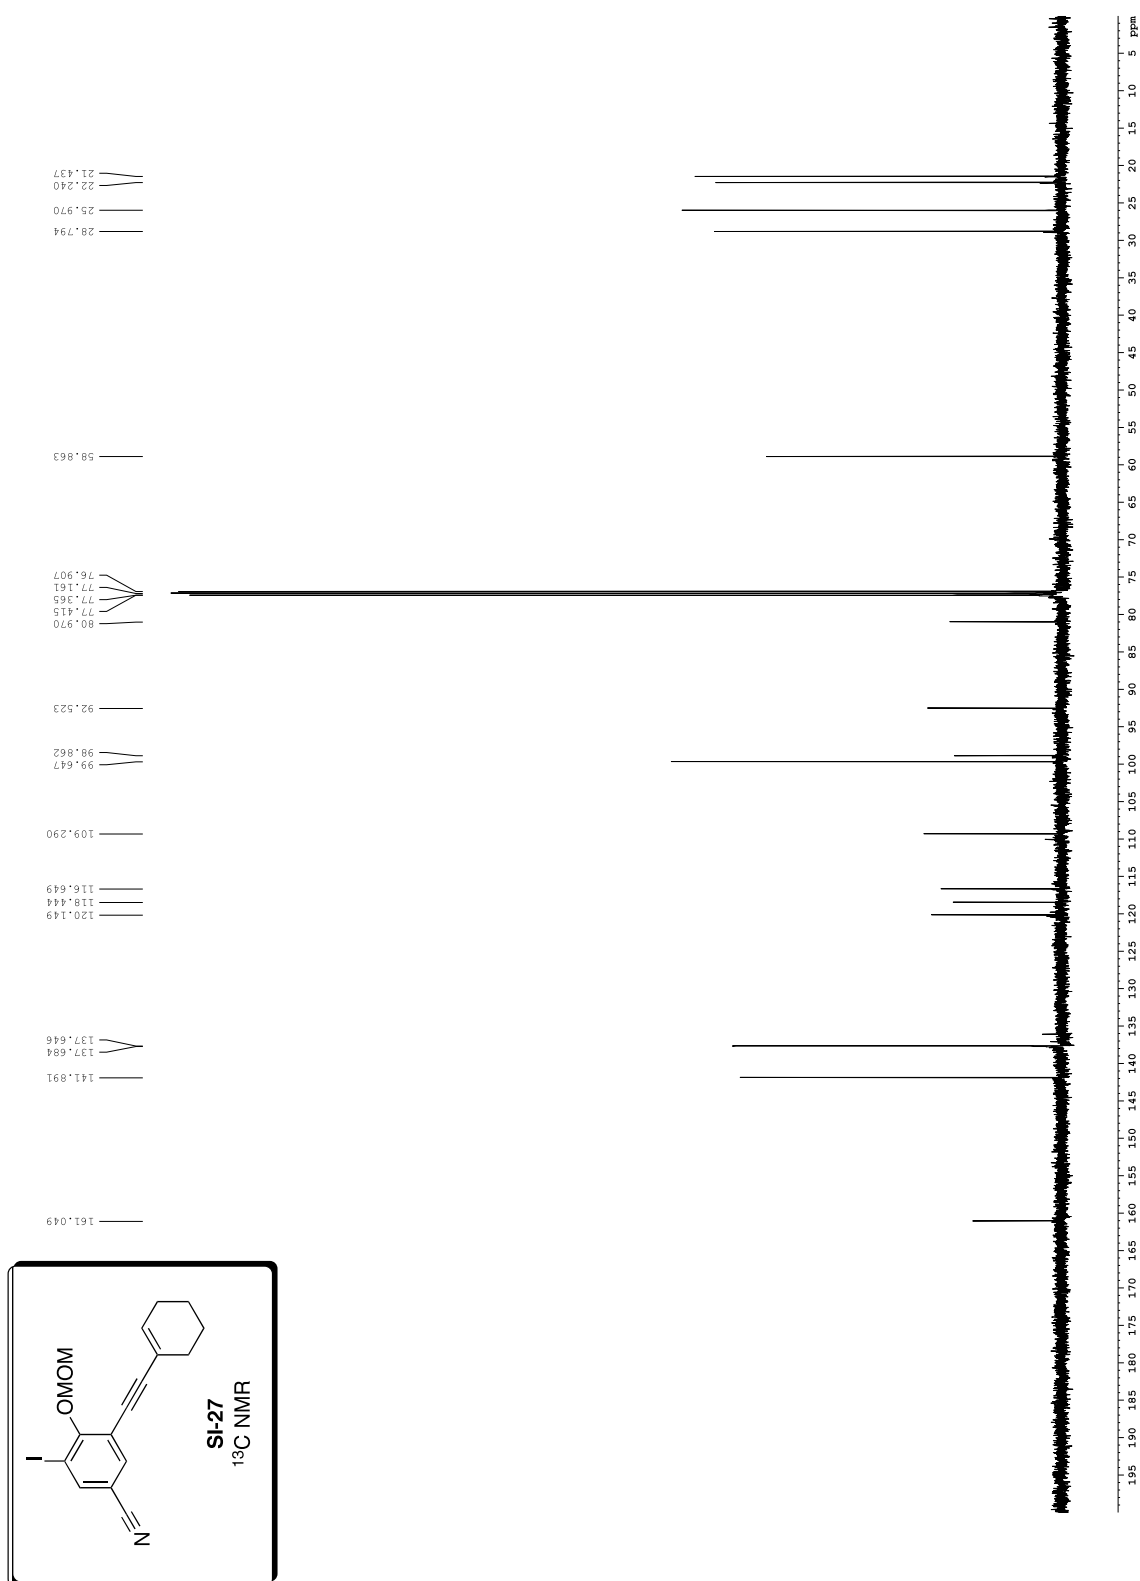

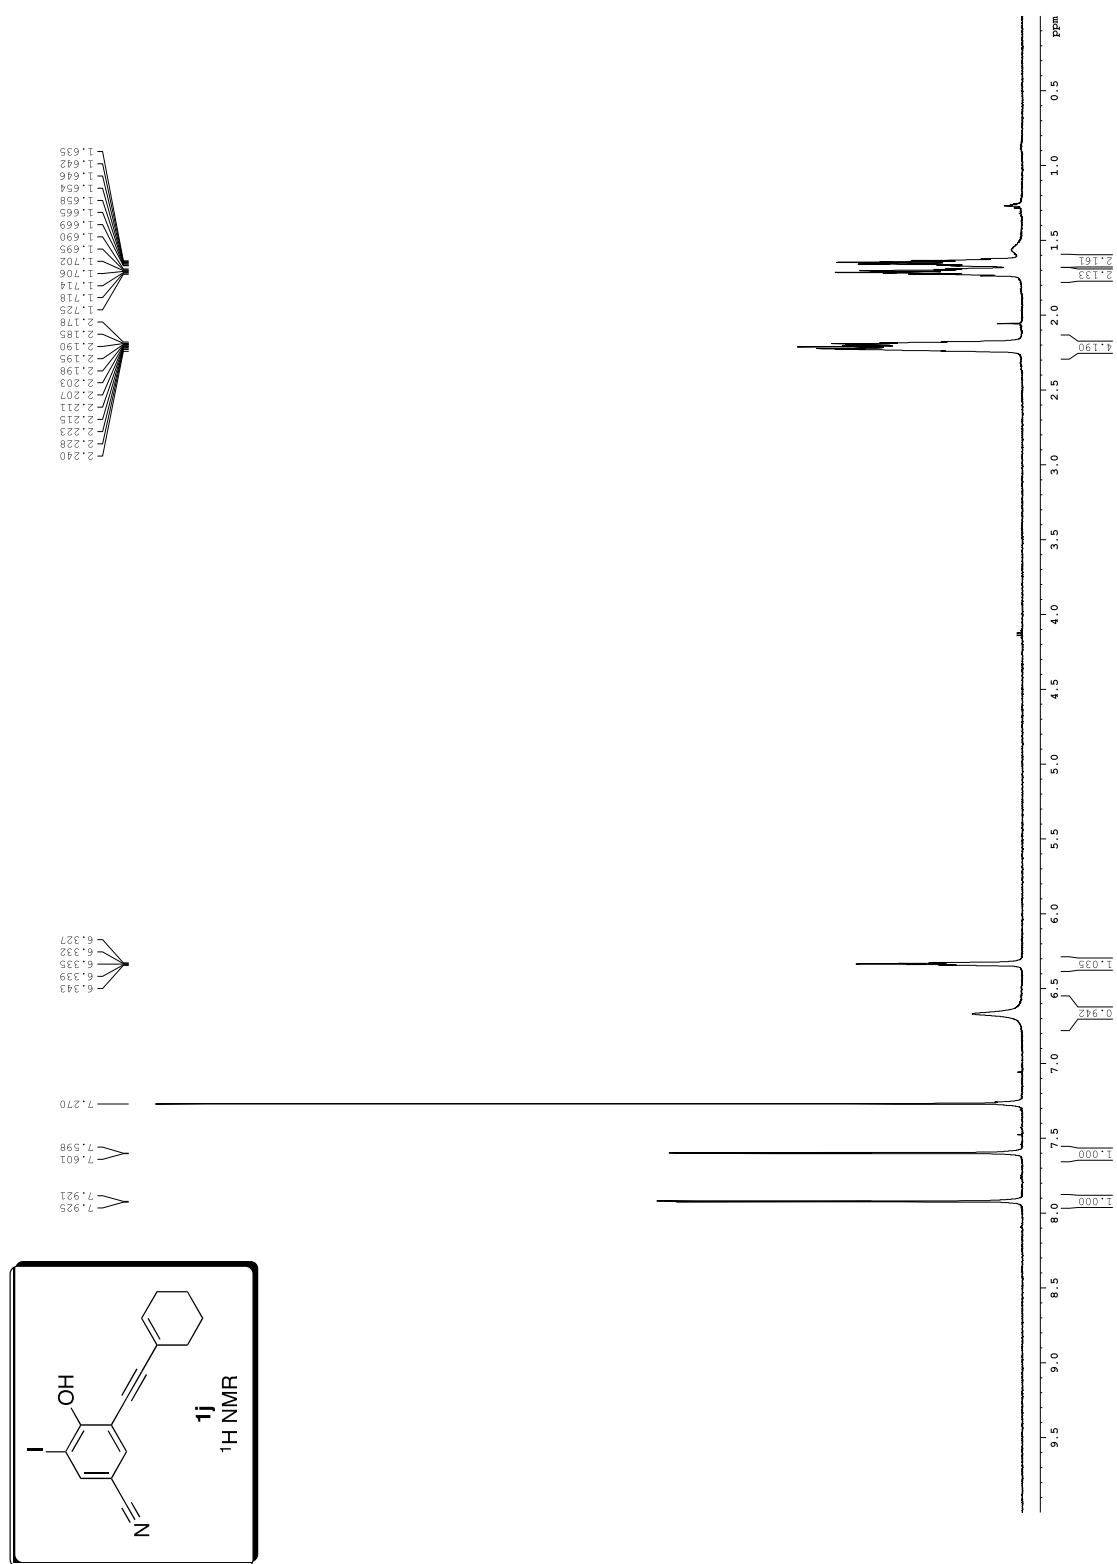

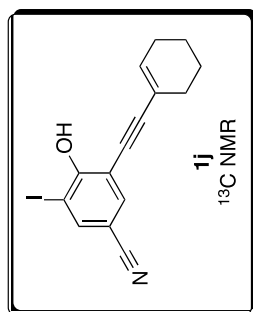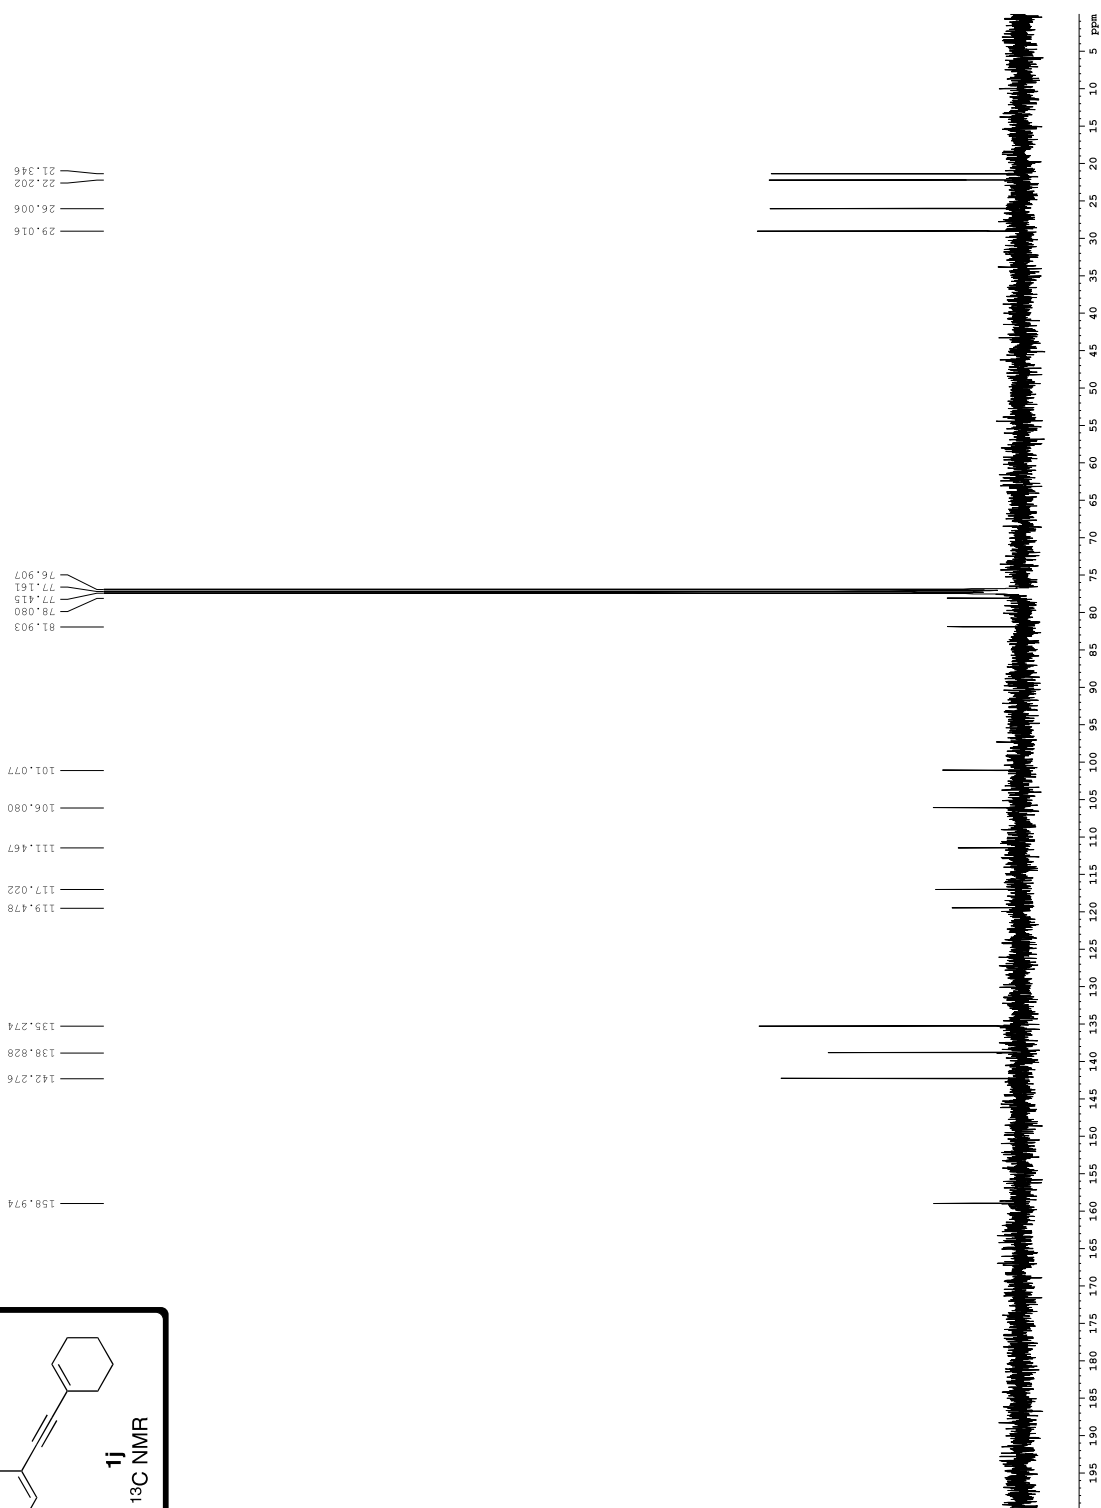

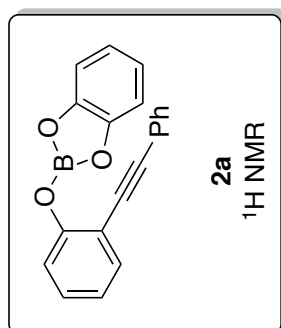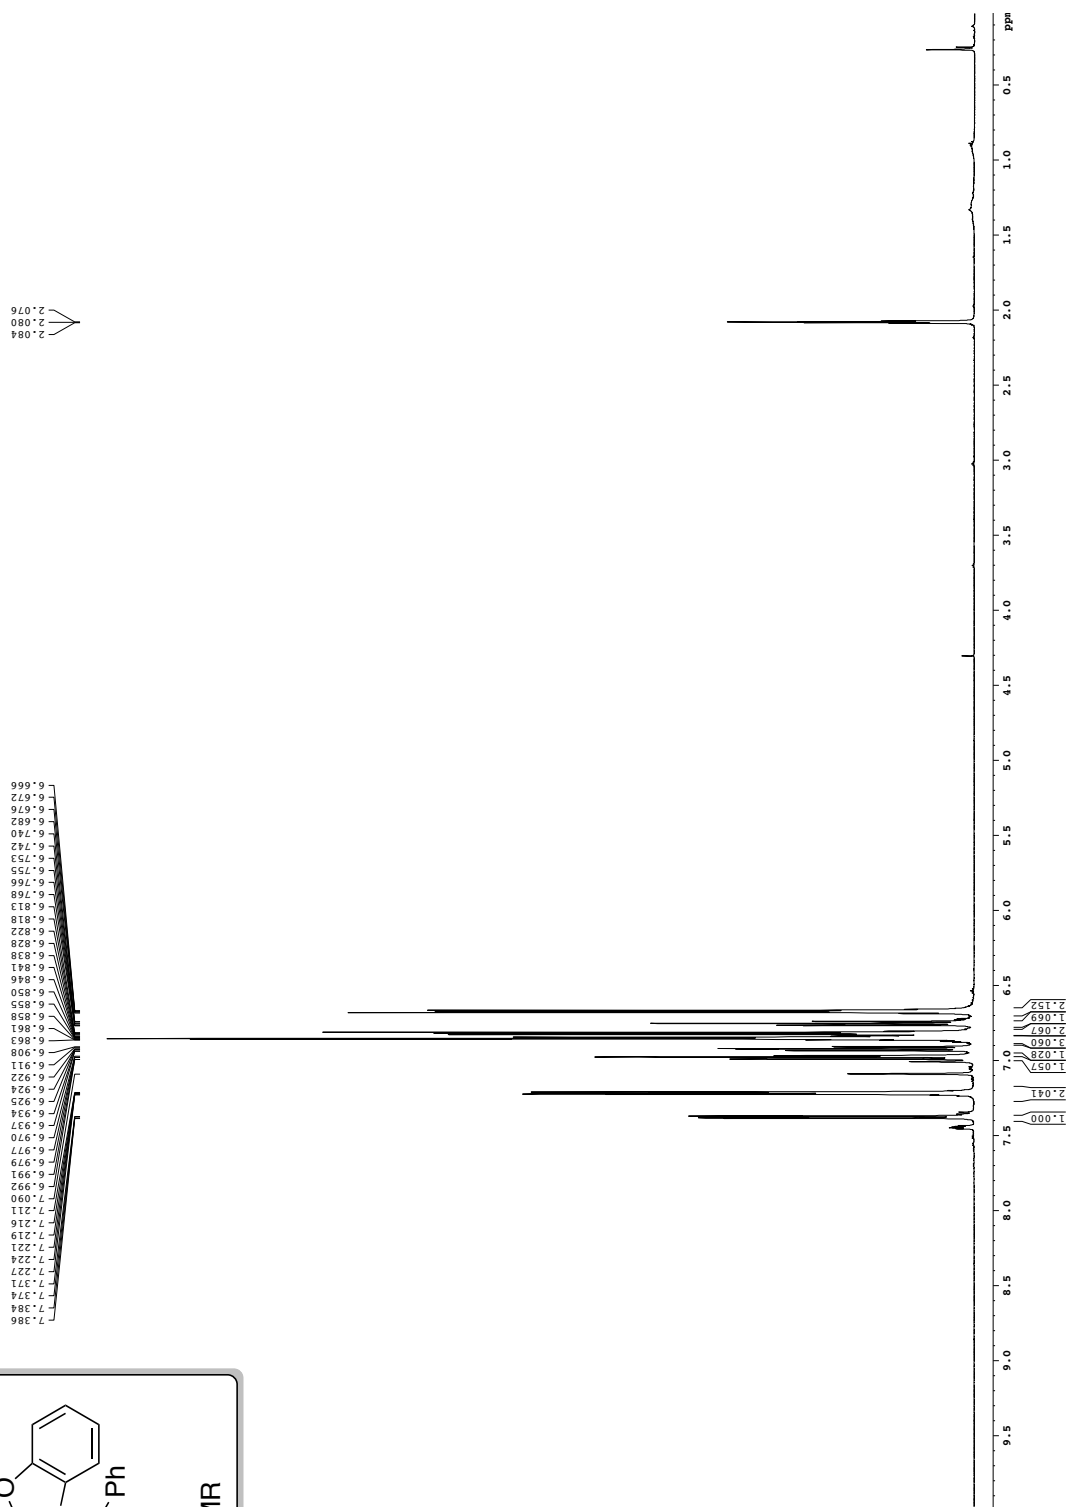



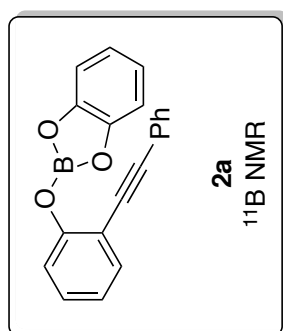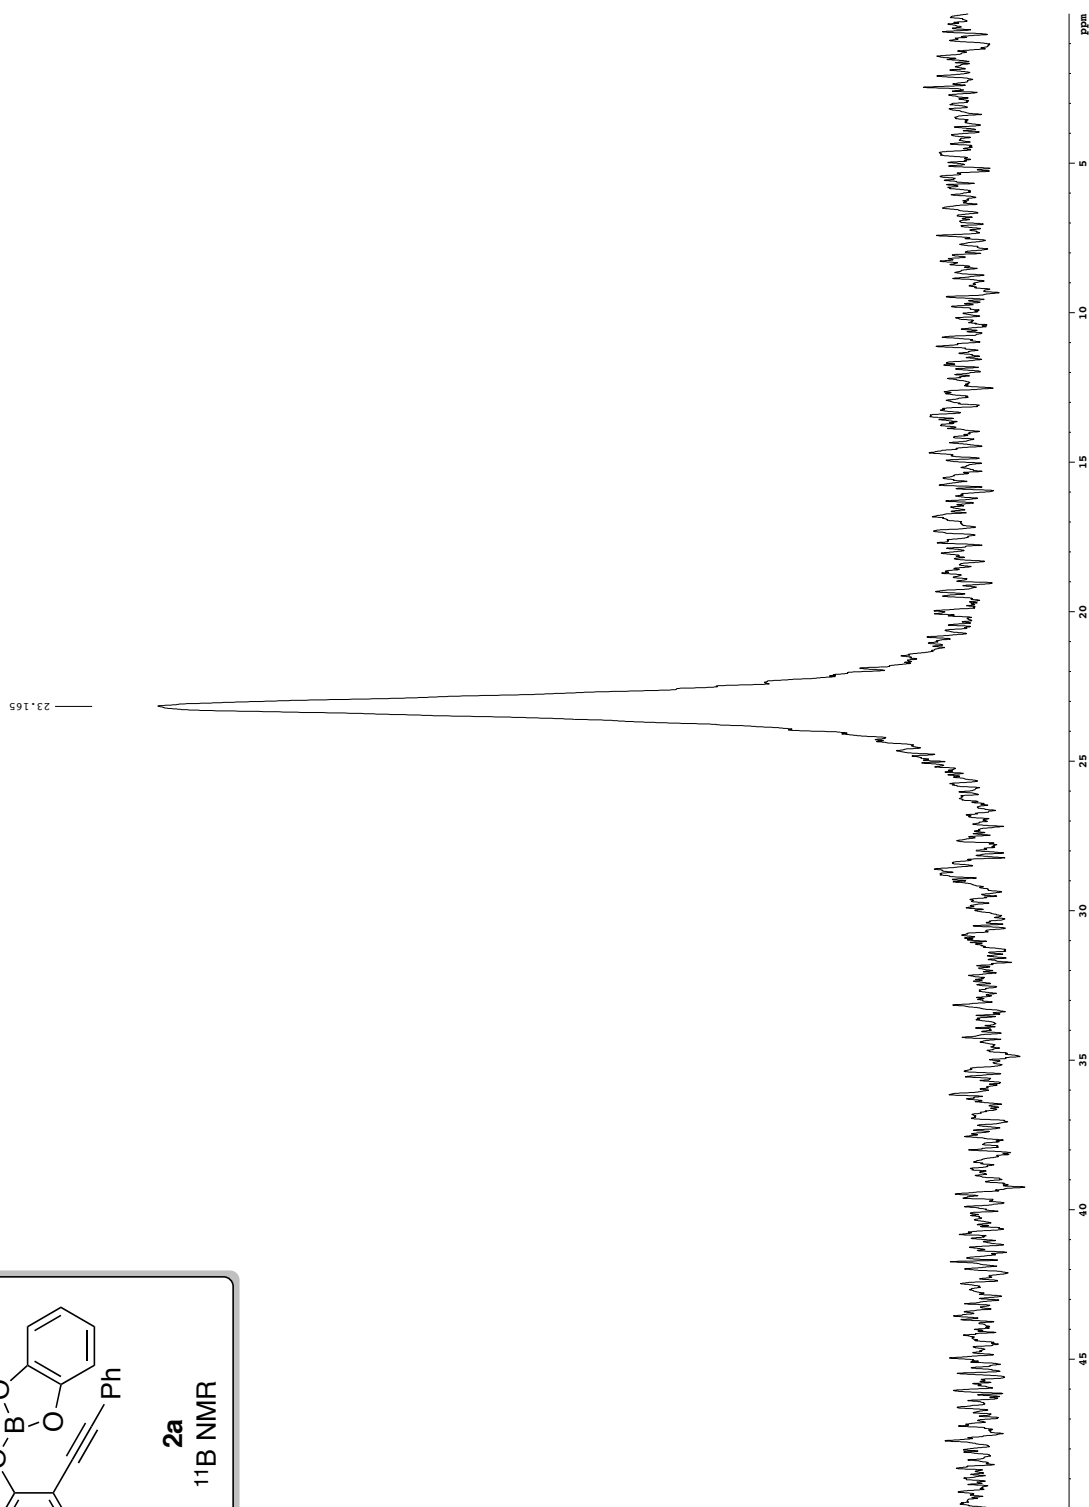



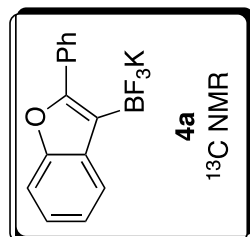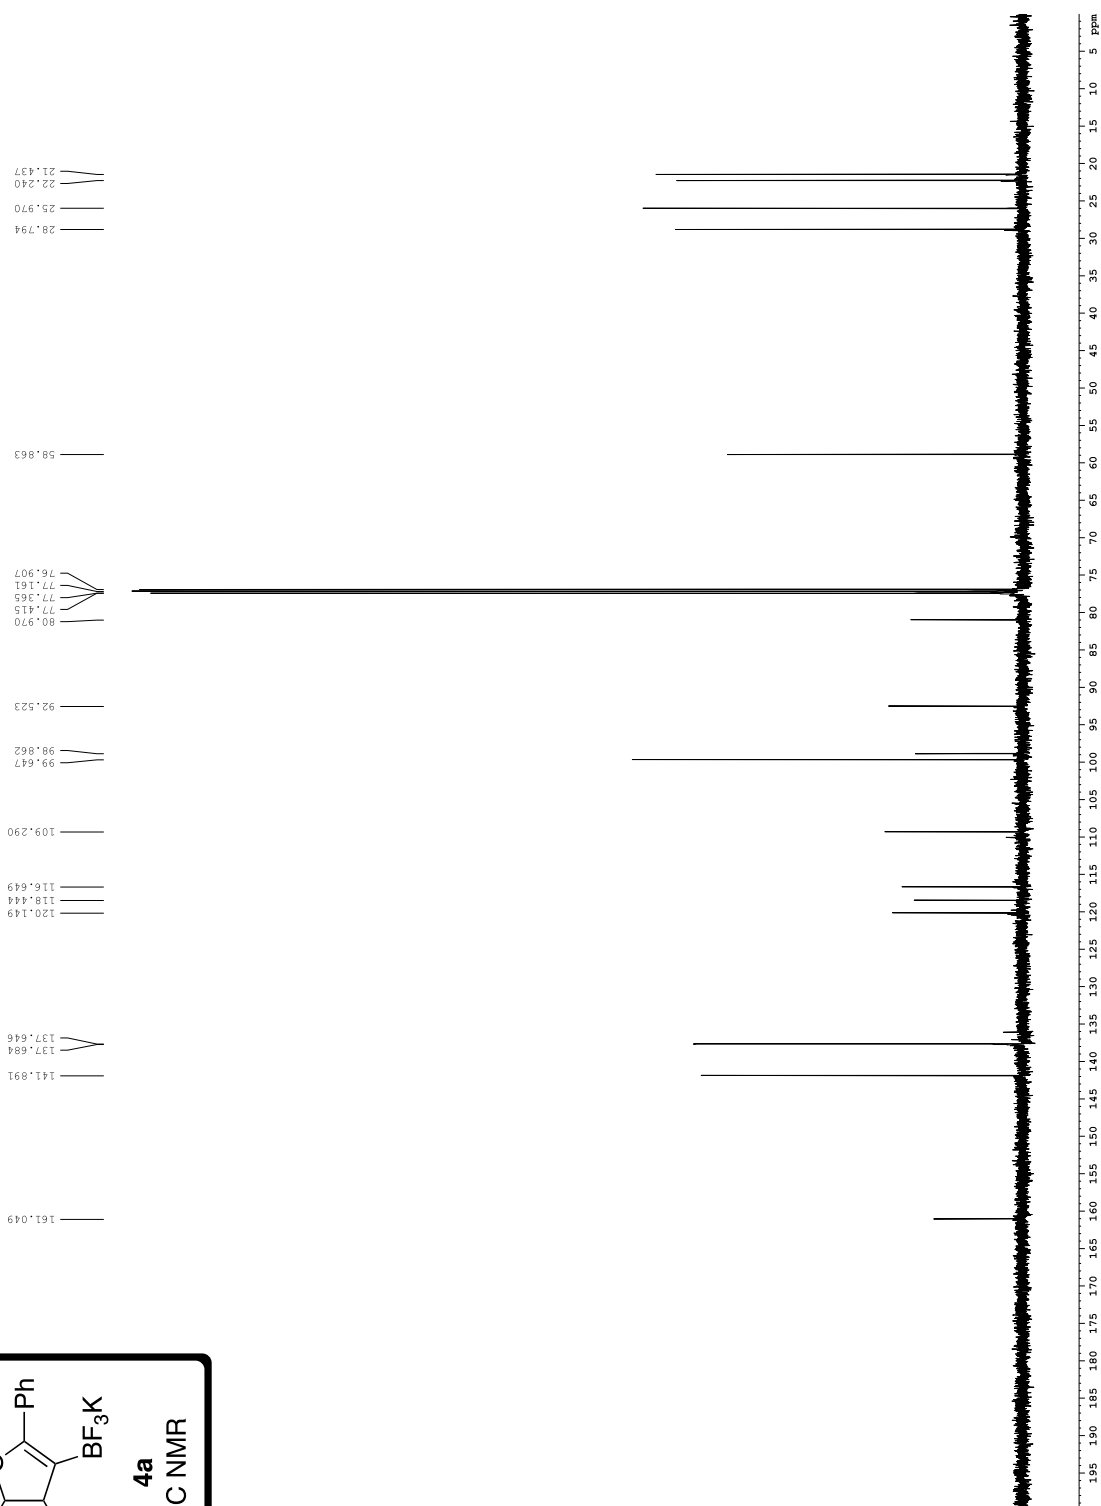

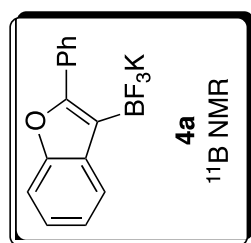

3.264

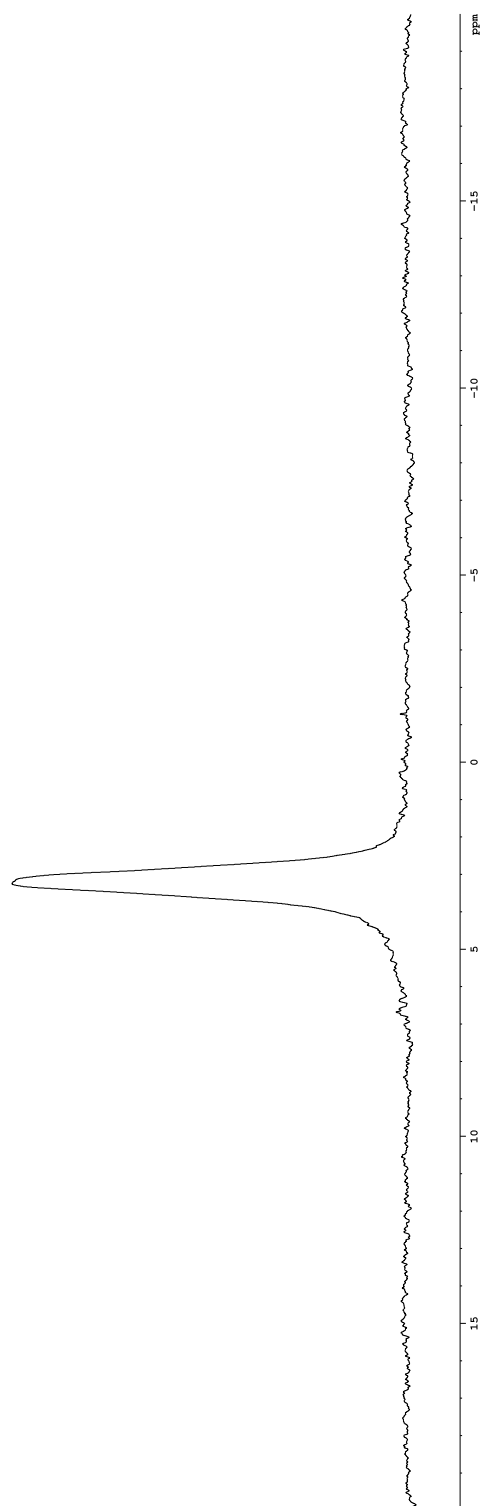

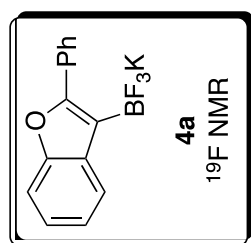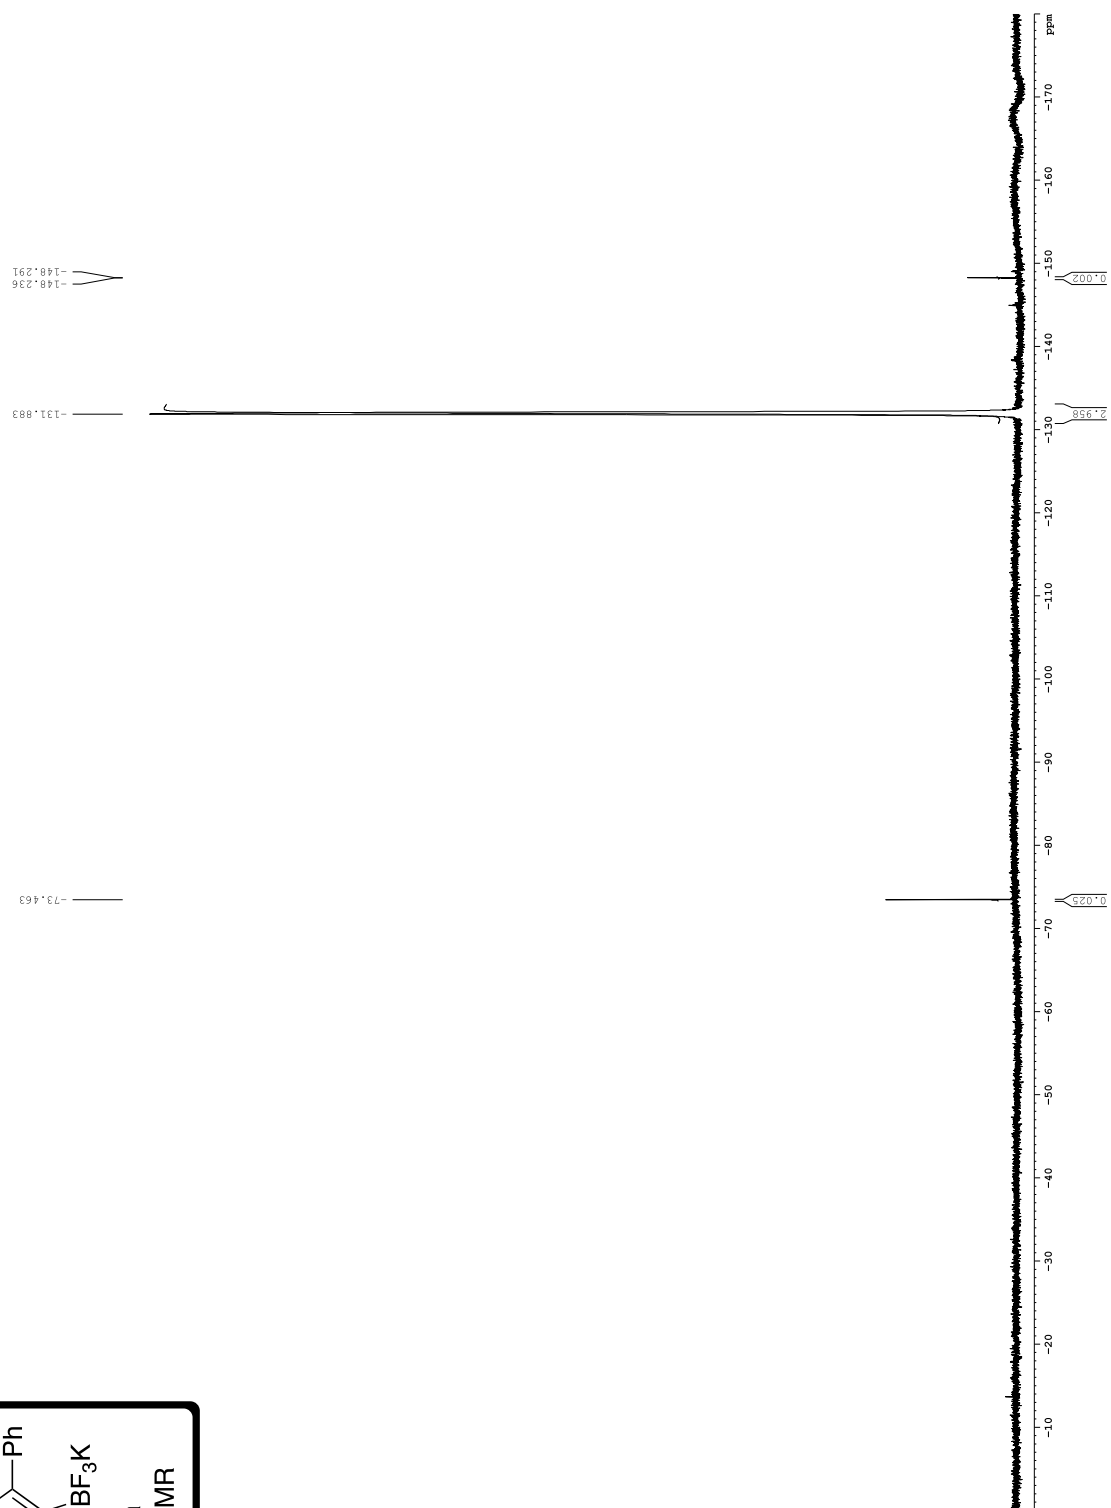

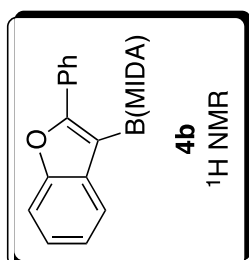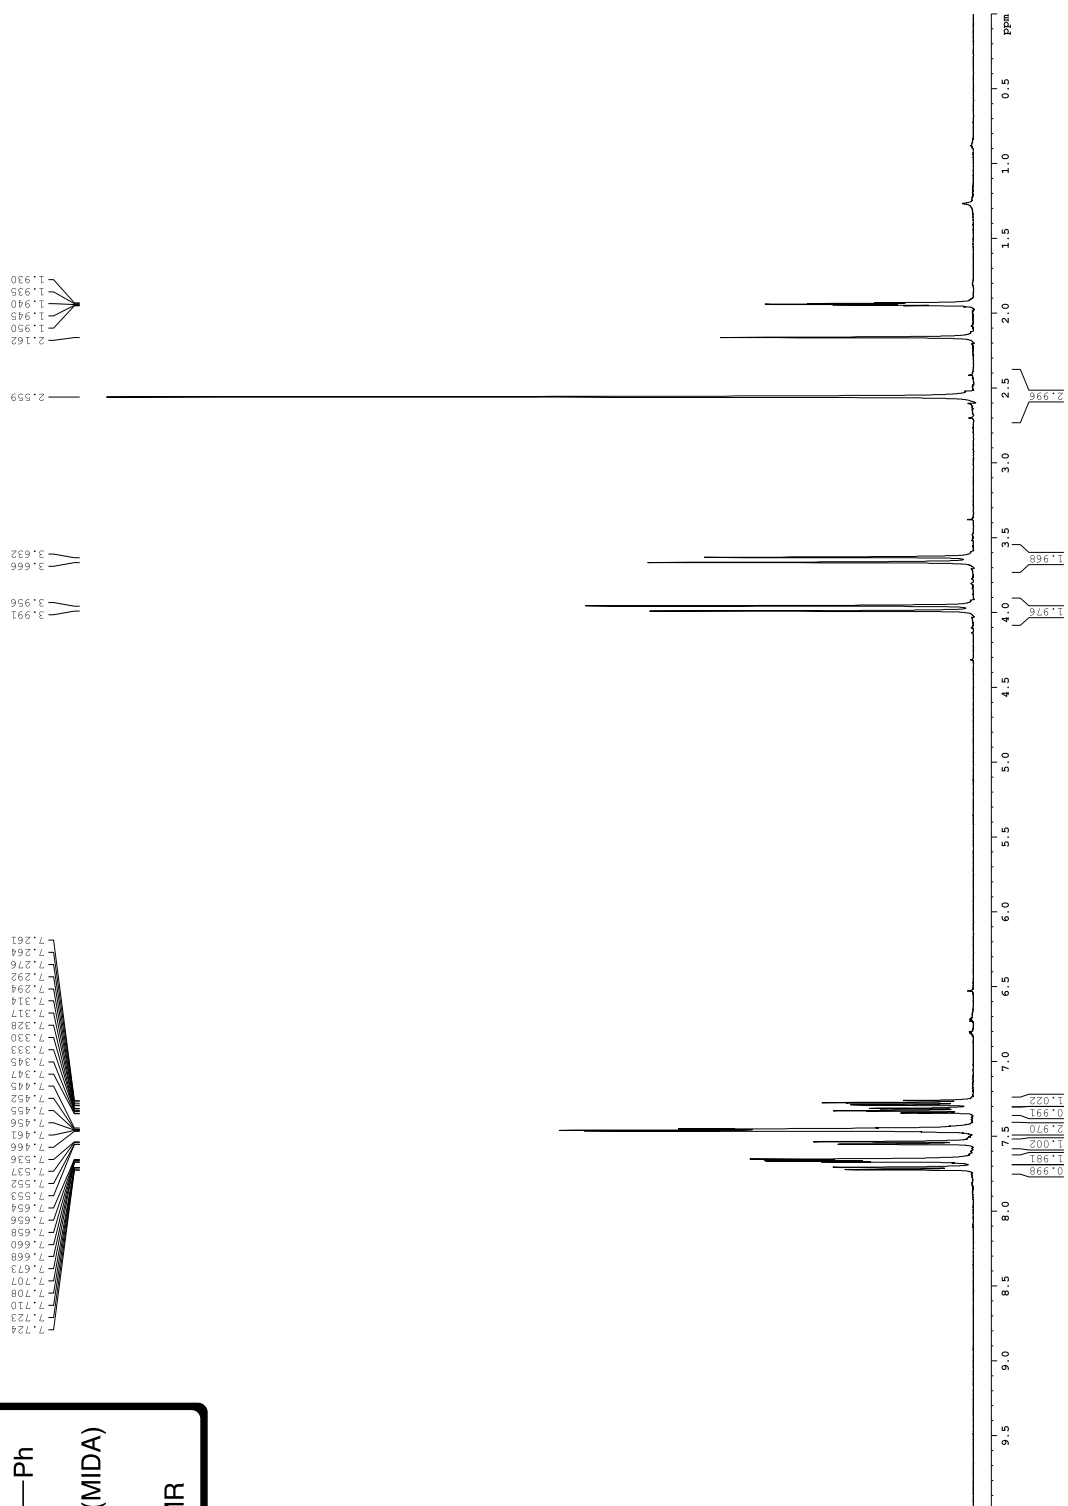

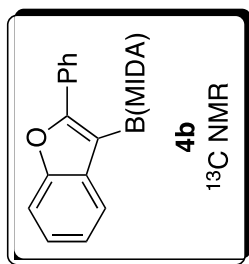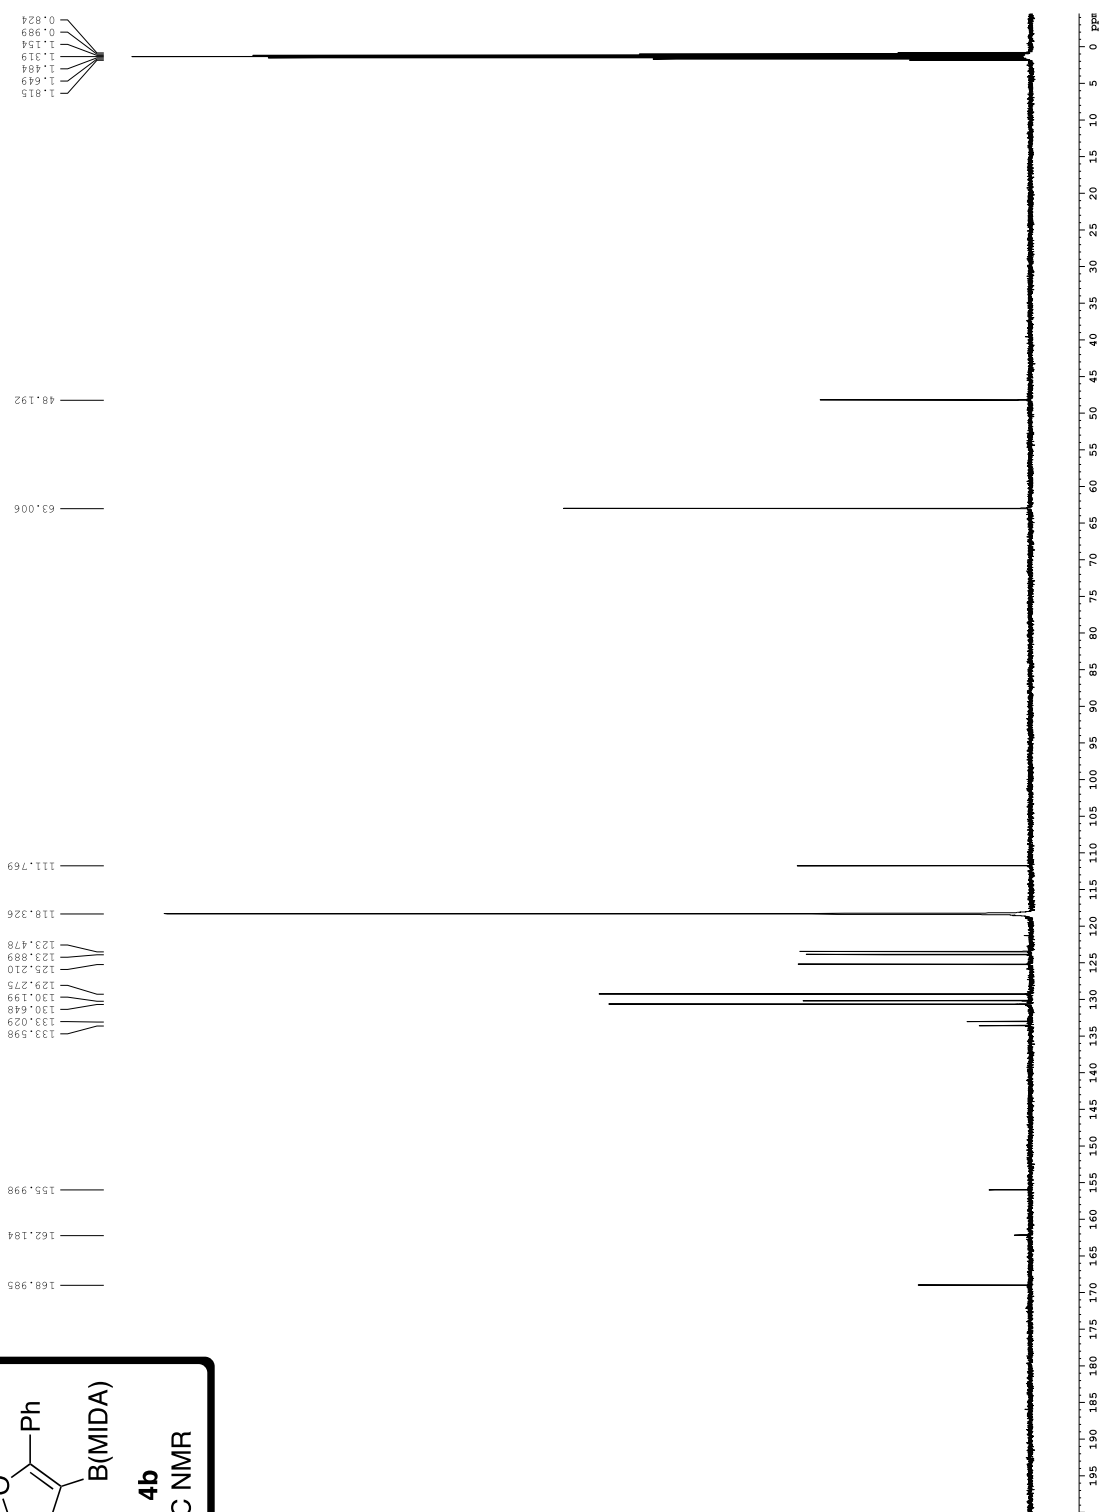

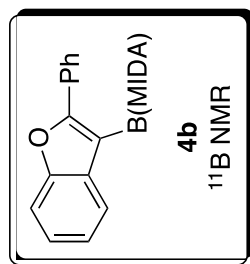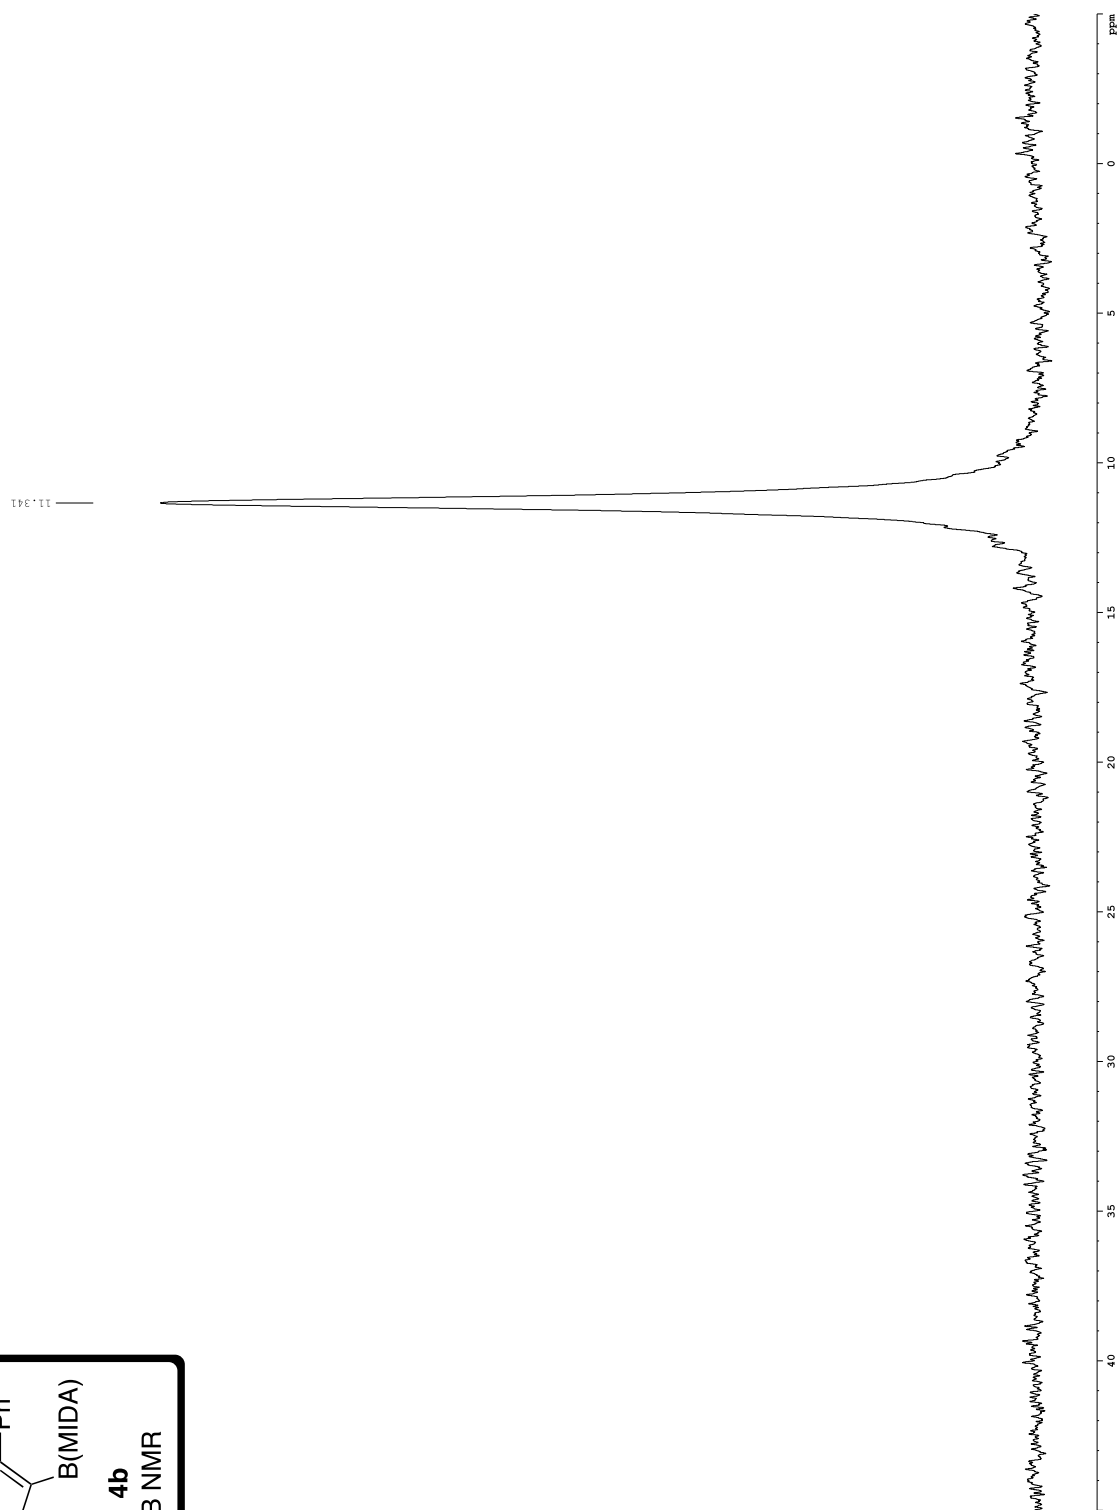



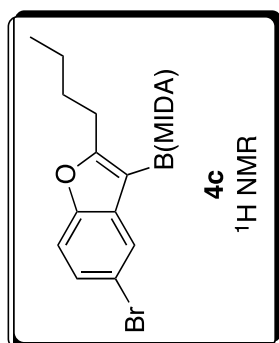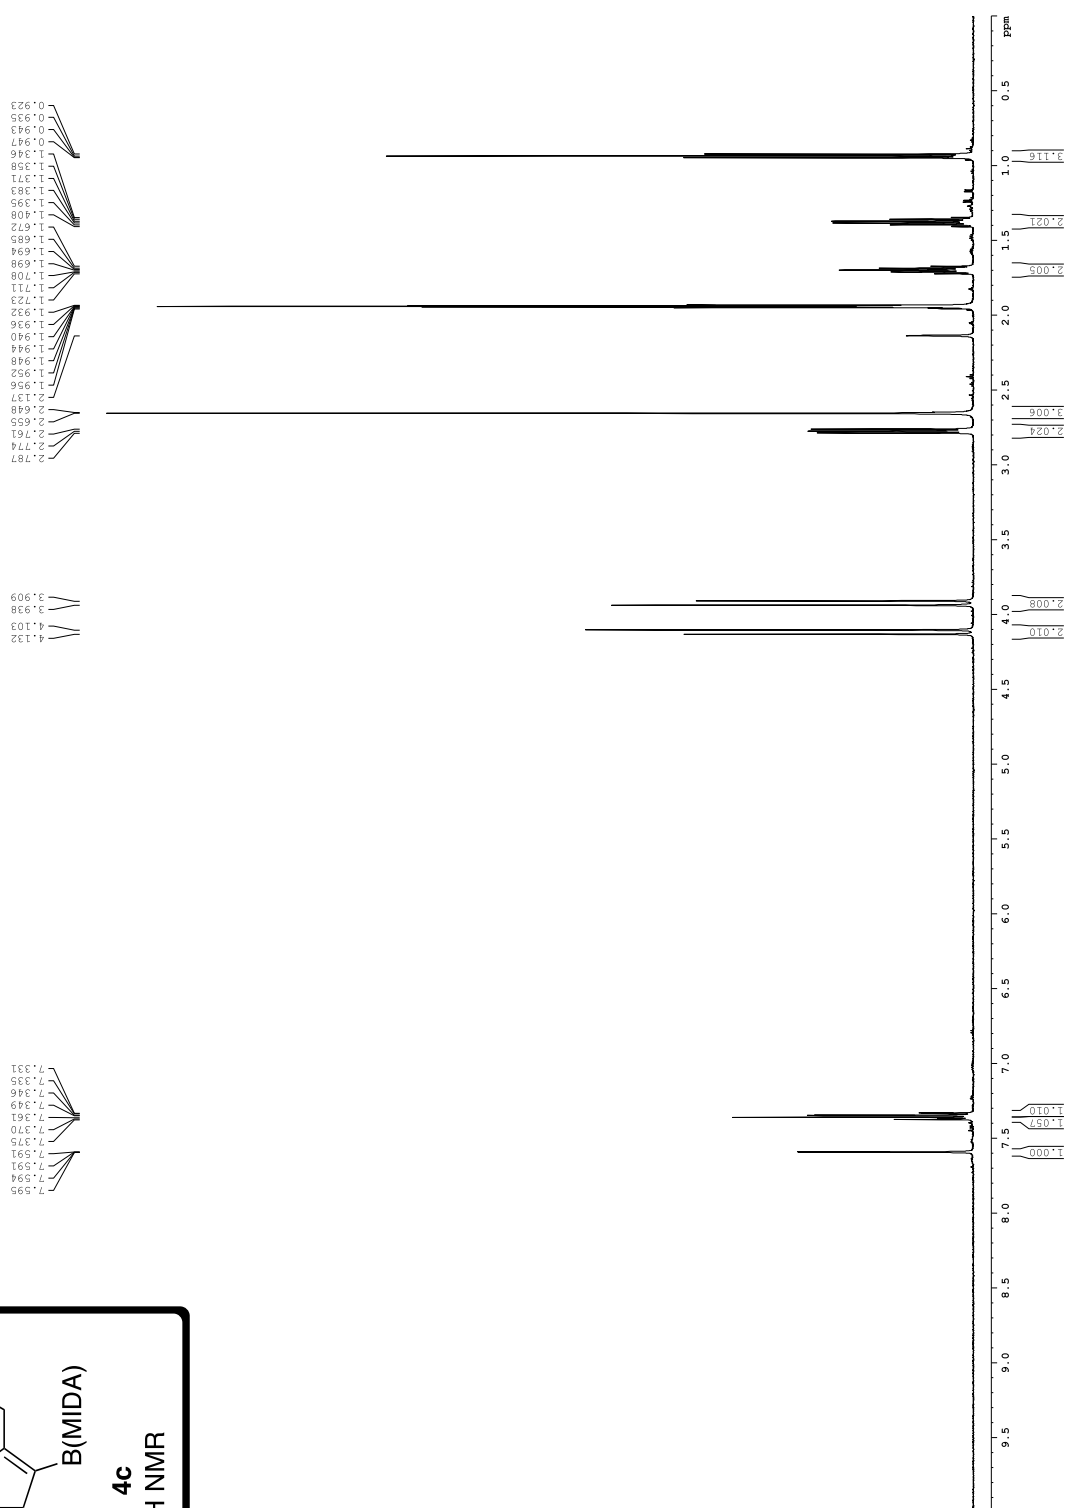

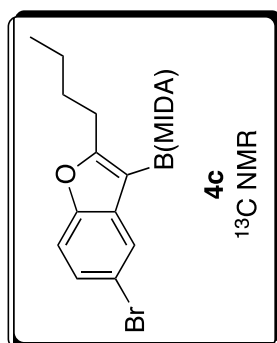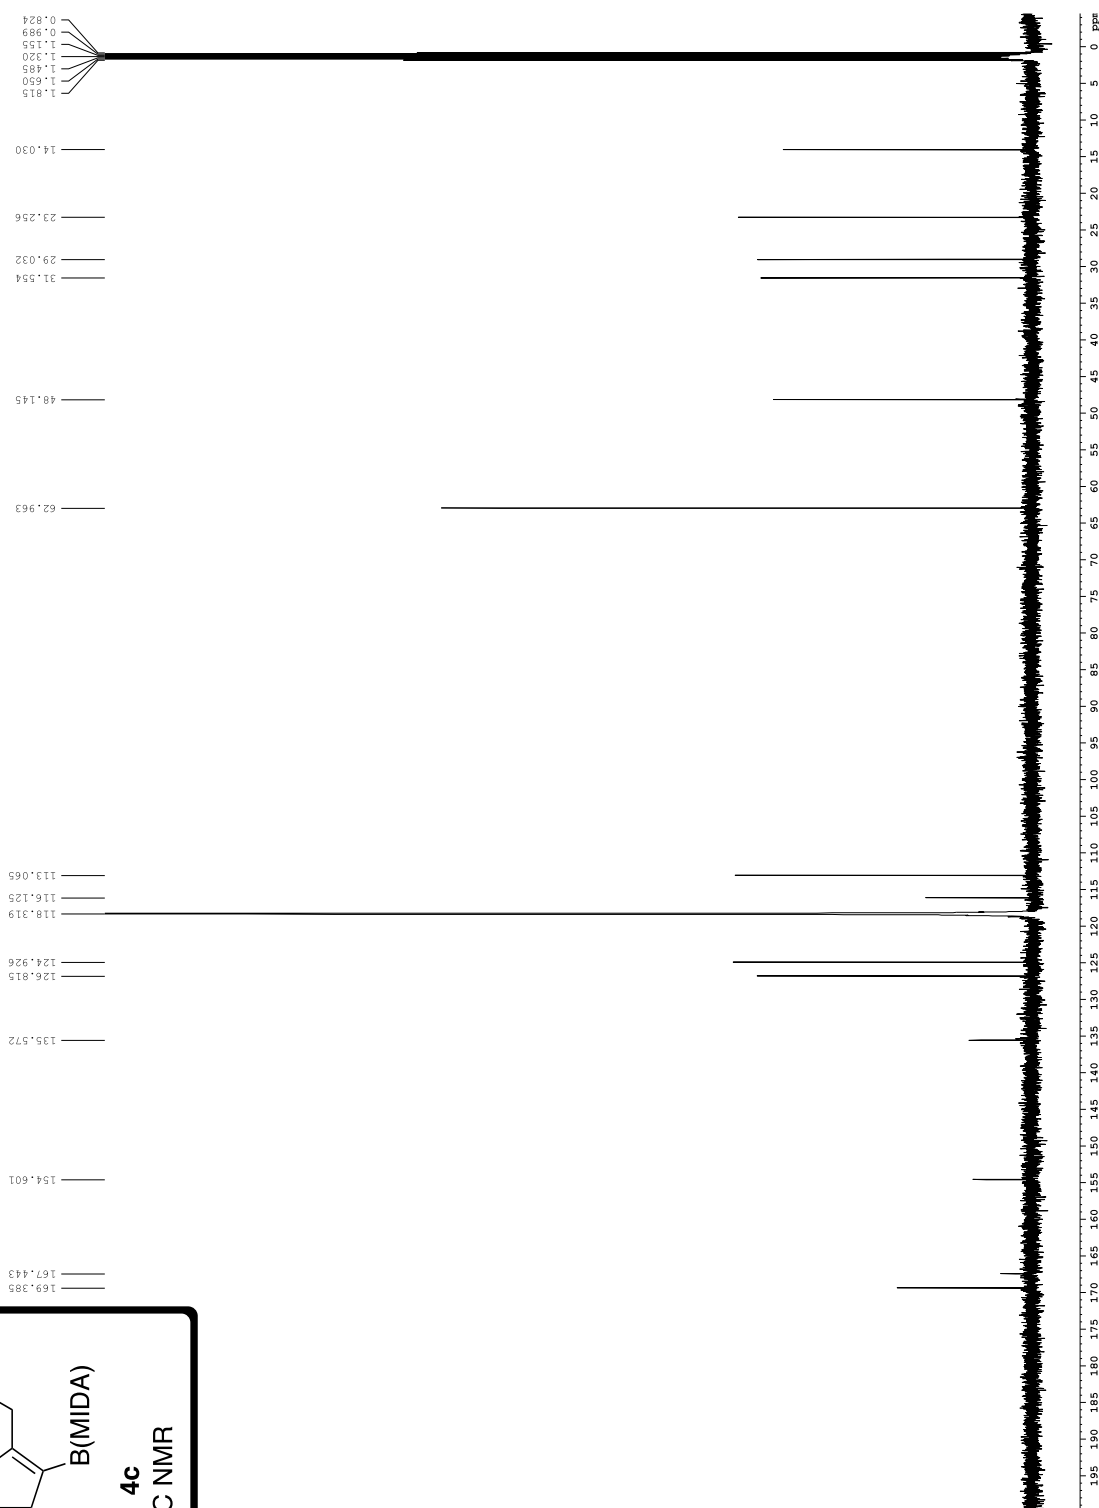

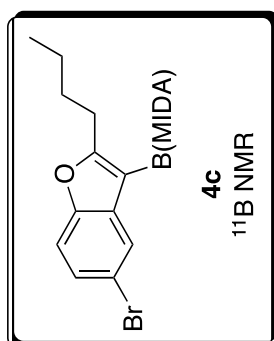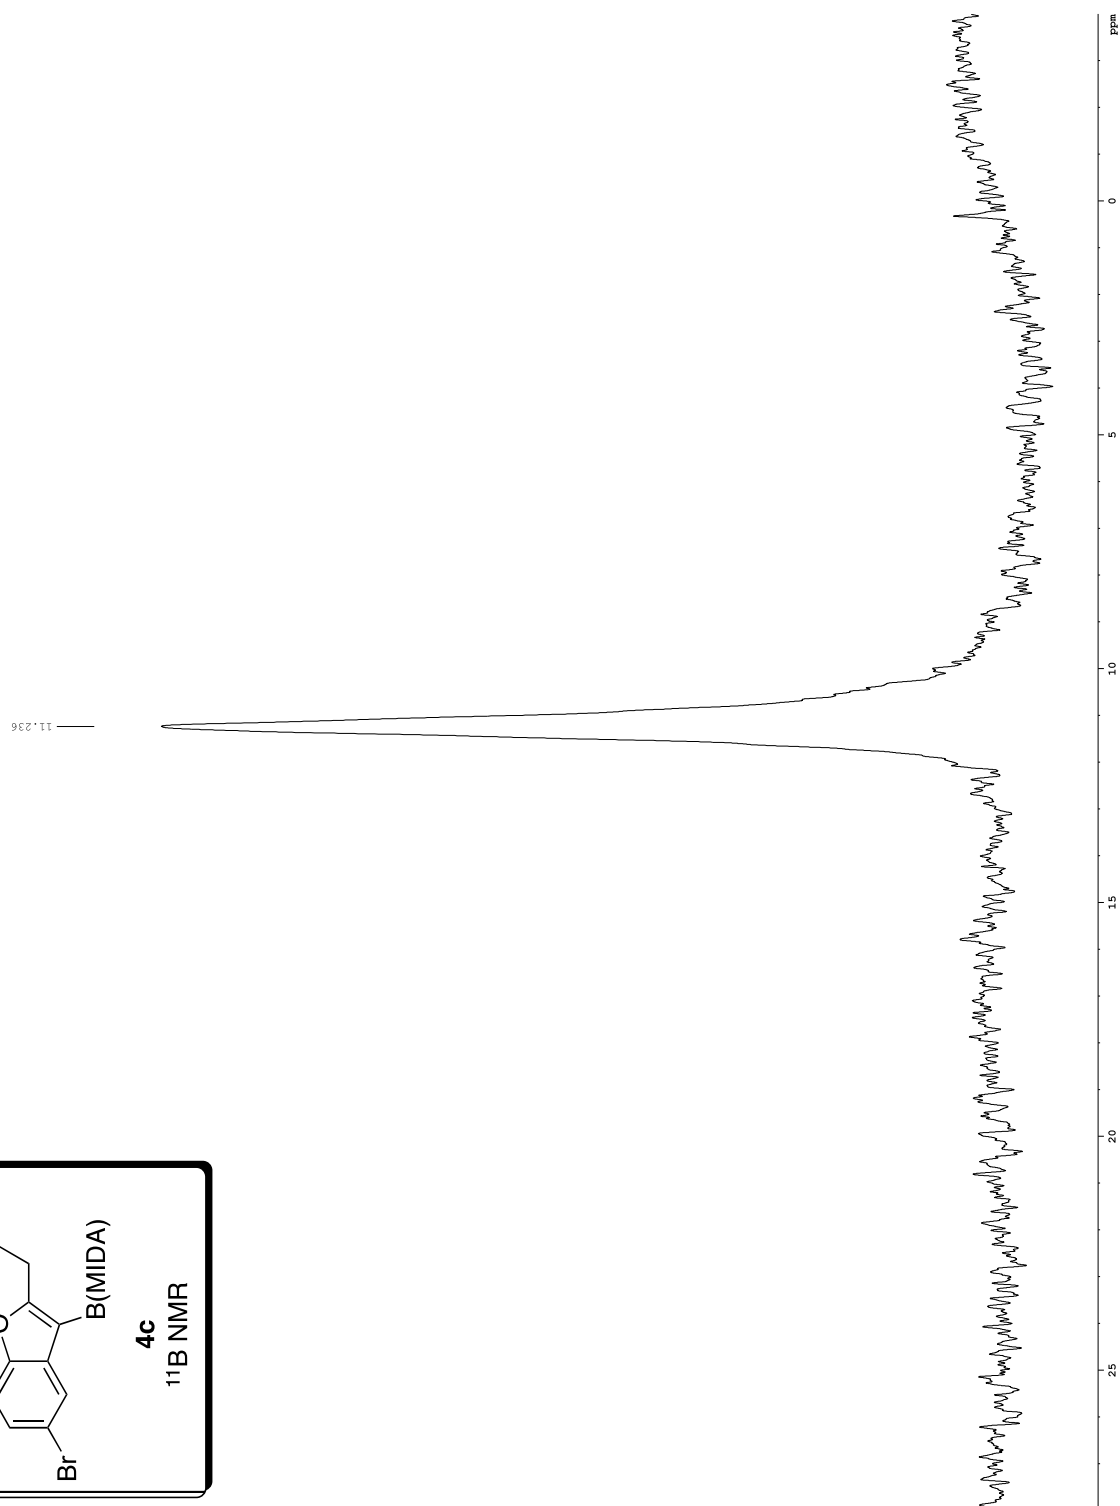

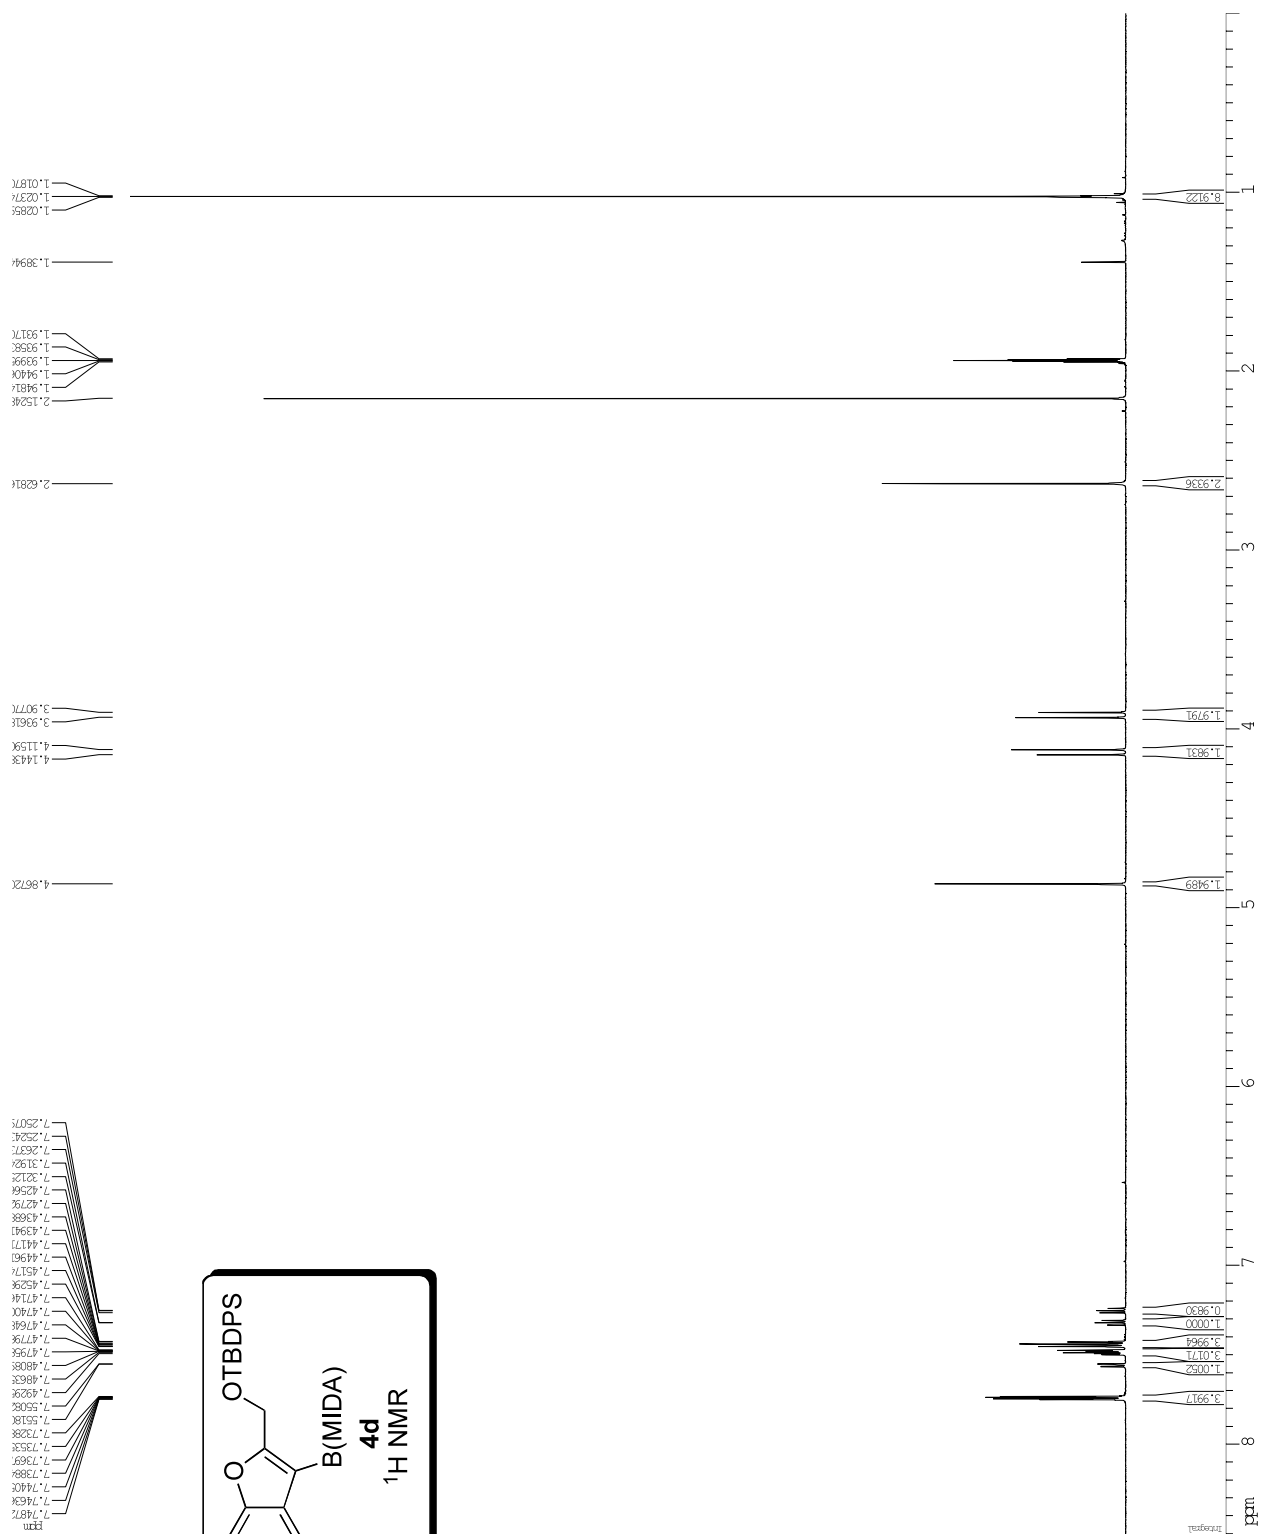

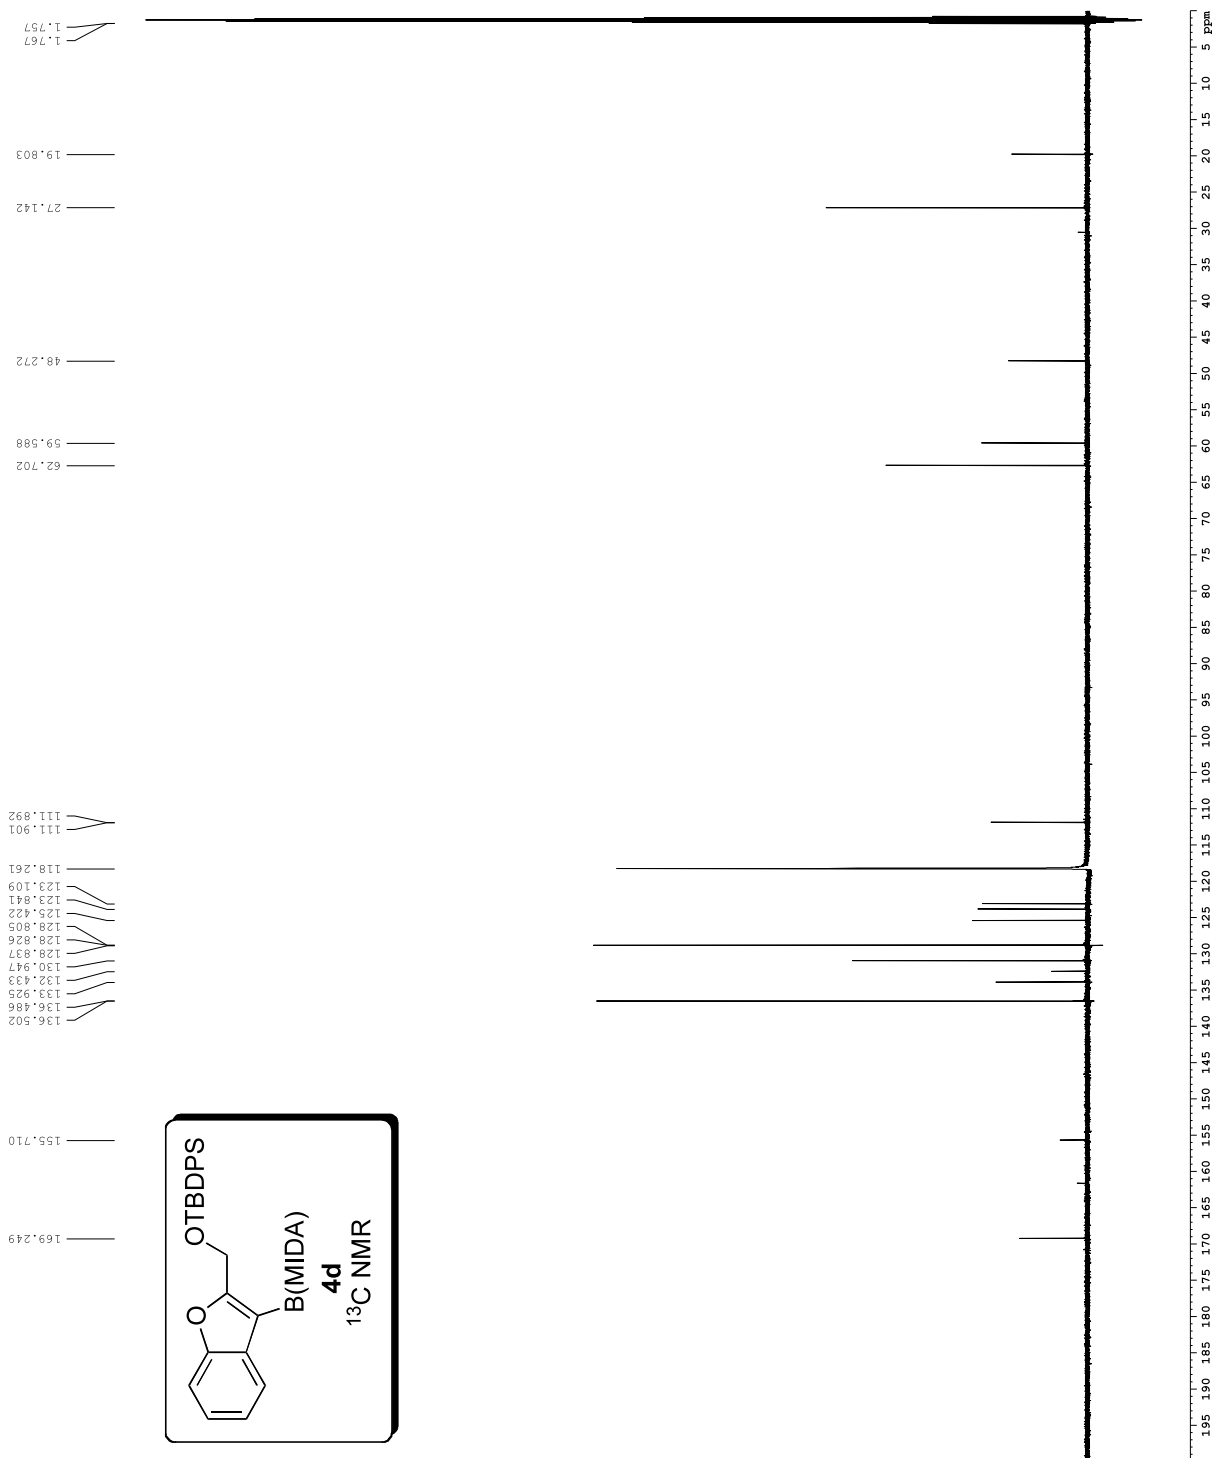

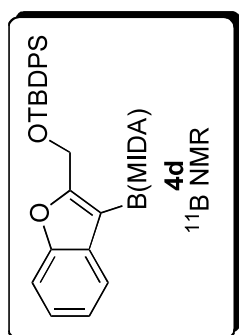

11.132

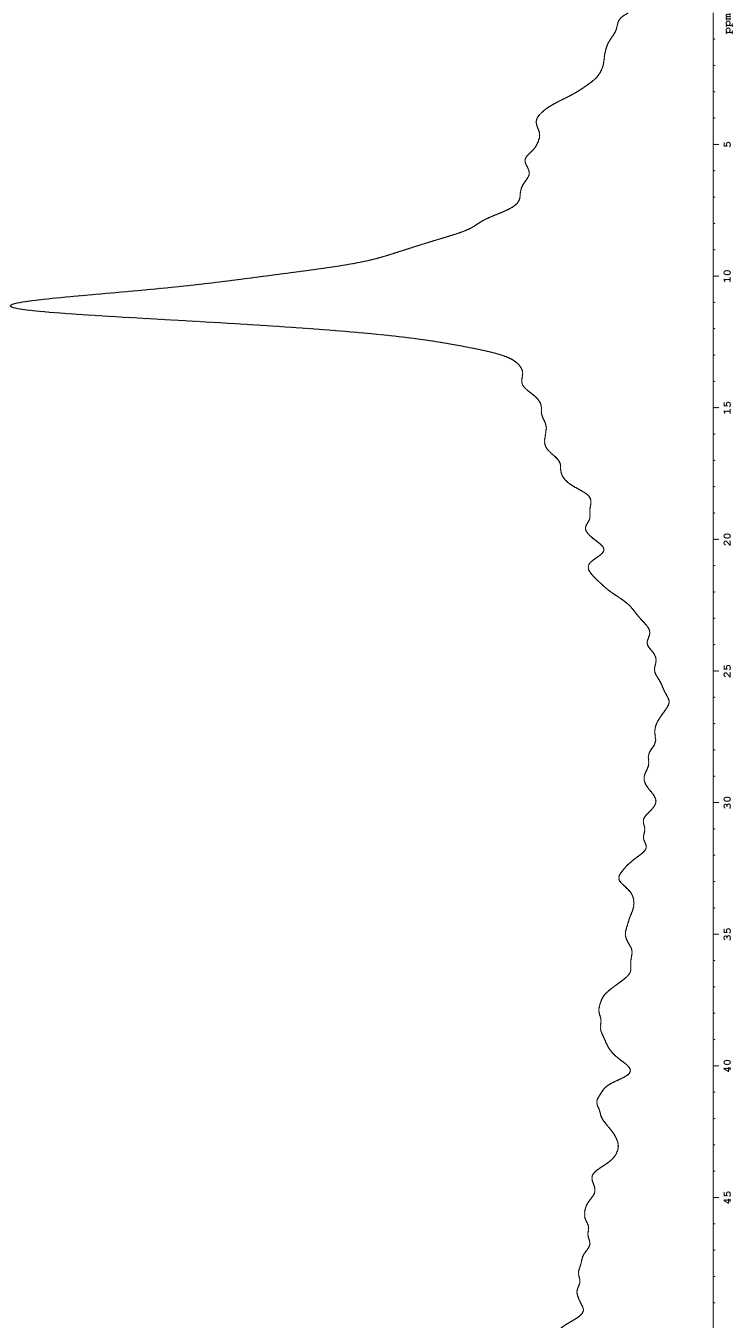

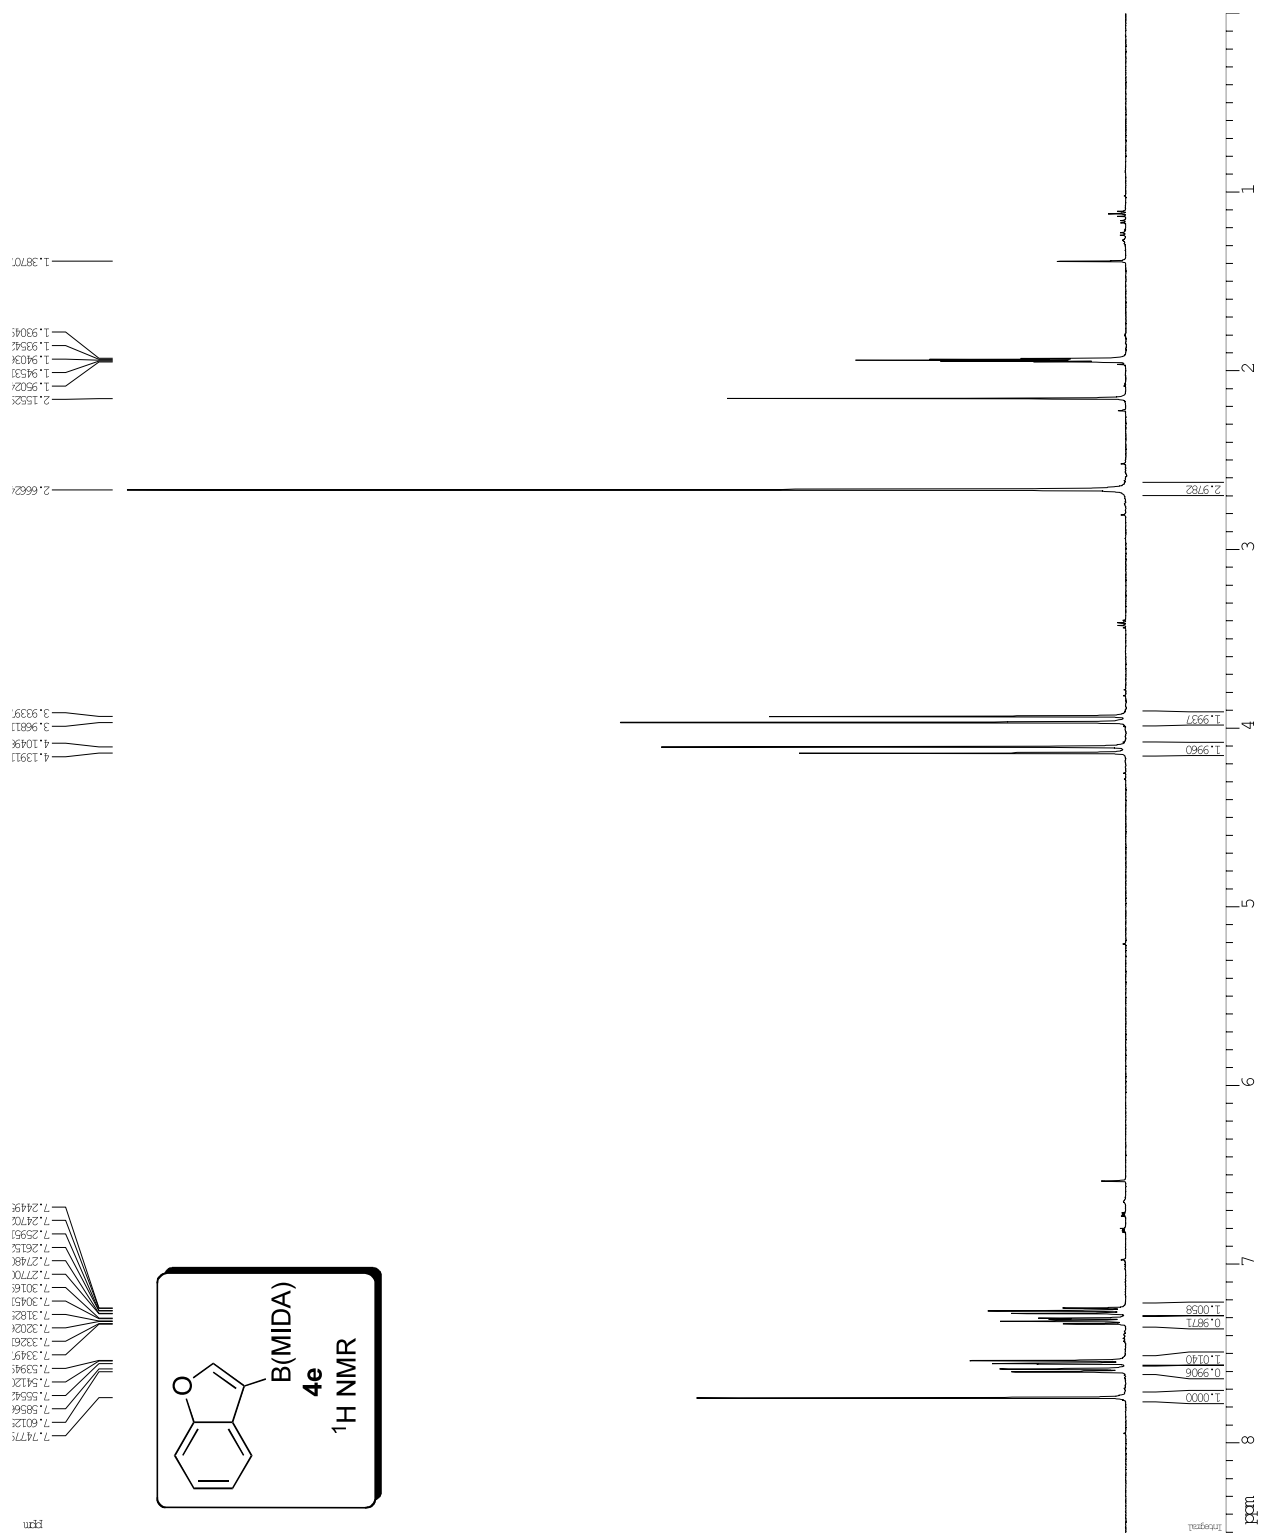

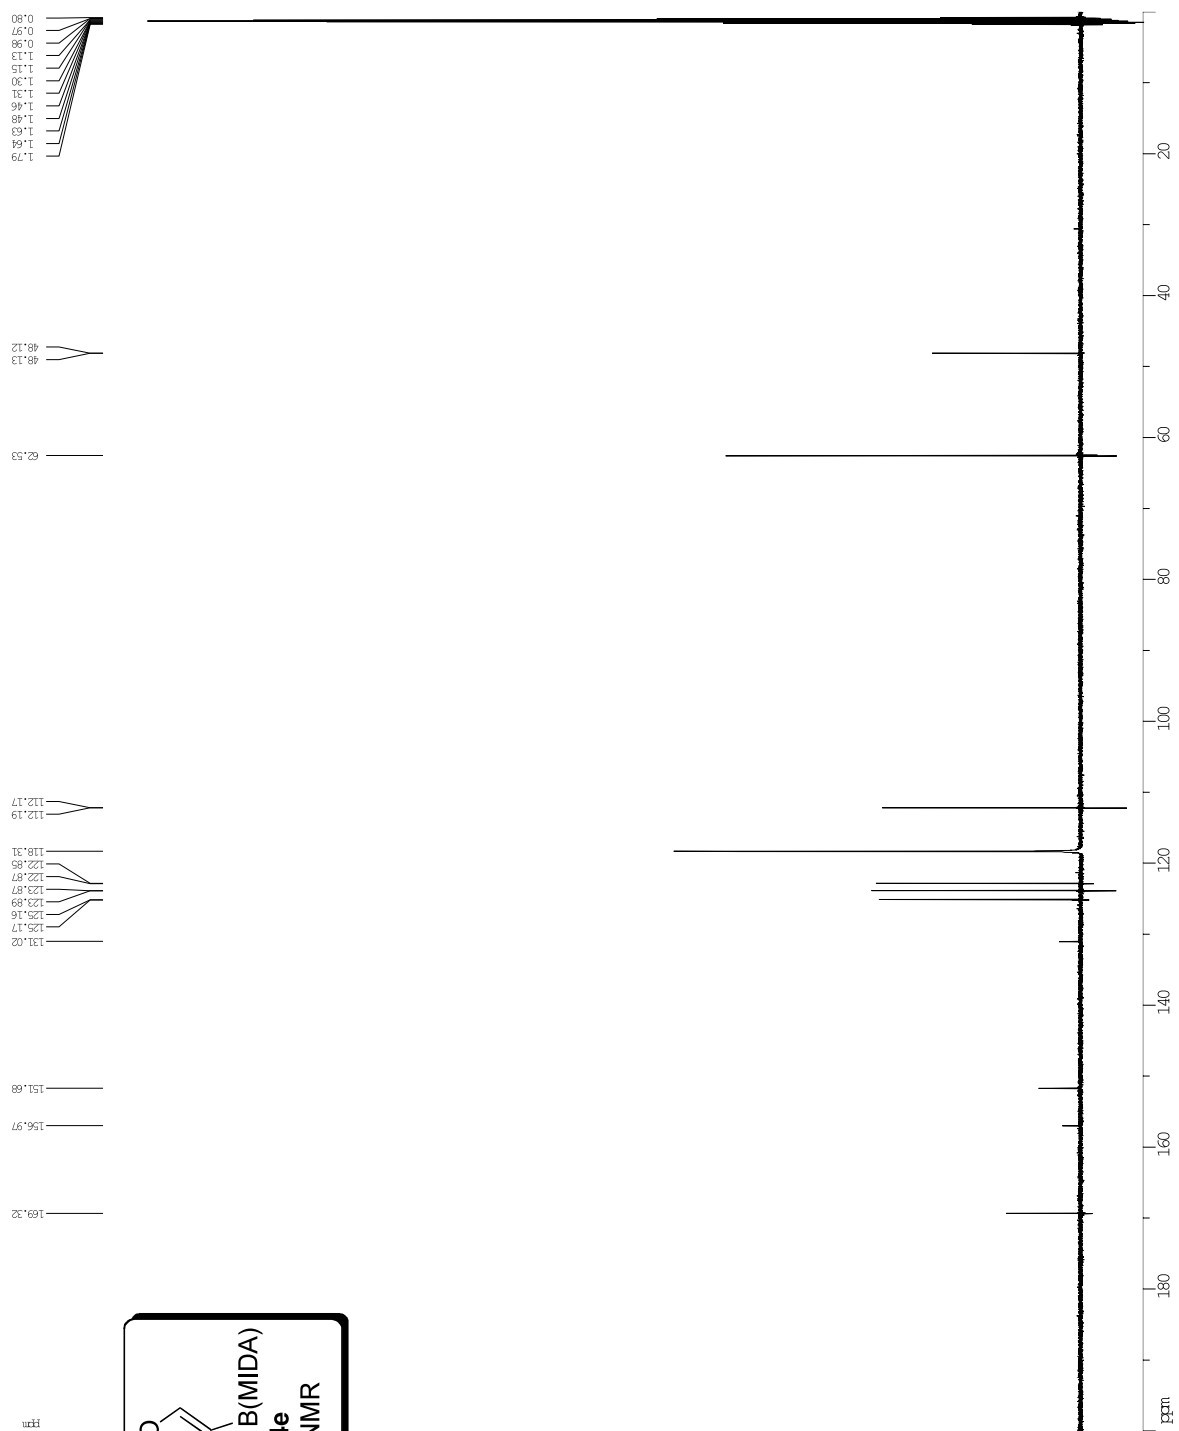



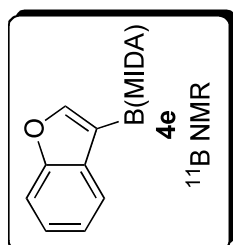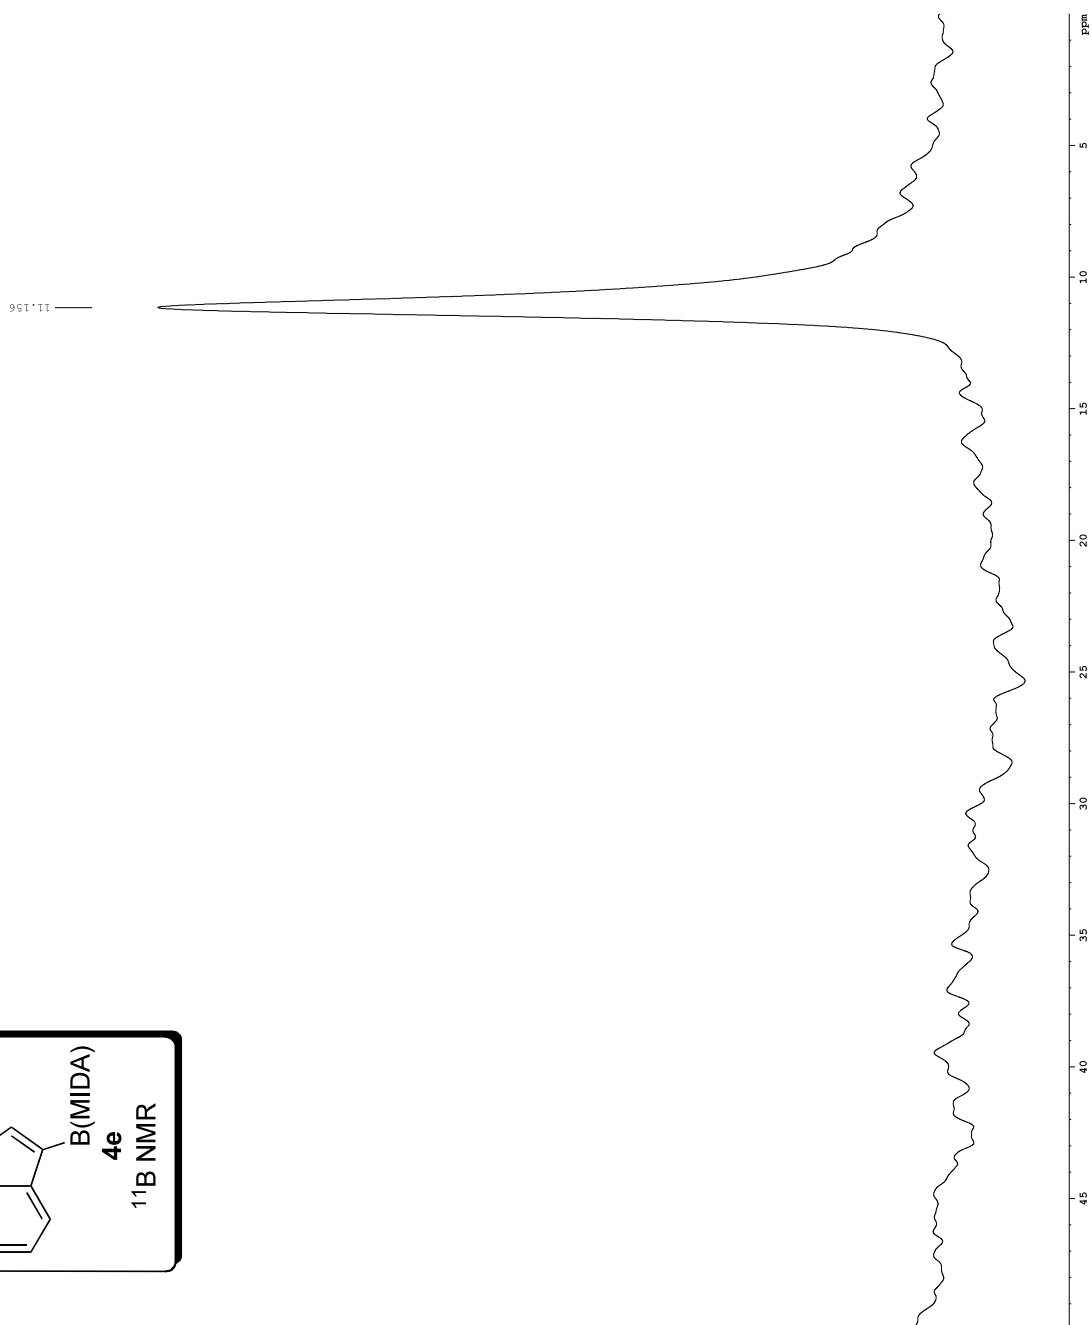

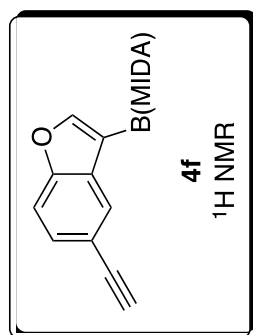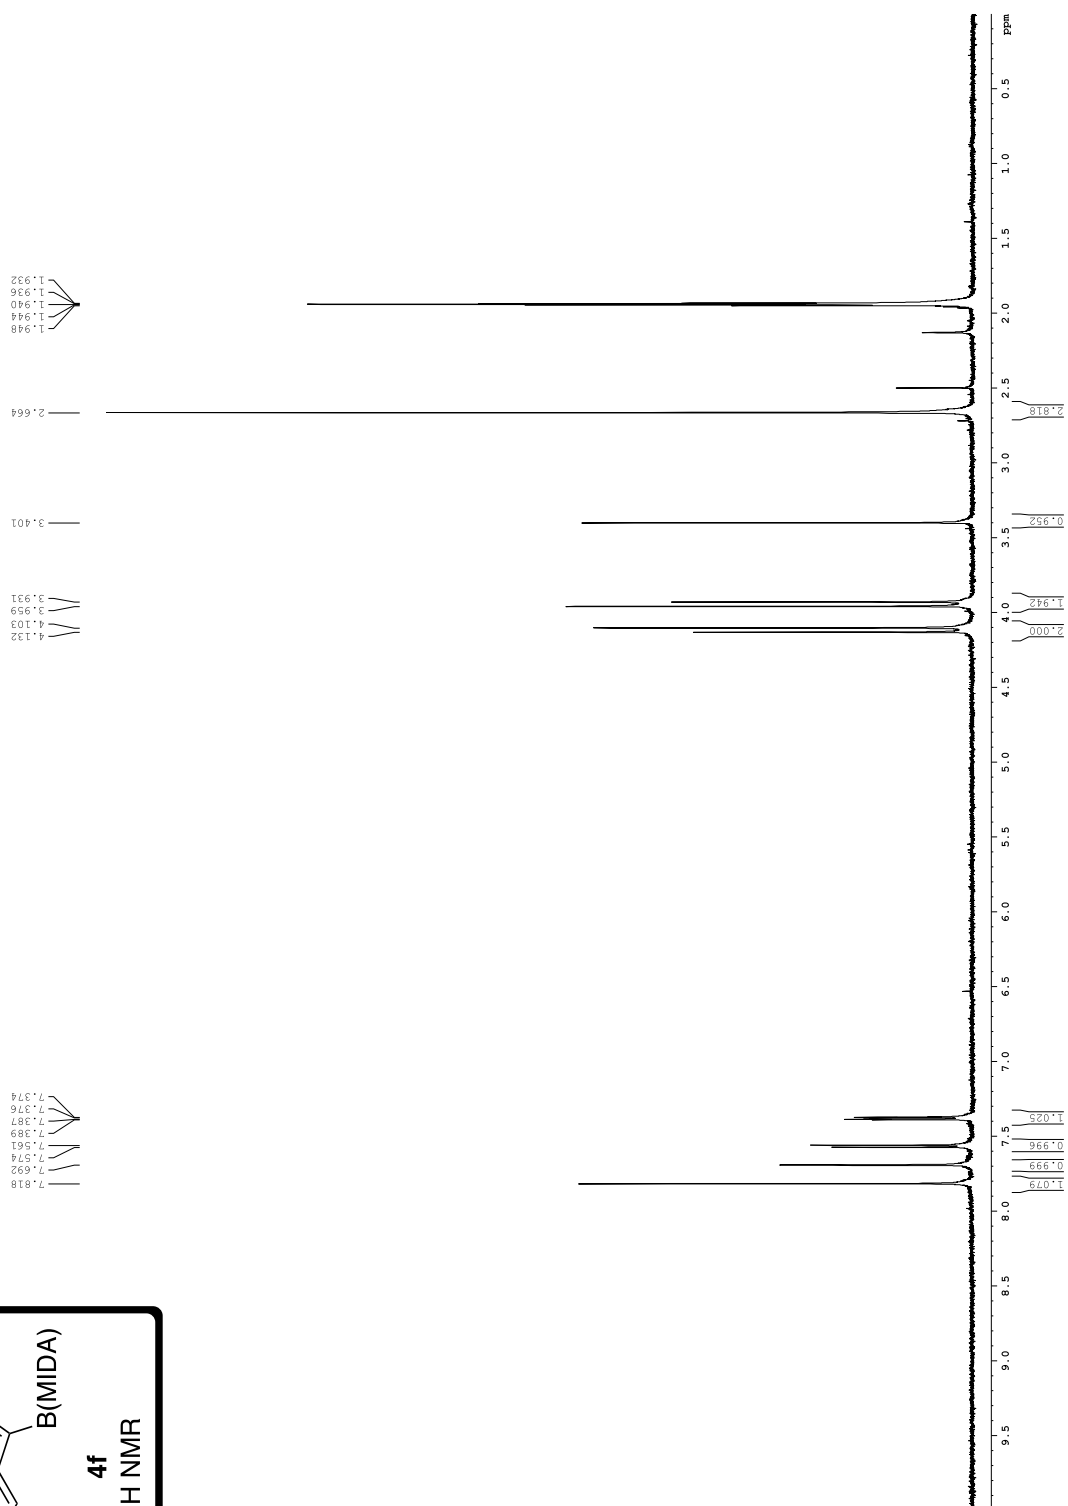

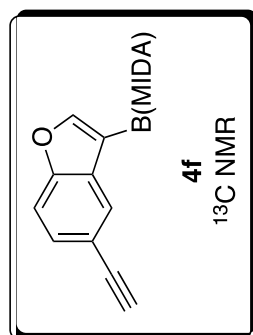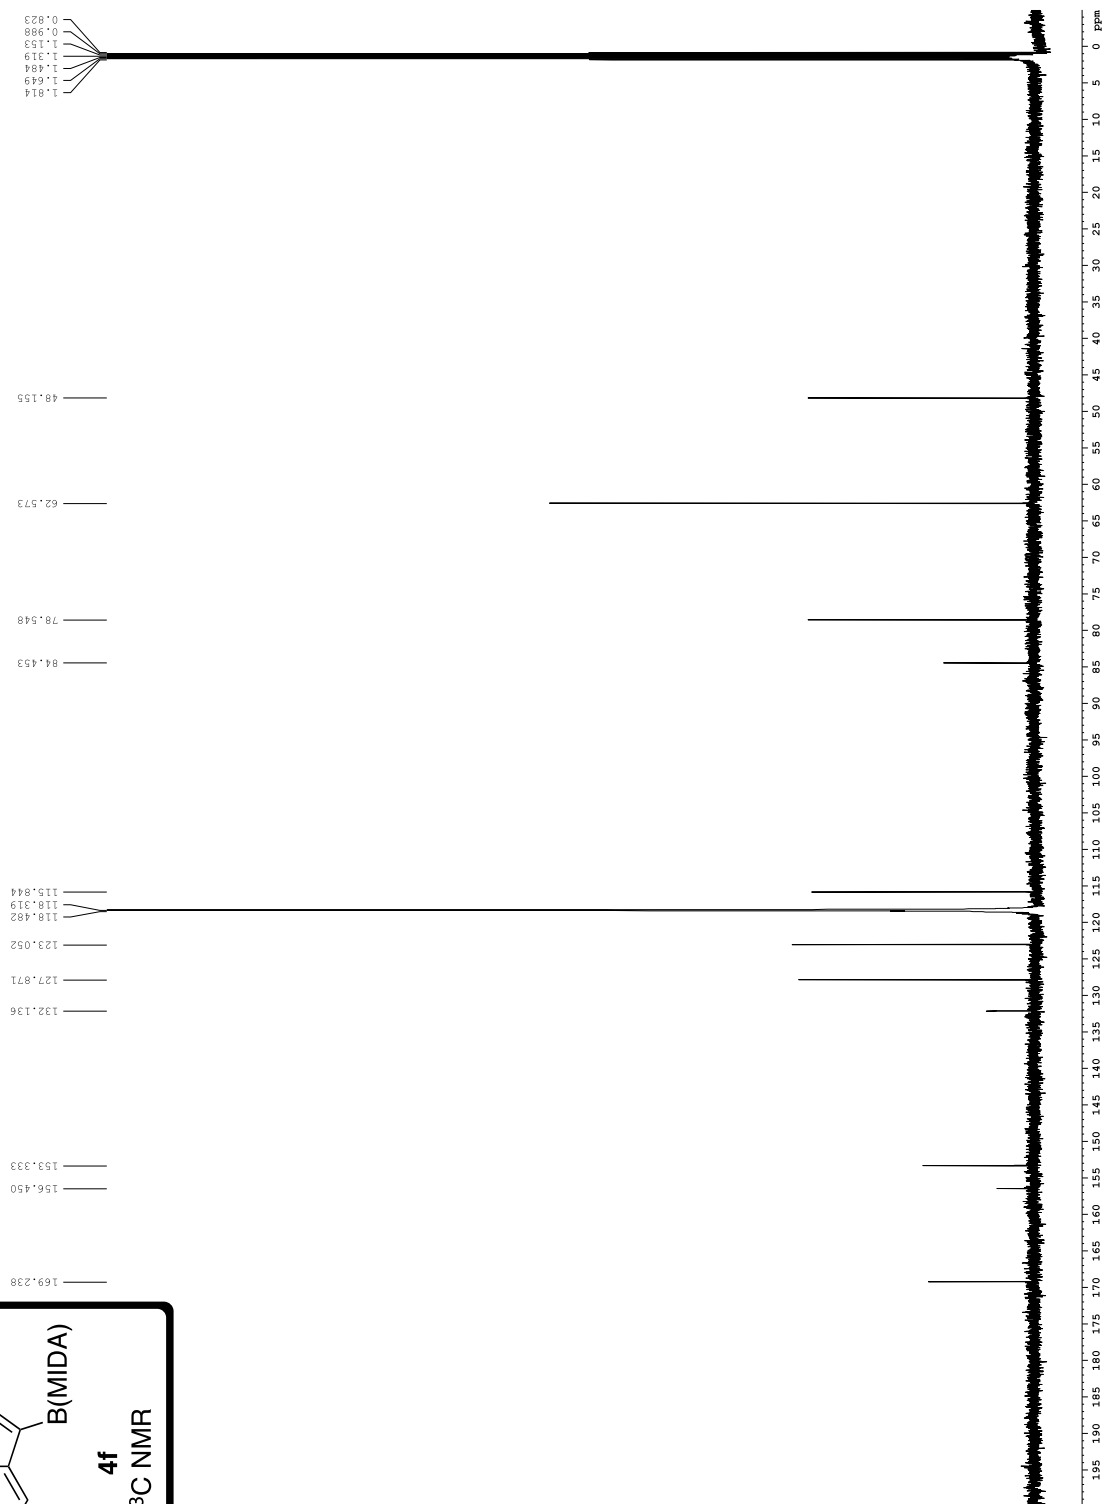

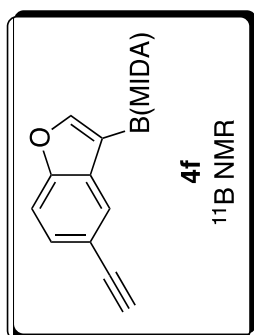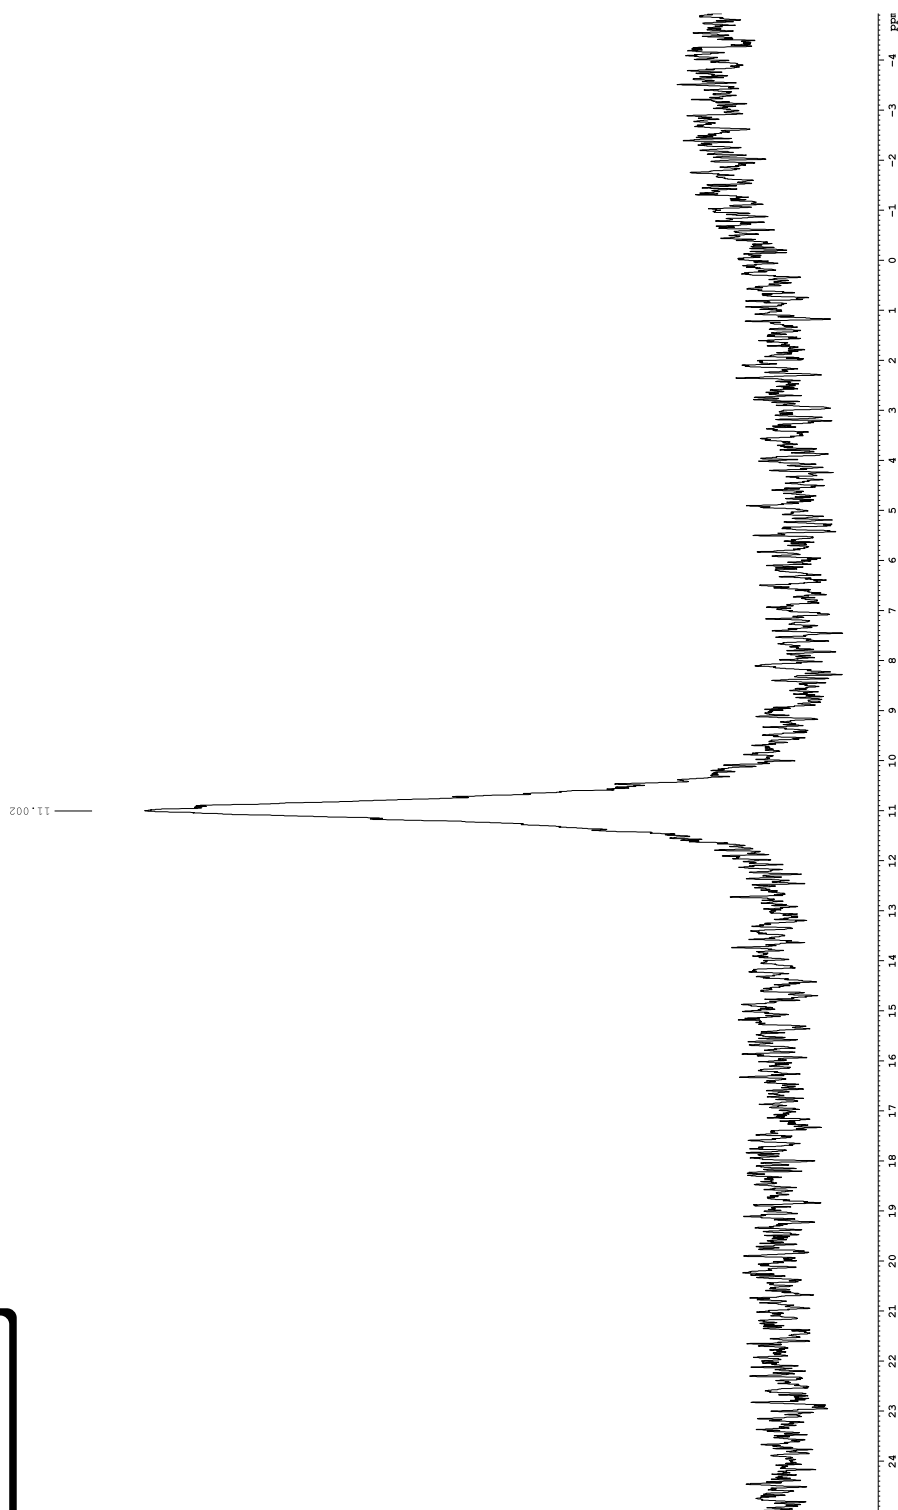

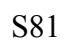

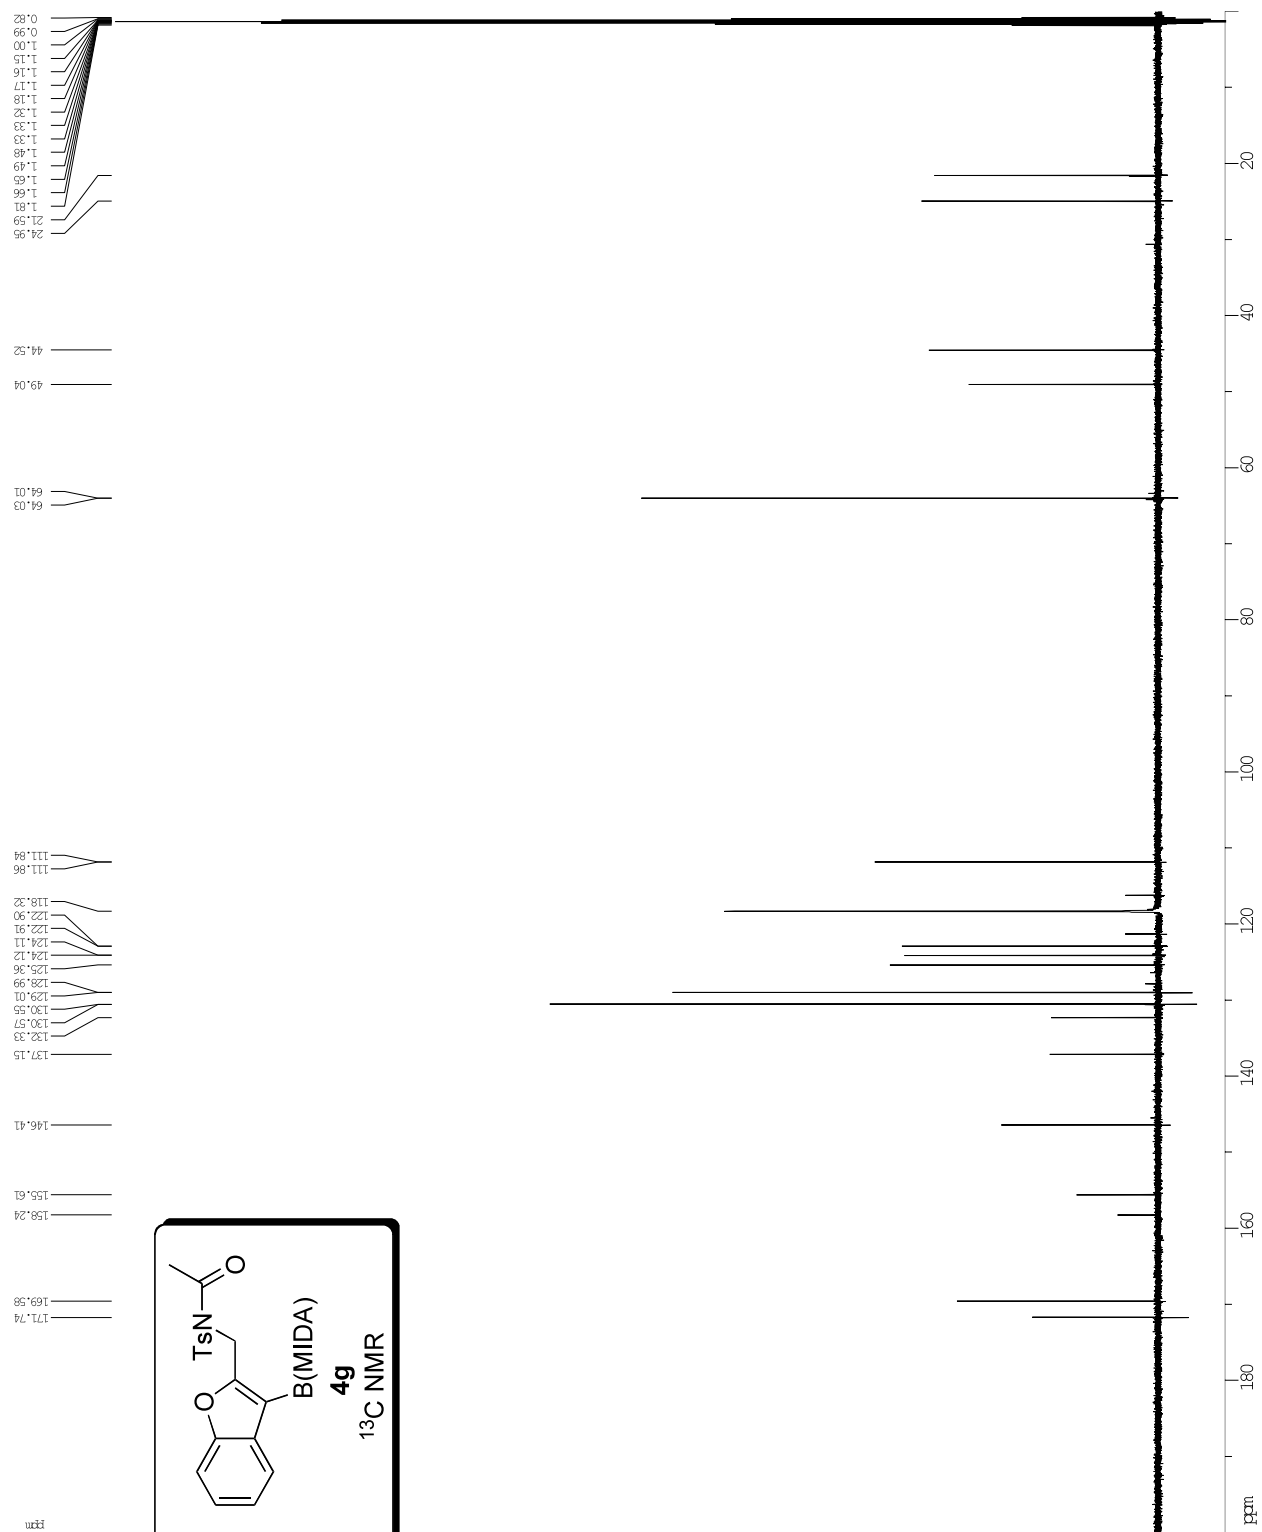

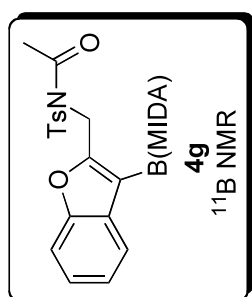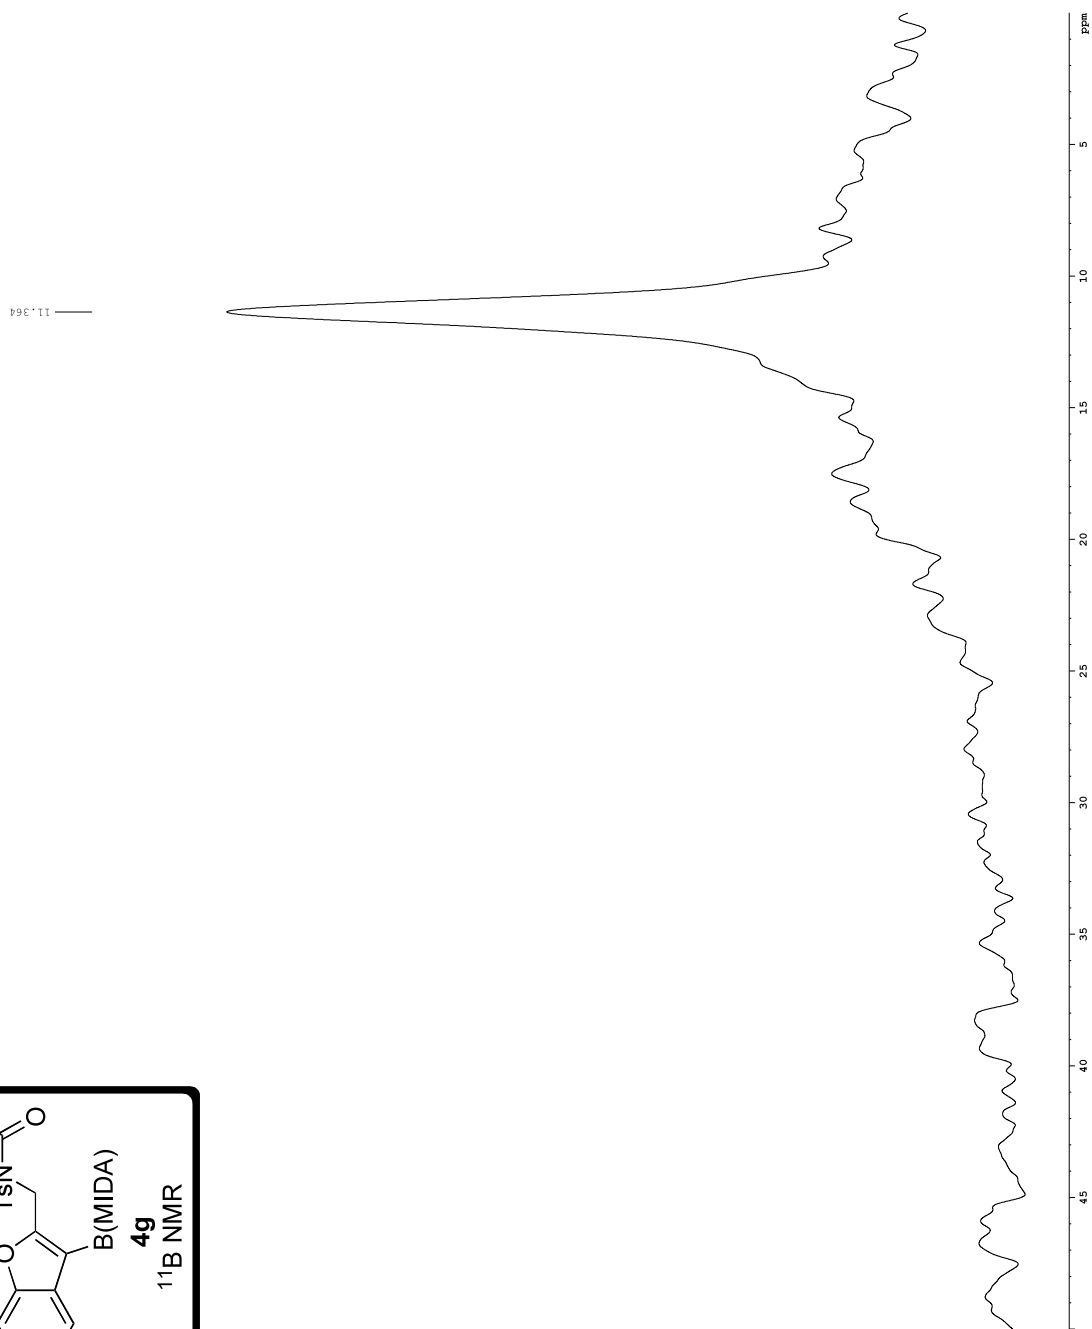

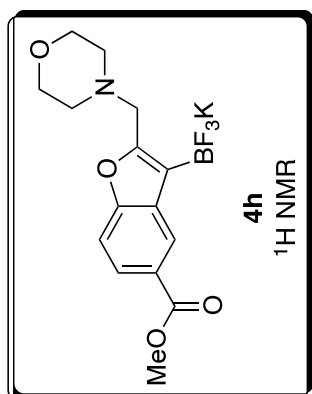

8.303  
 7.760  
 7.757  
 7.746  
 7.743  
 7.446  
 7.431

3.848  
 3.672  
 3.548  
 3.541  
 3.534

2.503  
 2.500  
 2.497  
 2.441  
 2.083

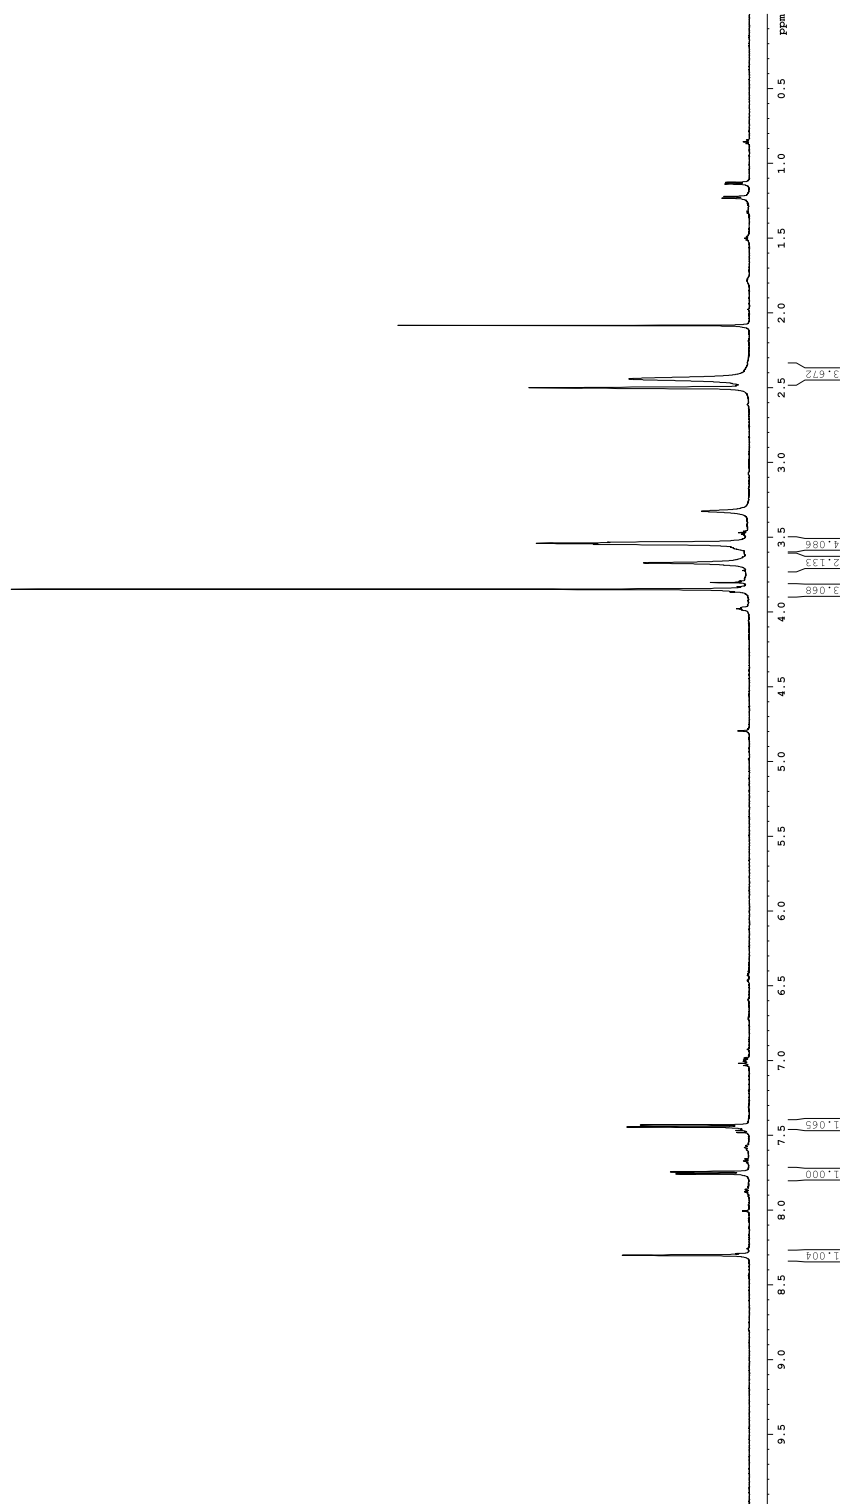



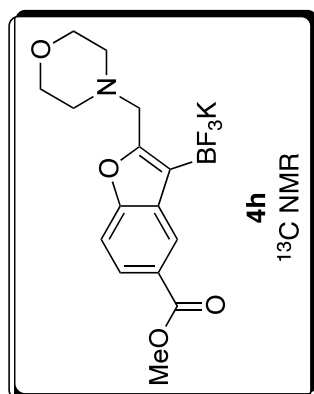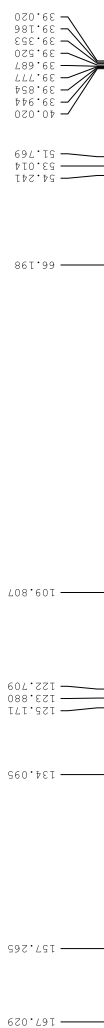

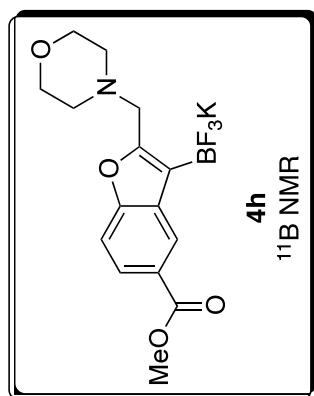

2.844

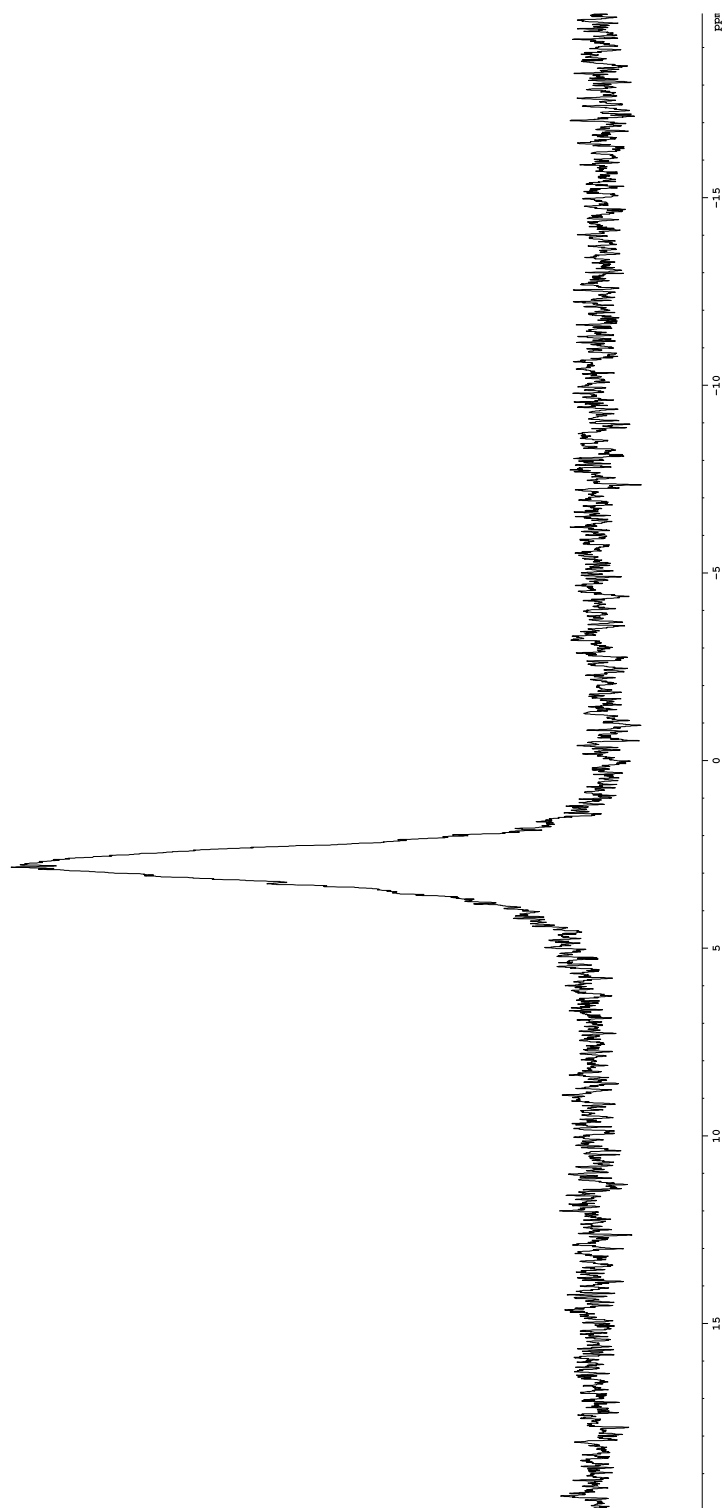

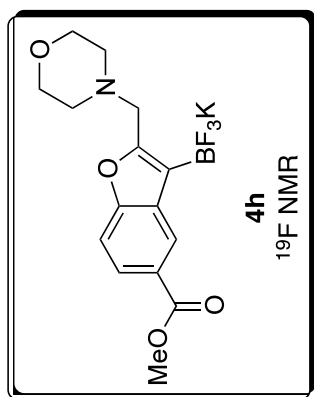

**4h**

$^{19}\text{F}$  NMR

— -133.117

— -73.409

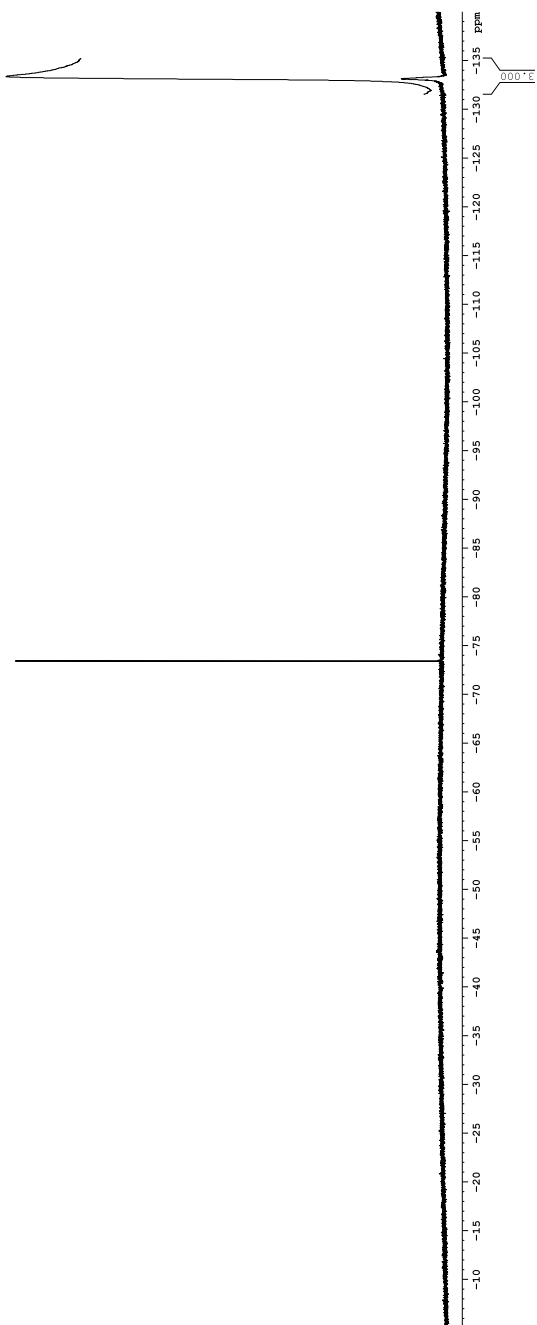

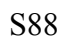

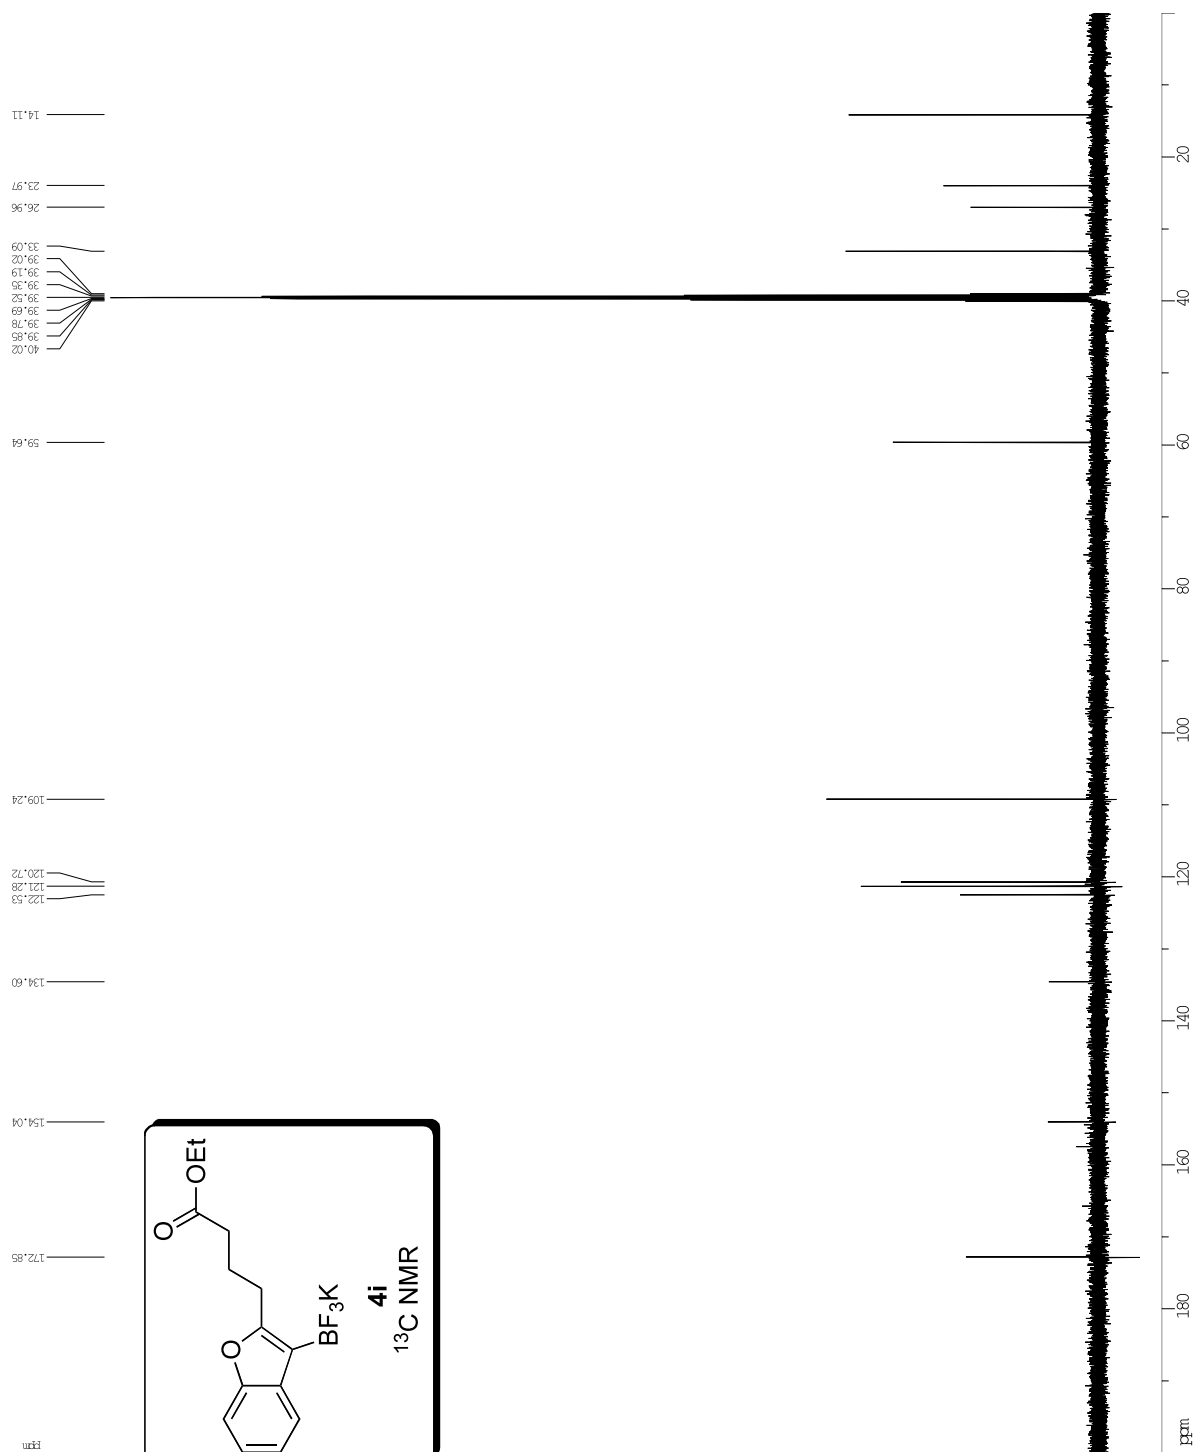

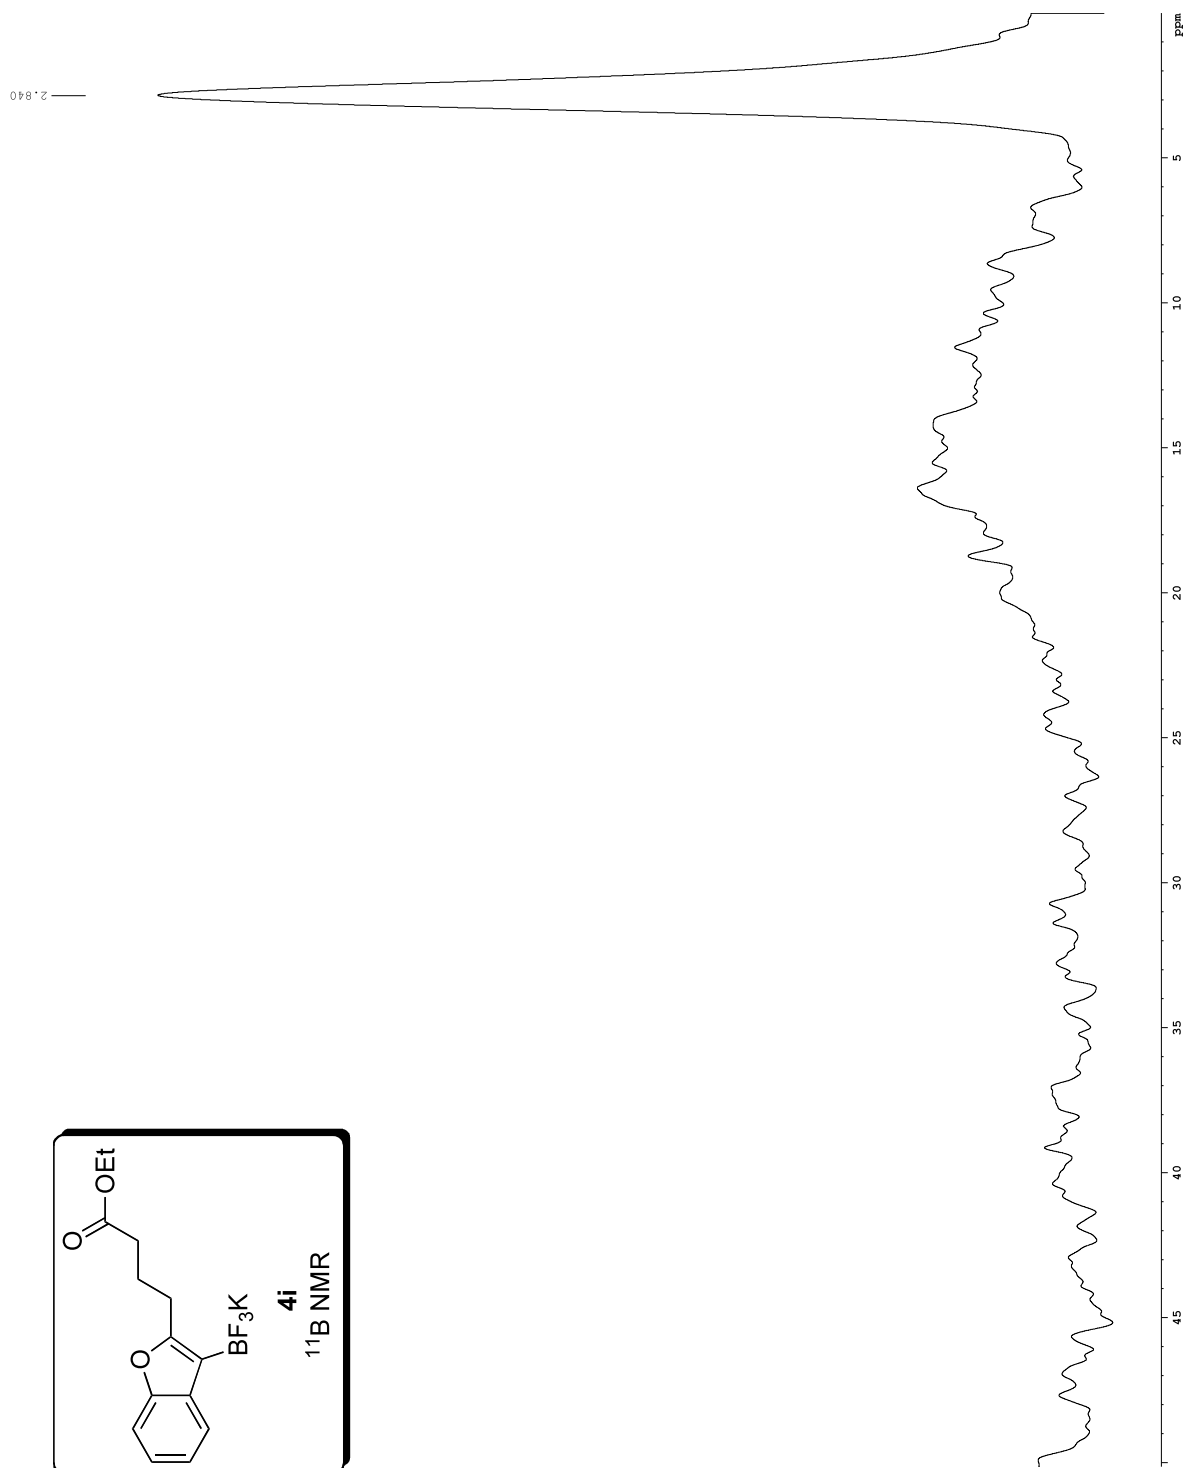

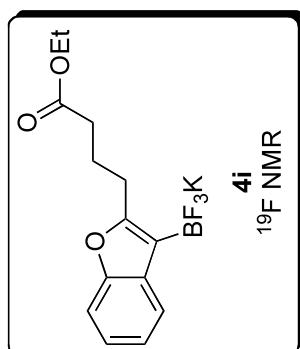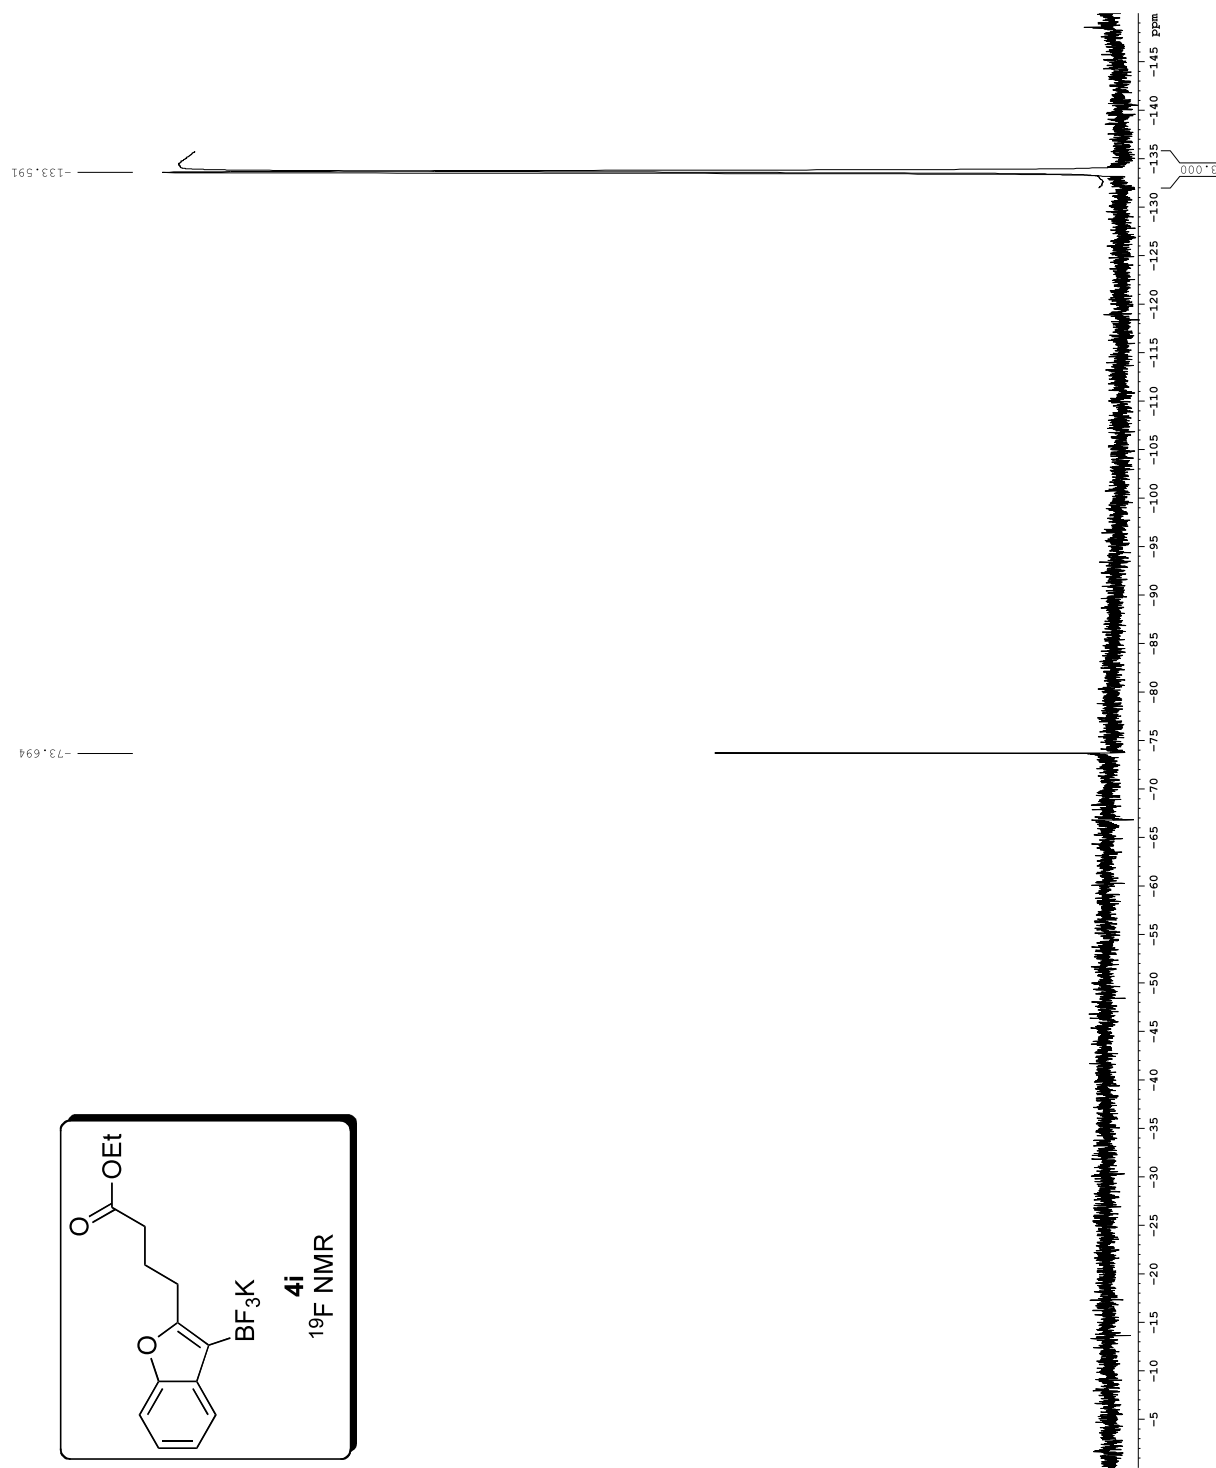

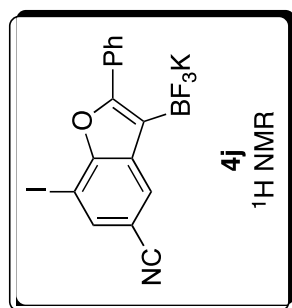

8.071  
8.069  
7.875  
7.873

6.593  
6.589  
6.586  
6.584  
6.580

2.548  
2.545  
2.534  
2.506  
2.503  
2.500  
2.497  
2.494  
2.220  
2.216  
2.210  
2.084  
1.676  
1.671  
1.671  
1.667  
1.661  
1.657  
1.610  
1.606  
1.600  
1.597  
1.591

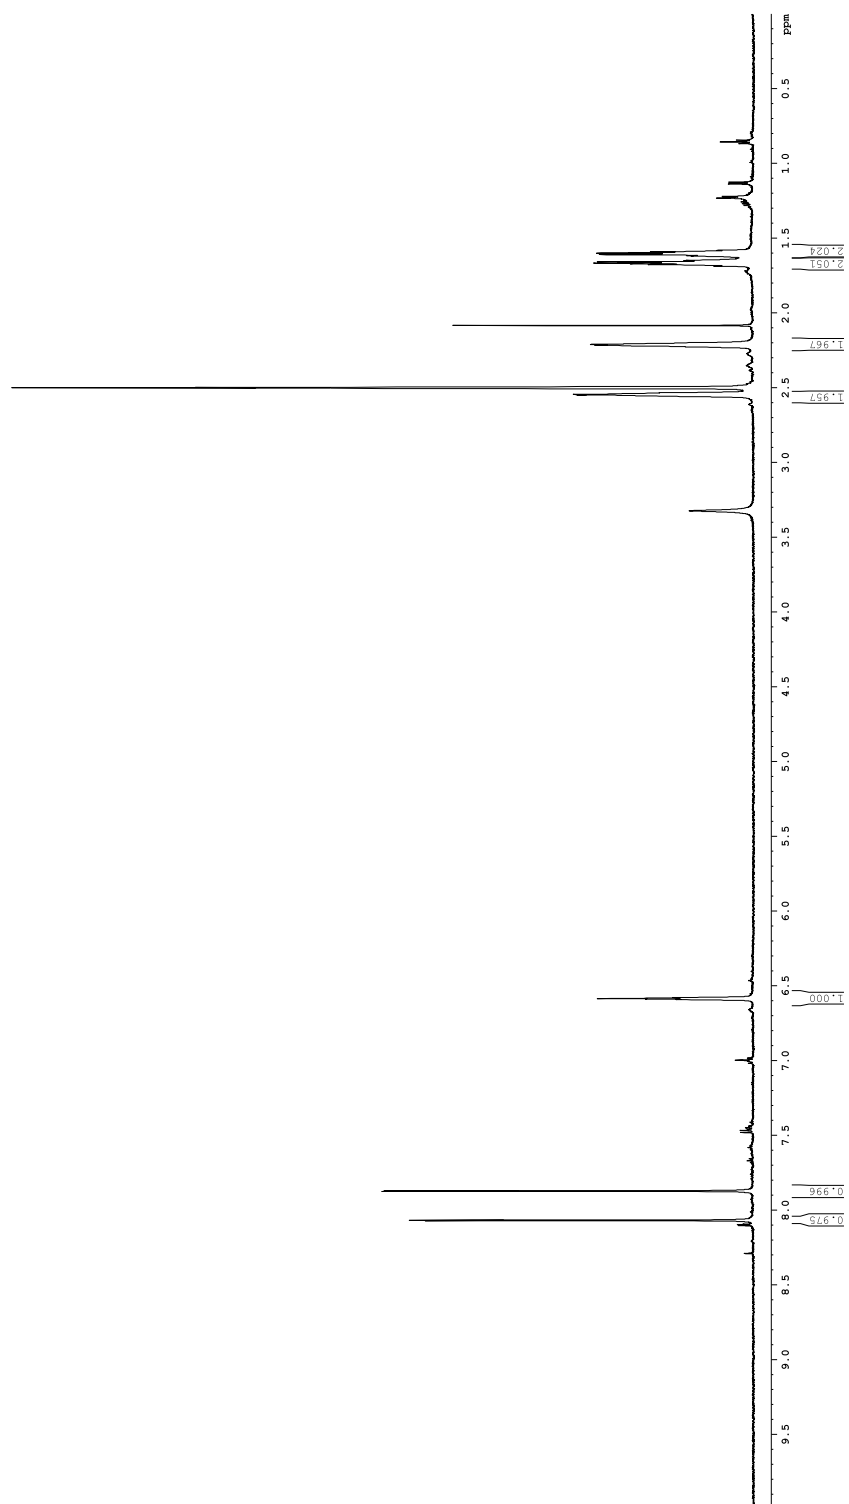



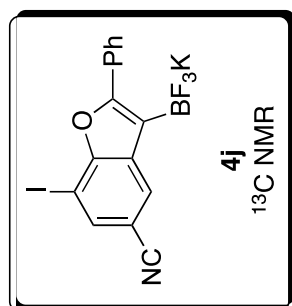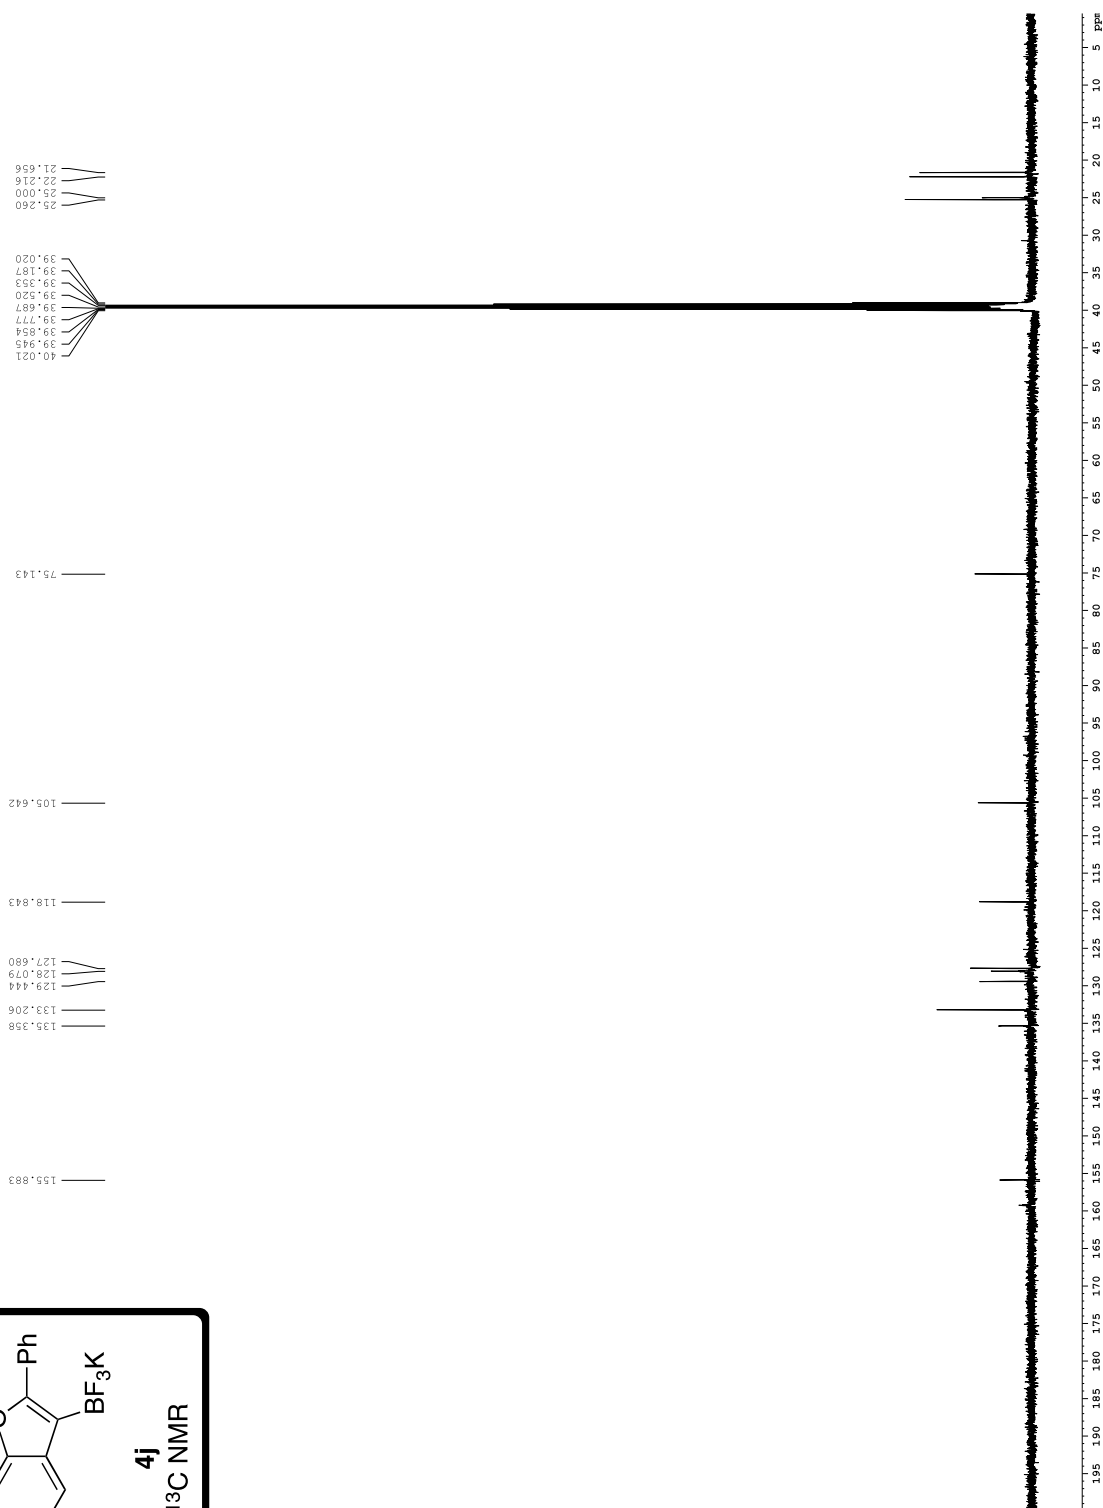

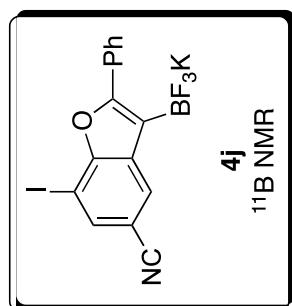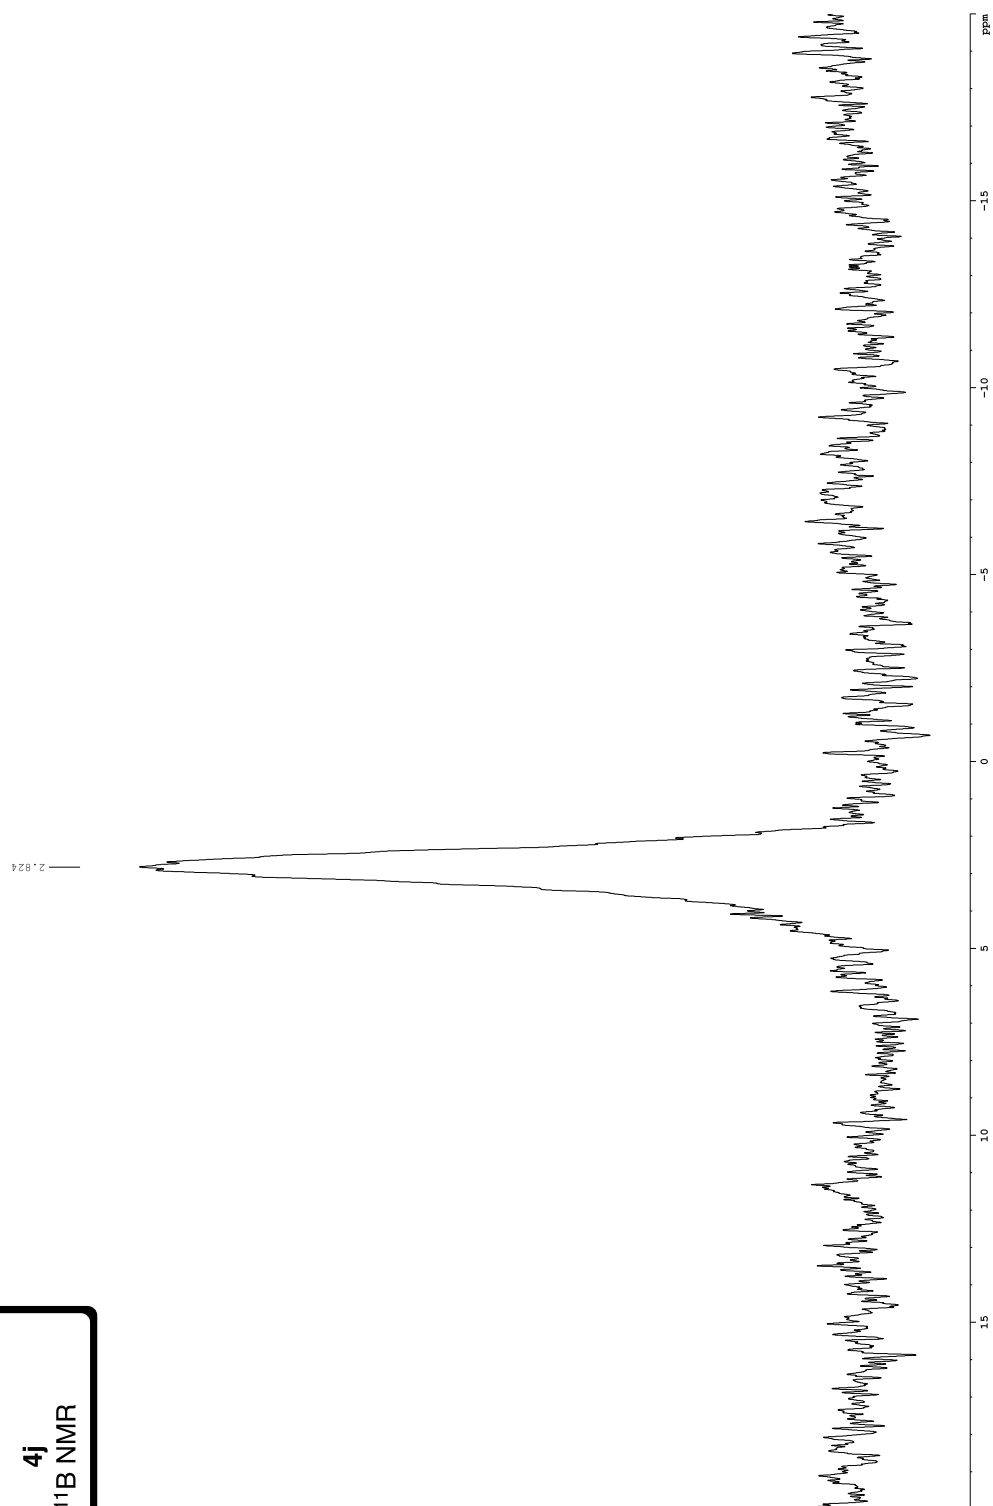

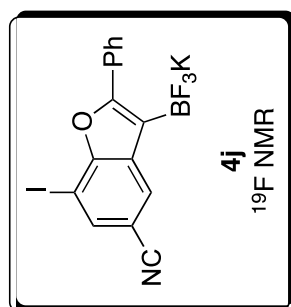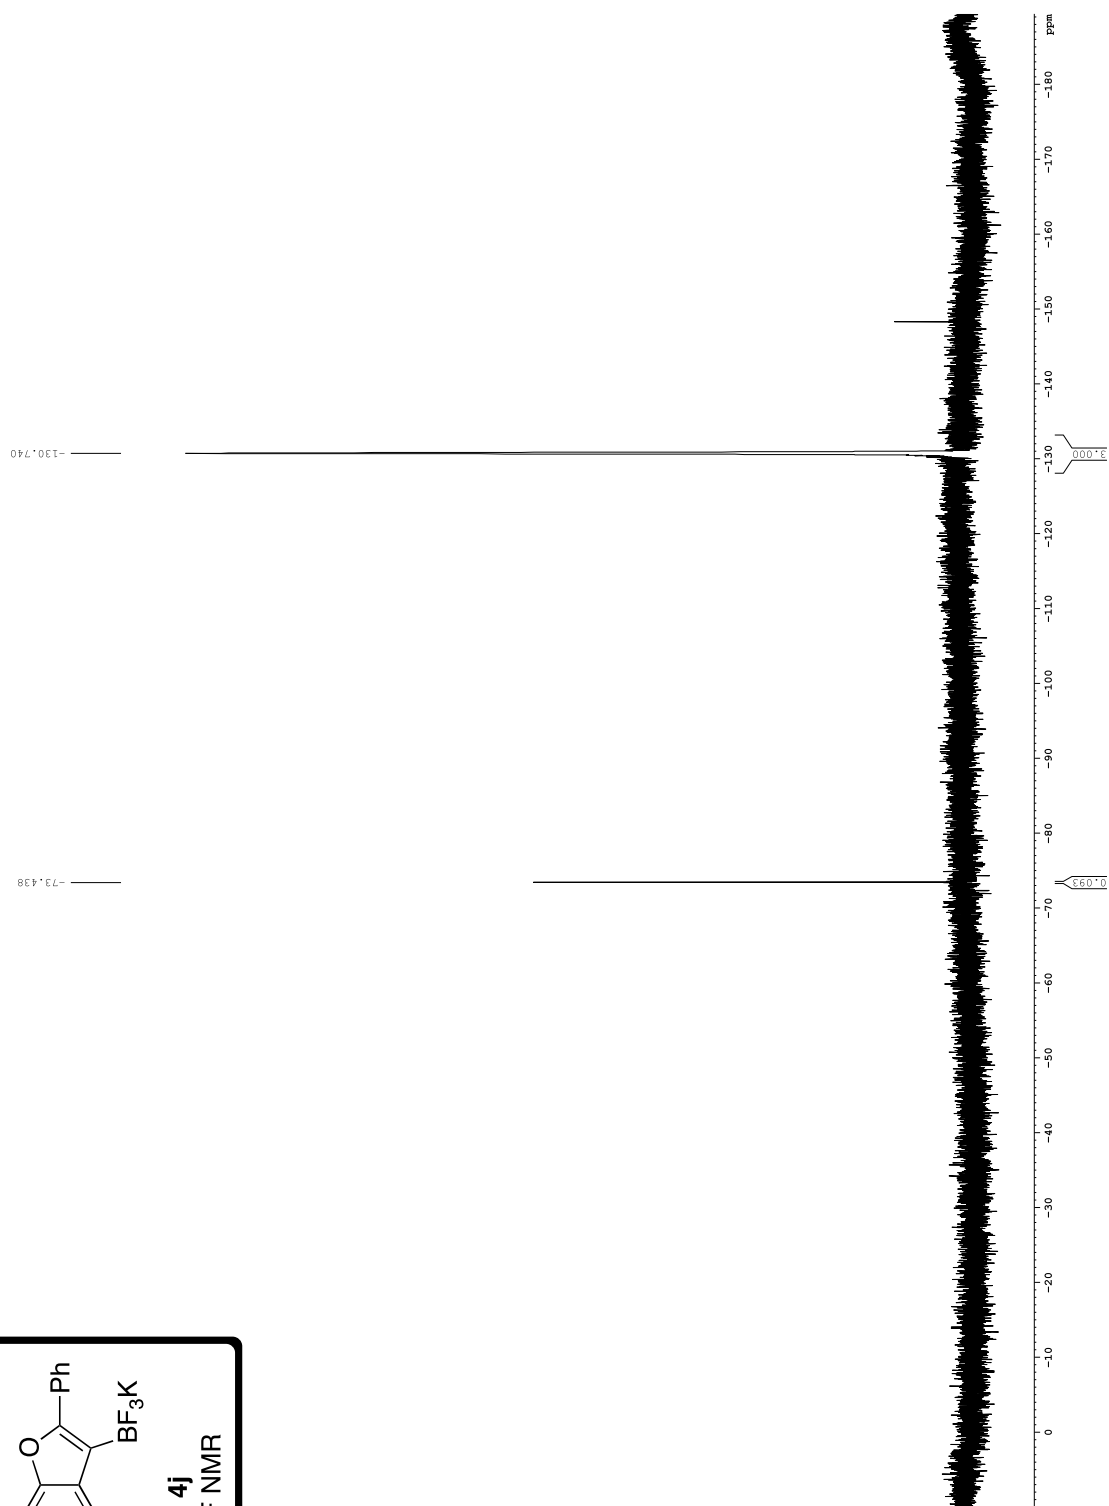

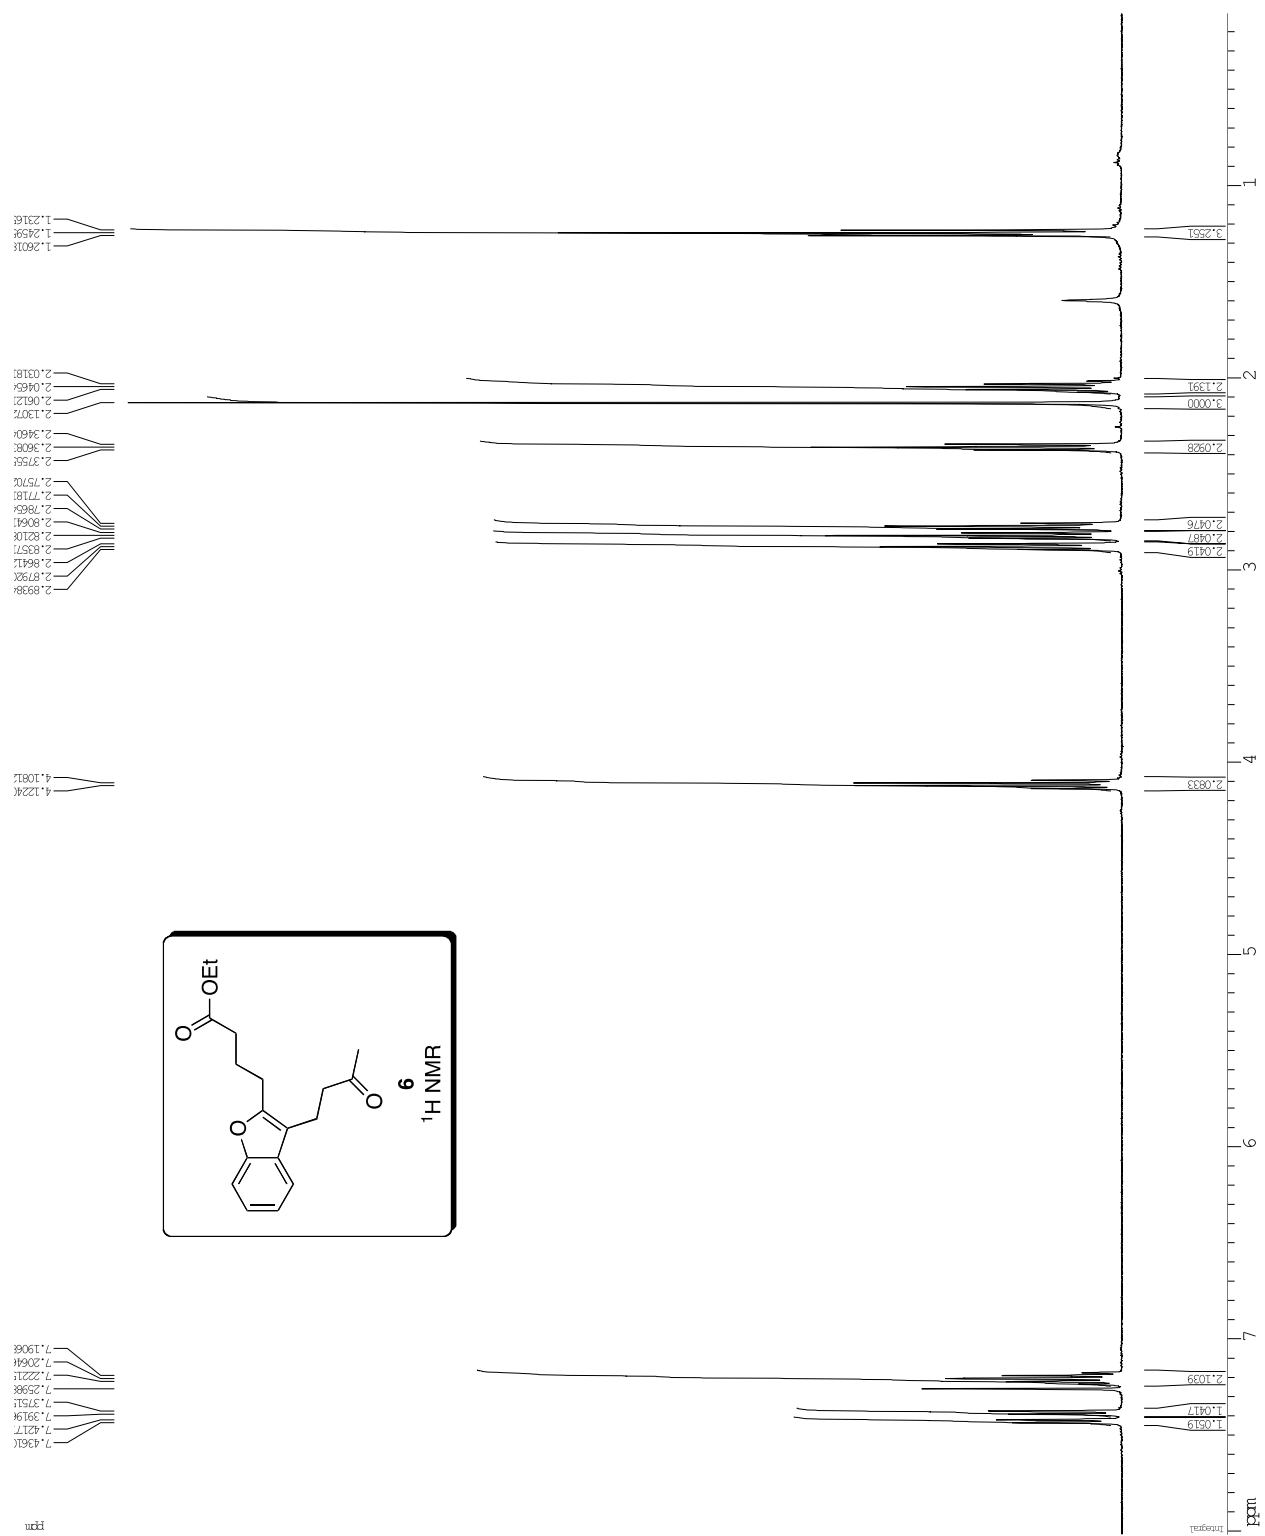

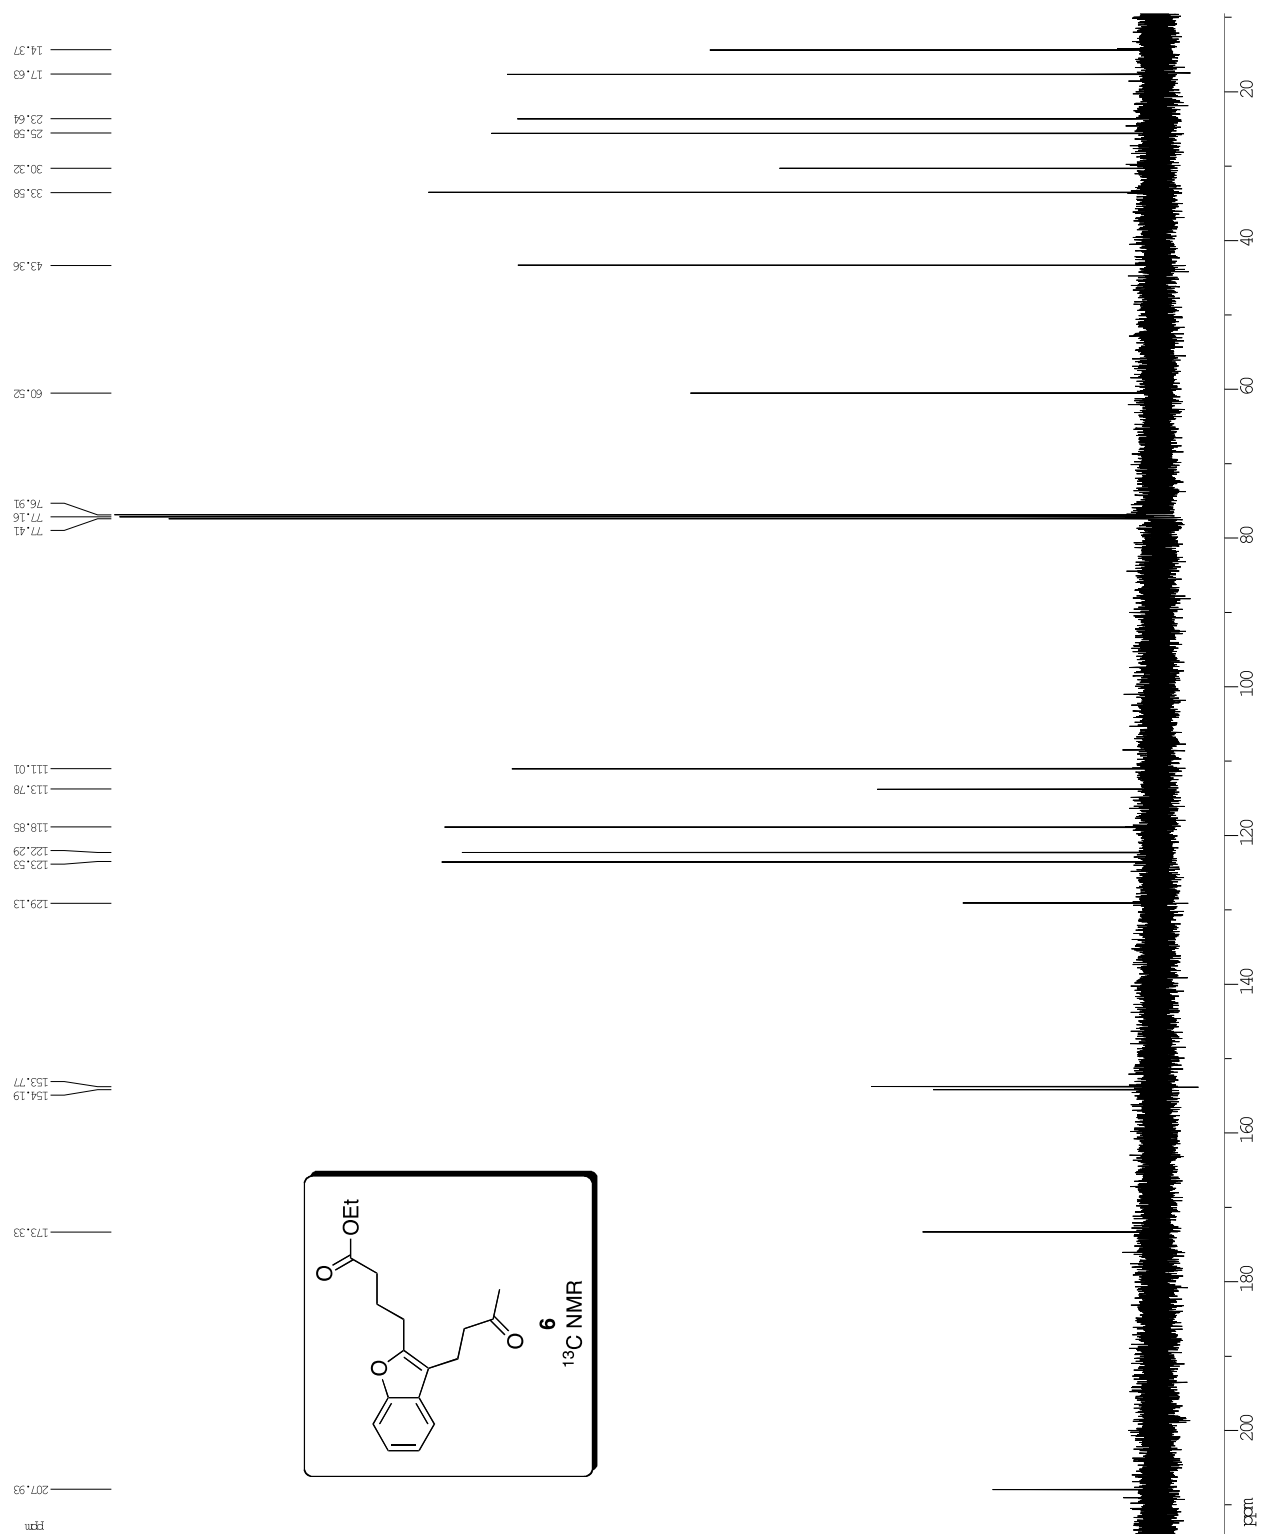

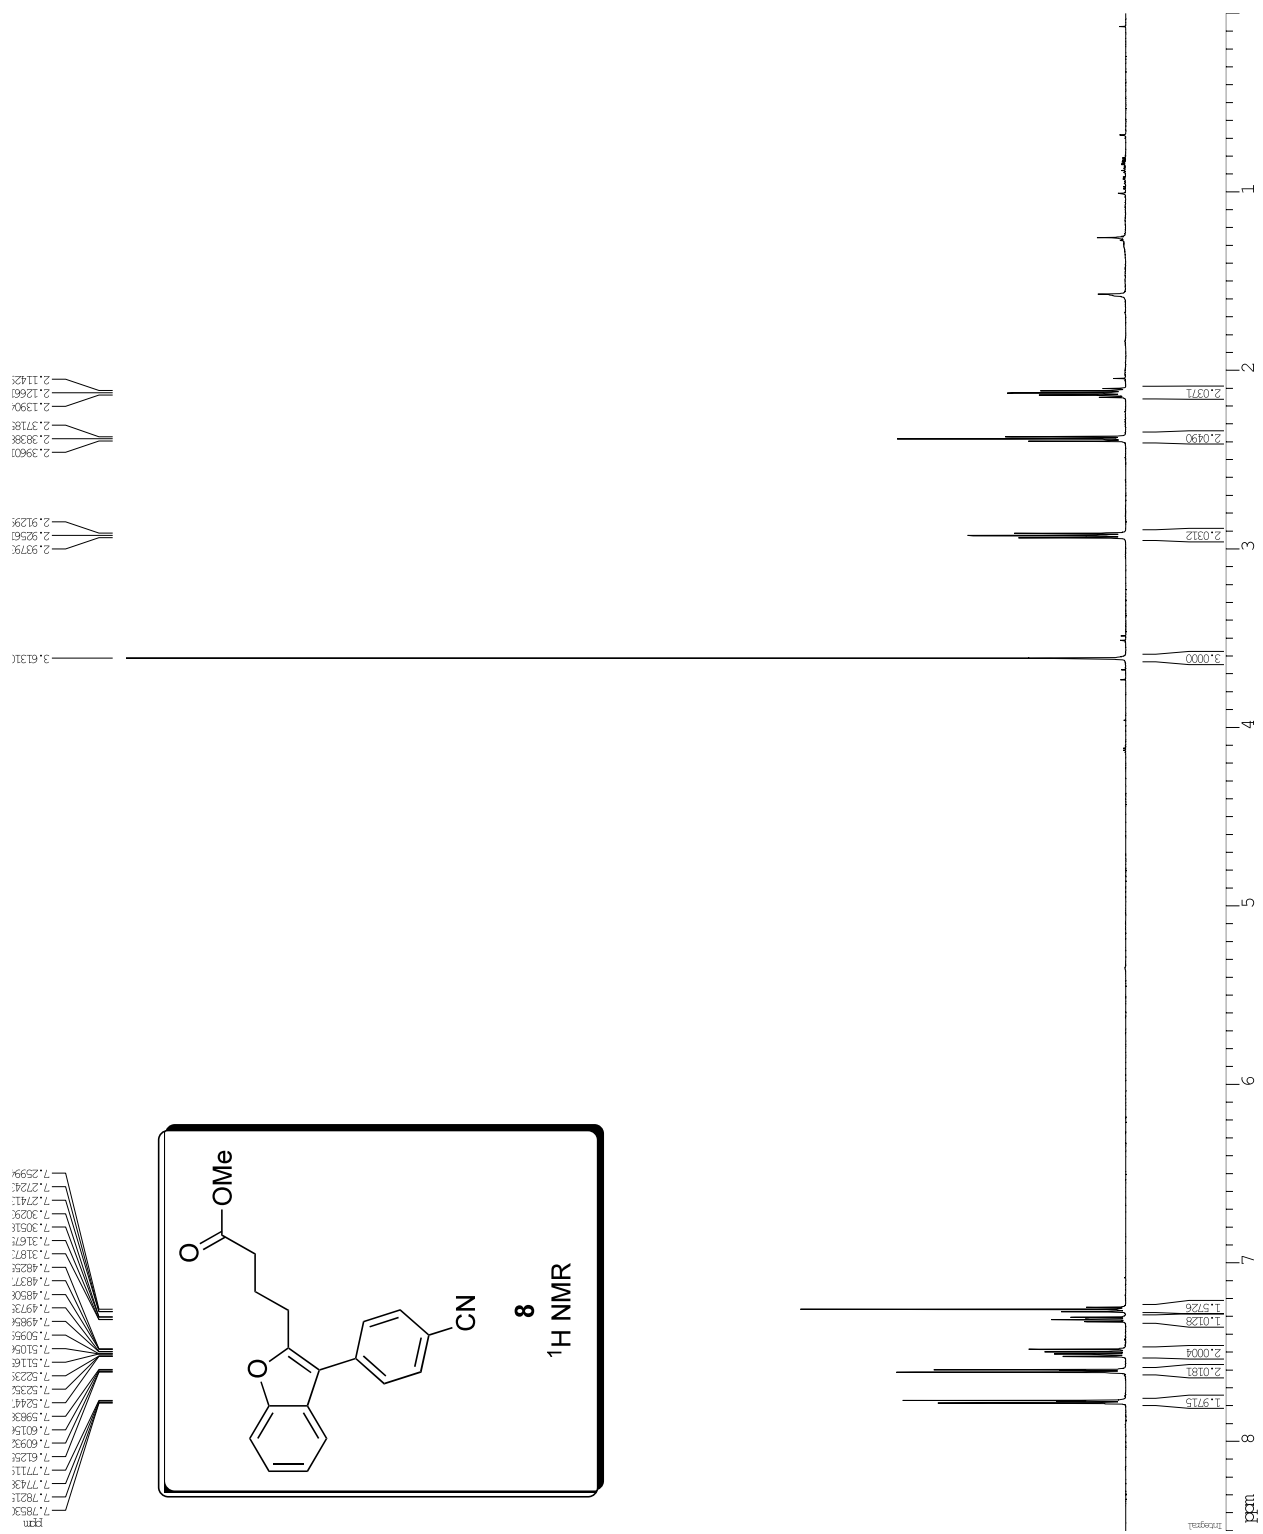

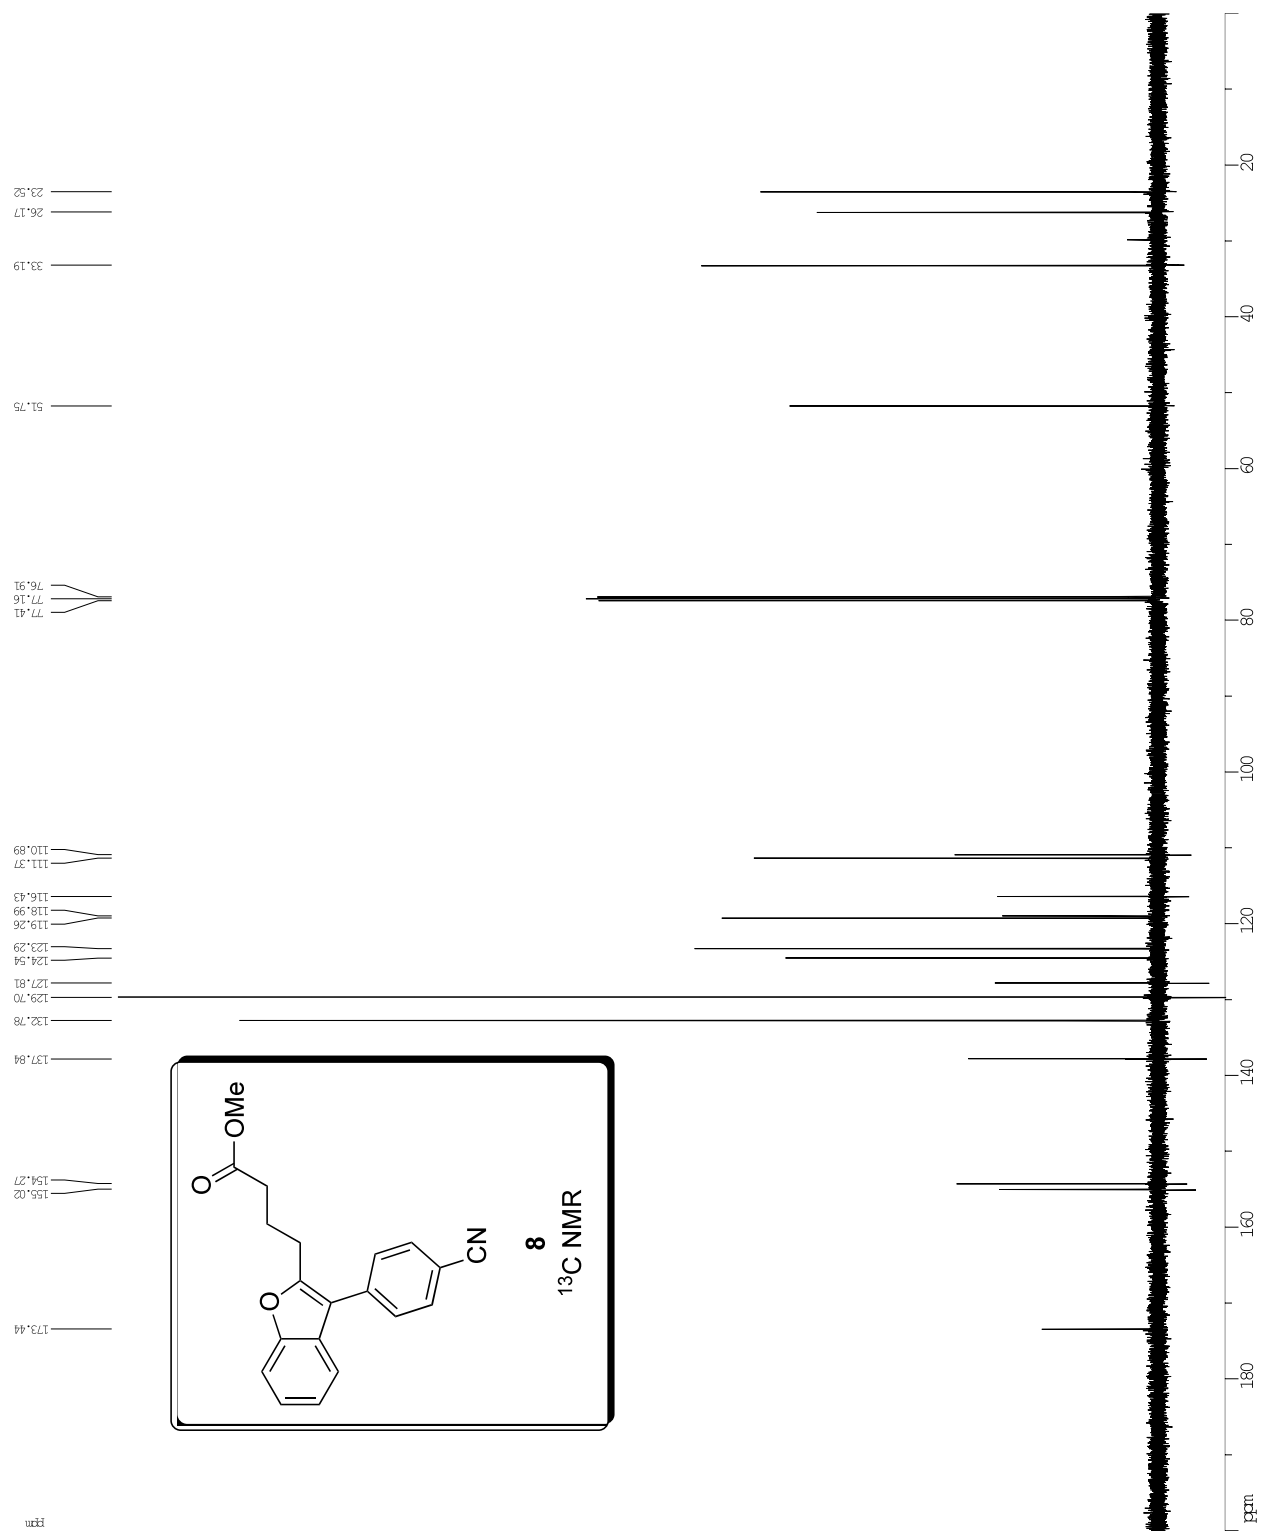

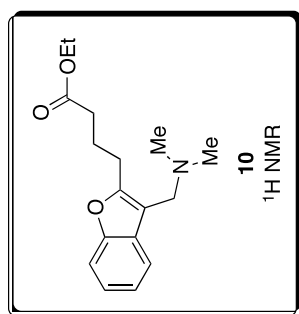

7.630  
 7.627  
 7.625  
 7.616  
 7.612  
 7.402  
 7.399  
 7.389  
 7.385  
 7.270  
 7.242  
 7.239  
 7.228  
 7.224  
 7.216  
 7.213  
 7.212  
 7.209  
 7.201  
 7.198  
 7.186

4.153  
 4.138  
 4.124  
 4.110

3.467

2.877  
 2.863  
 2.848

2.394  
 2.379  
 2.364  
 2.260  
 2.113  
 2.098  
 2.083  
 2.068  
 2.054

1.274  
 1.260  
 1.246

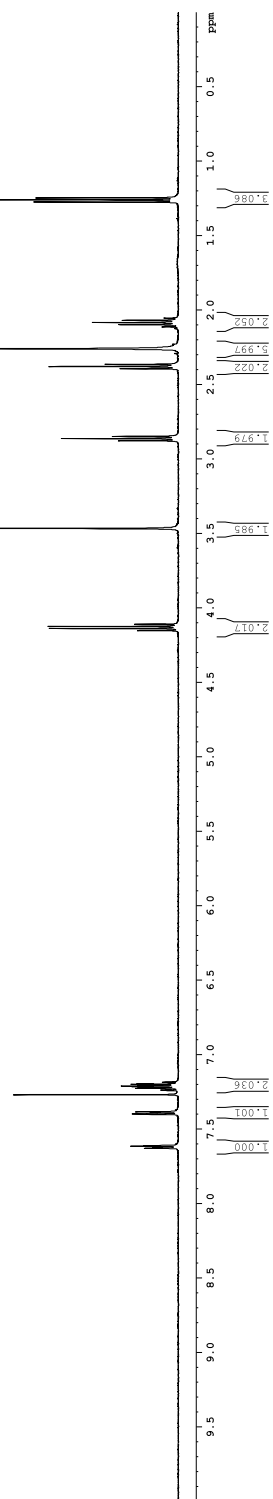



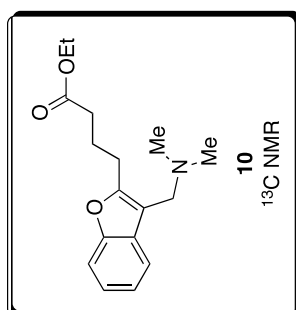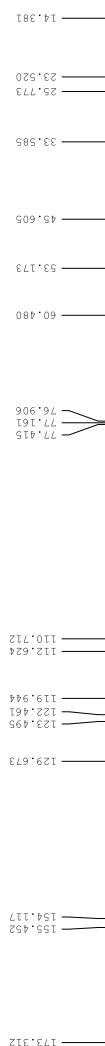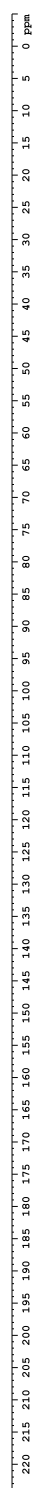

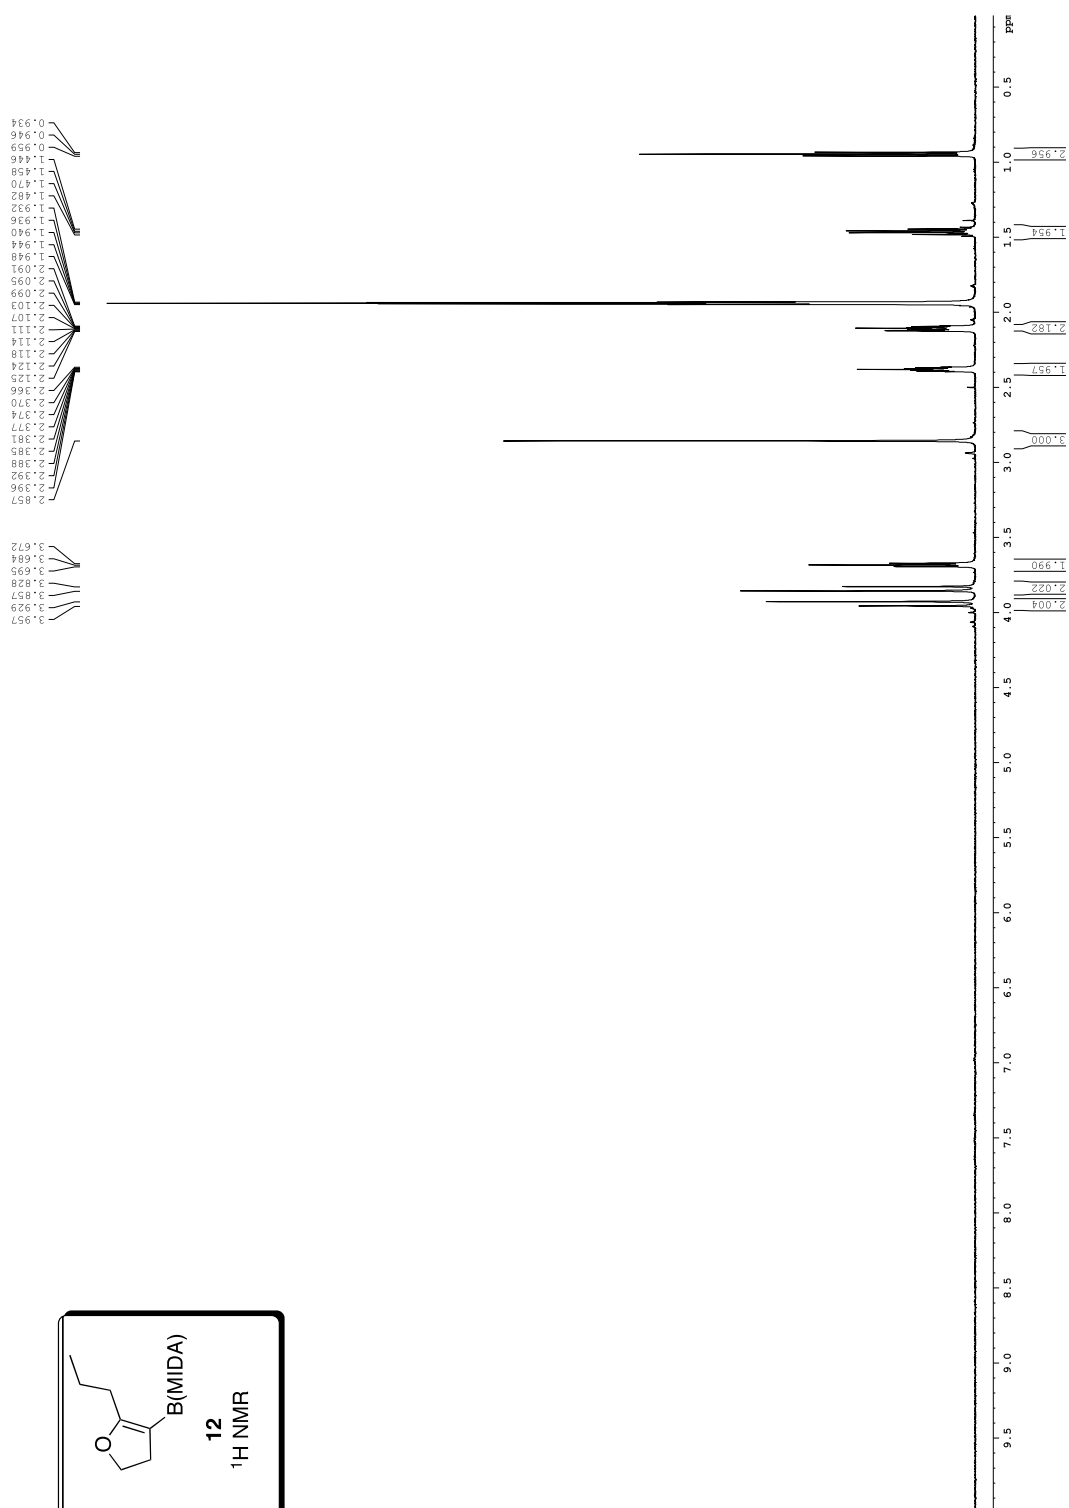

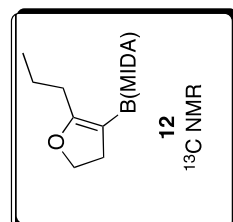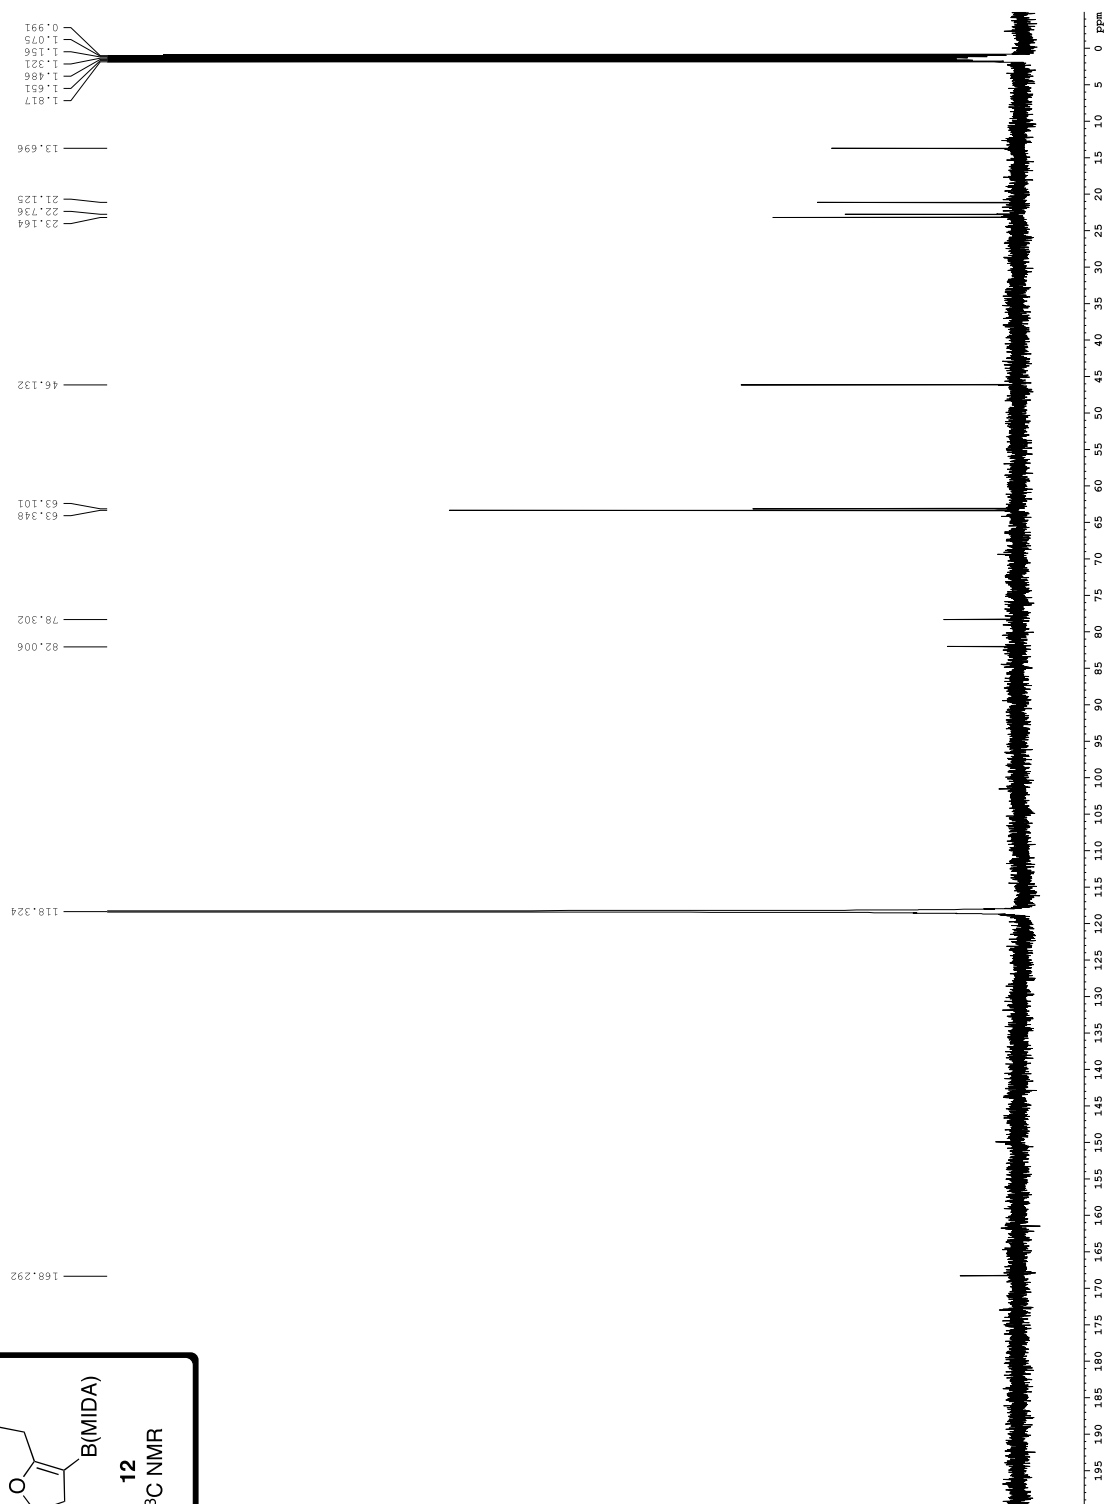

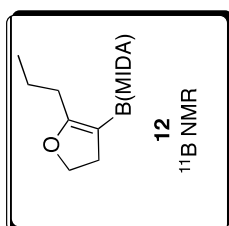

8.788

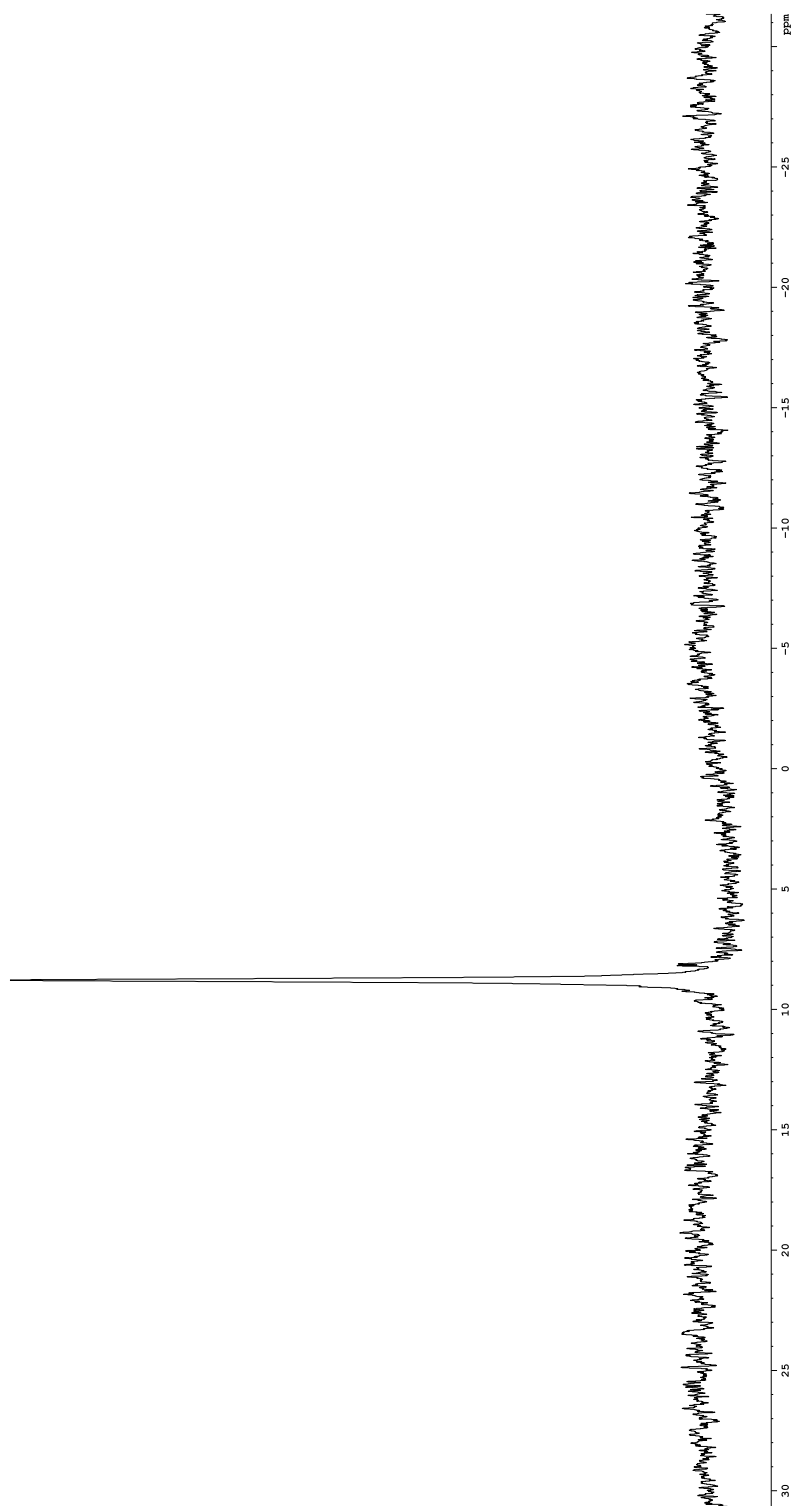

Supplement: Supplementary file 1 [file 3601923]
